# Supplementary material for: How hibernation in frogs drives brain and reproductive evolution in opposite directions
Source: eLife. 2023 Dec 12;12:RP88236. doi: 10.7554/eLife.88236 (PMC10715729; doi:10.7554/eLife.88236)
Supplement: Source data 1. [file elife-88236-data1.xlsx]

## Sheet: Sheet1
Data S1. Data related to environmental conditions, brumation, and breeding.
Species	Latitude	Longitude	Elevation (m)	Temp. begin brumation (°C)	Temp. end brumation (°C)	Mean precipitation (mm)	CV precipitation	P2T	Mean temp. (°C)	CV temp.	Habitat	Brumation period (d)	Breeding season (d)	Breeding aggregation	Density (ind./m2)
Amolops chunganensis	32°41'	106°59'	1531.9	5	8	118.67	0.69	1	10.38	0.73	semiaquatic	109	62.5	no
Amolops granulosus	32°41'	106°59'	1531.9	2	6	118.67	0.69	1	10.38	0.73	semiaquatic	107.4
Amolops kangtingensis	30°4'	101°29'	3400	3	5	96.83	0.81	2	6.58	0.79	aquatic	181.4
Amolops lifanensis	32°31'	104°5'	1354.8	3	8	51.92	0.58	0	3.83	1.72	aquatic	139.6
Amolops loloensis	29°1'	102°22'	2002.1	6.8	12.5	127	0.75	2	12.79	0.39	aquatic	136.6	30	yes
Amolops mantzorum	30°32'	106°56'	1662.4	4	6	75.92	0.63	3	16.96	0.44	aquatic	86.6	69	no	0.016
Amolops ricketti	26°22'	108°9'	1259.2	7	13	101.08	0.45	0	14.92	0.45	semiaquatic	120.8
Amolops sinensis	28°37'	106°25'	1121.5	7	13	98.75	0.48	0	13.71	0.49	aquatic	103.6
Amolops torrentis	18°43'	109°52'	913.2	7	13	116	0.9	5	19.29	0.14	aquatic	1
Amolops yunkaiensis	22°16'	111°11'	935.9	8	13	115.58	0.76	1	18.08	0.26	aquatic	77
Aquixalus palpebralis	22°54'	103°41'	2056.8	5.5	8.3	71.5	0.85	2	12.58	0.32	arboreal	61
Babina daunchina	29°35'	103°17'	1250	4	9	123	0.69	1	13.29	0.53	semiaquatic	73
Bombina maxima	27°43'	100°49'	2685	8	13	71.75	0.99	5	10.17	0.55	semiaquatic	140.6	29	yes
Brachytarsophrys chuannanensis	27°17'	103°20'	1600	9	13	59.17	0.79	4	10.58	0.53	semiaquatic	128
Brachytarsophrys feae	26°22'	108°11'	1523.4	7	13	101.08	0.45	0	14.92	0.45	semiaquatic	156.2
Bufo andrewsi	30°32'	106°56'	1662.4	-1	9	75.92	0.63	3	16.96	0.44	terrestrial	89.2	70.5	no	0.024
Bufo gargarizans	30°48'	106°6'	300	8.6	11.3	43.75	0.64	6	19.29	0.39	terrestrial	89.4	30	yes	0.54
Bufo melanostictus	25°58'	108°23'	276	7	12	102.67	0.47	0	18.92	0.35	terrestrial	70.6	64	no
Bufo minshanicus	32°41'	102°58'	3431.2	3.3	6	90.42	0.55	0	2.29	2.71	terrestrial	212.2	28.5	yes
Bufo raddei	40°2'	113°8'	1200	8	11	30.08	0.85	4	7.29	1.56	terrestrial	186
Bufo tibetanus	29°59'	101°53'	3291	5	7	96.83	0.81	2	7.83	0.67	terrestrial	205.2	28.5	yes
Calluella yunnanensis	24°32'	101°1'	2432.7	6	11.5	90.75	0.89	6	14.04	0.29	terrestrial	97.4
Chirixalus doriae	21°55'	101°16'	572.3	9	11	61	0.92	7	23.42	0.14	arboreal	0.6
Chirixalus vittatus	18°43'	109°52'	913.2	9	11	116	0.9	5	19.29	0.14	arboreal	3.6
Feirana quadranus	32°38'	106°30'	1276.2	5	8	99	0.64	2	11.63	0.64	aquatic	119.8	56	no
Fejervarya multistriata	28°37'	104°56'	320	15	18	48.5	0.4	5	19.33	0.37	semiaquatic	144.4	63.5	no	0.023
Hyla annectans chuanxiensis	30°32'	106°56'	1662.4	6	9	75.92	0.63	3	16.96	0.44	arboreal	120.8
Hyla annectans jingdongensis	22°57'	103°41'	1536.9	3.5	5	71.5	0.85	6	17.88	0.23	arboreal	4.4	57.5	no	0.085
Hyla annectans wulingensis	27°52'	108°27'	730	3	8	92.08	0.38	0	16.54	0.44	arboreal	64.4	58	no
Hyla chinensis	22°16'	111°11'	935.9	7	12	115.58	0.76	1	18.08	0.26	arboreal	59.2
Hyla sanchiangensis	27°52'	108°27'	730	3	8	92.08	0.38	0	16.54	0.44	arboreal	64.4
Hyla tsinlingensis	30°36'	109°26'	1300.8	5	10	145.75	0.59	0	12.04	0.59	arboreal	115.6	57.5	no
Hylarana guentheri	30°22'	105°22'	320	15	18	37.58	0.7	6	18.83	0.4	semiaquatic	175.4	46.5	no
Hylarana nigrotympanica	20°0'	100°44'	570.2	7.5	10.5	109	0.93	6	24.83	0.11	aquatic	0.6
Kaloula pulchra	20°0'	100°44'	570.2	5.5	11	109	0.93	6	24.83	0.11	terrestrial	0.6
Kaloula rugifera	31°37'	104°25'	572	8	12	171	0.7	1	17.38	0.42	terrestrial	89.6
Kaloula verrucosa	25°3'	102°35'	2221.8	3	8	58.42	0.8	6	13.29	0.34	terrestrial	26.4	66	no
Leptobrachella bijie	27°54'	104°45'	831	2	5	61.08	0.43	2	15.04	0.46	terrestrial	7.8	48	no
Leptobrachella feii	22°56'	103°41'	1770.2	7.5	9.5	71.5	0.85	7	20.17	0.21	arboreal	59.4
Leptobrachium boringii	28°42'	104°1'	1500	5	10	108.5	0.85	1	12.92	0.53	terrestrial	111.4
Leptolalax oshanensis	22°0'	100°54'	658.7	9	13	79.67	1.03	6	21.29	0.15	terrestrial	0.6
Leptolalax ventripunctatus	20°0'	100°44'	570.2	8	10	109	0.93	6	24.83	0.11	terrestrial	0.6
Limnonectes fujianensis	30°36'	109°26'	1300.8	6	13	145.75	0.59	0	12.04	0.59	aquatic	135
Lithobates catesbeianus	30°22'	105°22'	320	11	14	37.58	0.7	6	18.83	0.4	aquatic	180	36.5	yes
Megophrys daweimontis	22°56'	103°41'	1770.2	7.5	9	71.5	0.85	7	20.17	0.21	terrestrial	55
Megophrys jingdongensis	24°32'	101°1'	2432.7	4	8	90.75	0.89	6	14.04	0.29	semiaquatic	55.8
Megophrys kuatunensis	22°16'	111°11'	935.9	9	13	115.58	0.76	1	18.08	0.26	semiaquatic	86.4
Megophrys major	22°54'	103°41'	2056.8	7	11	71.5	0.85	2	12.58	0.32	semiaquatic	85.8	50	no
Megophrys minor	29°34'	103°24'	812.6	6	14	48.08	0.51	3	15.54	0.45	semiaquatic	75	48	no
Megophrys omeimontis	29°34'	103°24'	805	5	11	48.08	0.51	3	15.54	0.45	aquatic	75
Megophrys parva	22°0'	100°54'	658.7	10	12	79.67	1.03	6	21.29	0.15	terrestrial	0.6
Megophrys shapingensis	29°1'	102°22'	2002.1	7	13	127	0.75	2	12.79	0.39	semiaquatic	143.8
Megophrys spinata	26°24'	108°13'	1080	8	13	101.08	0.45	0	13.08	0.52	semiaquatic	143.6
Microhyla berdmorei	22°0'	100°54'	658.7	9	13	79.67	1.03	6	21.29	0.15	semiaquatic	0.6	66	no
Microhyla butleri	19°59'	110°29'	23.7	8	11	102.67	0.47	0	18.92	0.35	semiaquatic	0.8	60.5	no
Microhyla heymonsi	26°30'	108°10'	276	6	11	91.75	0.42	0	14.83	0.47	semiaquatic	116
Microhyla mixtura	26°30'	108°10'	786	8	10	91.75	0.42	0	14.83	0.47	semiaquatic	107.2
Microhyla ornata	30°49'	106°4'	280	16	18	43.75	0.64	6	19.29	0.39	semiaquatic	164.8	49	no
Microhyla pulchra	25°58'	108°23'	276	9	16	102.67	0.47	0	18.92	0.35	semiaquatic	98
Micryletta inornata	21°55'	101°16'	572.3	10	12	61	0.92	7	23.42	0.14	semiaquatic	3.6
Nanorana parkeri	30°31'	91°5'	4200	1	4	41.67	0.62	0	1.58	4.34	semiaquatic	179	28.5	yes
Nanorana pleskei	32°58'	103°20'	3405.8	2	5	97.58	0.51	0	2.88	2.13	aquatic	184.4	28.5	yes
Nanorana ventripunctata	27°33'	99°19'	1900	8	12	89.25	0.78	1	6.58	0.82	semiaquatic	96.4
Nidirana leishanensis	26°22'	108°9'	1259.2	6	12	101.08	0.45	0	14.92	0.45	semiaquatic	120.8
Nidirana yeae	28°36'	106°26'	1147.4	6	11	98.75	0.48	0	13.71	0.49	semiaquatic	107
Occidozyga lima	19°59'	110°29'	23.7	10	16	77.75	0.63	6	24.83	0.14	aquatic	0.8
Occidozyga martensii	22°0'	100°54'	658.7	10	13	79.67	1.03	6	21.29	0.15	aquatic	0.6
Odorrana grahami	25°3'	102°35'	2221.8	4.8	11.5	58.42	0.8	6	13.29	0.34	aquatic	53.4	58	no
Odorrana graminea	28°36'	106°25'	1140.6	7	12	116	0.9	5	19.29	0.14	aquatic	103.6
Odorrana hainanensis	18°43'	109°52'	913.2	7	13	116	0.9	5	19.29	0.14	semiaquatic	1	61.5	no
Odorrana hejiangensis	28°36'	106°25'	1140.6	5	13	98.75	0.48	0	13	0.52	aquatic	103.6	66	no
Odorrana huanggangensis	26°22'	108°11'	1259.2	7	11	101.08	0.45	0	14.92	0.45	semiaquatic	132.6
Odorrana kuangwuensis	32°41'	106°59'	1531.9	3	6	118.67	0.69	1	10.38	0.73	aquatic	109
Odorrana kweichowensis	28°7'	107°9'	725	6	13	106.33	0.46	0	15.92	0.44	aquatic	96.8
Odorrana lungshengensis	26°22'	108°11'	1523.4	7	12	101.08	0.45	0	14.92	0.45	aquatic	155.6
Odorrana margaretae	28°7'	107°9'	725	6	13	106.33	0.46	0	15.92	0.44	aquatic	96.8	57	no
Odorrana nanjiangensis	32°35'	106°33'	789.2	5	10	99	0.64	2	13.75	0.53	aquatic	103.2	56.5	no
Odorrana nasuta	29°12'	103°48'	391.4	7	12	87.5	0.56	2	18.42	0.38	aquatic	50.2
Odorrana schmackeri	22°54'	103°41'	2056.8	6	11	71.5	0.85	2	12.58	0.32	aquatic	107
Odorrana tiannanensis	18°43'	109°52'	913.2	9	11	116	0.9	5	19.29	0.14	semiaquatic	1
Ophryophryne microstoma	22°57'	103°46'	870	7	9.3	71.5	0.85	7	20.46	0.2	terrestrial	4.4
Oreolalax rugosus	28°55'	102°13'	2300	7	10	127	0.75	0	9.5	0.54	aquatic	146.6
Paa boulengeri	29°36'	103°21'	931.6	3	6	123	0.69	2	14.29	0.49	aquatic	71.8	66.5	no
Paa robertingeri	28°36'	106°25'	1140.6	5	13	98.75	0.48	0	13	0.52	aquatic	103.6
Paa sichuanensis	25°57'	100°23'	2261.4	3	7	74.17	1.02	6	13.21	0.37	aquatic	7.2
Paa yunnanensis	25°3'	102°35'	2221	5.5	7.3	58.42	0.8	6	13.29	0.34	aquatic	123.2	59	no
Pelophylax fukienensis	26°7'	119°13'	100	8	13	122.33	0.57	0	20.96	0.29	semiaquatic	45.4
Pelophylax hubeiensis	29°47'	106°16'	300	8	12	59	0.51	3	18.88	0.39	semiaquatic	86	50.5	no
Pelophylax nigromaculatus	30°50'	106°6'	310	9.8	12.3	43.75	0.64	6	19.29	0.39	semiaquatic	95.6	63	no
Pelophylax pleuraden	25°3'	102°35'	2221.8	2	7	58.42	0.8	6	13.29	0.34	semiaquatic	68.8	50	no
Philautus gracilipes	23°0'	103°41'	1496	4.5	9.8	71.5	0.85	6	17.63	0.23	arboreal	7.2
Philautus jinxiuensis	22°54'	103°41'	2056.8	6	11	71.5	0.85	2	12.58	0.32	arboreal	72.6
Philautus odontotarsus	23°0'	103°41'	1420	4.8	12.3	71.5	0.85	6	17.63	0.23	arboreal	28
Polypedates braueri	23°1'	103°42'	1337.9	6	12.3	71.5	0.85	6	17.63	0.23	arboreal	16
Polypedates impresus	22°45'	101°00'	1355.7	7.5	10.3	98.75	0.96	4	19	0.18	arboreal	0.6
Polypedates megacephalus	29°50'	106°23'	750	8	11	59	0.51	3	16.79	0.43	arboreal	108.6	33	yes	3.5
Polypedates mutus	25°58'	108°23'	276	6	12	102.67	0.47	0	18.92	0.35	arboreal	69.2	32.5	yes
Pseudorana weiningensis	26°22'	108°11'	1259.2	7	13	101.08	0.45	0	14.92	0.45	semiaquatic	136.8
Rana chaochiaoensis	27°10'	102°35'	1800	7	13	73.75	0.83	5	15.33	0.35	semiaquatic	64
Rana chensinensis	29°8'	107°19'	1103	6	10	125.83	0.57	0	13.96	0.5	semiaquatic	103.4	31.5	yes
Rana hanluica	26°22'	108°09'	1277	7	12	101.08	0.45	0	12.46	0.54	semiaquatic	147.6
Rana kukunoris	32°34'	102°57'	3414.8	3	12	90.42	0.55	0	4.92	1.26	semiaquatic	250.8	28	yes
Rana omeimontis	29°36'	103°21'	931.6	6	14	123	0.69	2	14.29	0.49	semiaquatic	71.8	35	yes	0.041
Rhacophorus chenfui	29°36'	103°21'	931.6	3	7	123	0.69	2	14.29	0.49	arboreal	75
Rhacophorus dennysi	27°52'	108°27'	730	4	10	92.08	0.38	0	16.54	0.44	arboreal	72.6	37.5	yes
Rhacophorus dugritei	29°35'	103°17'	1650	2	6	123	0.69	1	13.29	0.53	arboreal	73.8			8.6
Rhacophorus feae	22°56'	103°41'	1721.6	6	11.3	71.5	0.85	5	16.71	0.25	arboreal	57.4
Rhacophorus hongchibaensi	33°6'	107°6'	1450	5	11	56.42	0.64	4	16.63	0.46	arboreal	144.6	40	yes
Rhacophorus hungfuensis	30°55'	103°30'	910	3	9	89.75	0.53	1	15	0.48	arboreal	69.4
Rhacophorus omeimontis	30°32'	106°56'	1662.4	6	9	75.92	0.63	3	16.96	0.44	arboreal	180.2	39.5	yes	20.5
Rhacophorus rhodopus	20°0'	100°44'	570.2	8	12	109	0.93	6	24.83	0.11	arboreal	0.6
Scutiger chintingensis	29°31'	103°20'	3050	3	9	123	0.69	2	14.83	0.48	terrestrial	214.4
Scutiger glandulatus	31°43'	103°4'	2700	2	5	63.25	0.67	0	3.33	1.67	aquatic	77.8
Scutiger muliensis	28°33'	100°56'	3100	3	5	80.5	0.96	4	7.54	0.76	aquatic	105.6
Xenophrys leishanensis	26°22'	108°11'	1523.4	7	13	101.08	0.45	0	14.92	0.45	semiaquatic	156.2
Xenophrys wushanensis	30°36'	109°26'	1300.8	5	10	145.75	0.59	0	12.04	0.59	semiaquatic	115.6
