# Supplementary material for: How hibernation in frogs drives brain and reproductive evolution in opposite directions
Source: eLife. 2023 Dec 12;12:RP88236. doi: 10.7554/eLife.88236 (PMC10715729; doi:10.7554/eLife.88236)
Supplement: Source data 2. — Snout-vent length (SVL), body mass and the size of all relevant tissues and organs. N = sample size. [file elife-88236-data2.xlsx]

## Sheet: Sheet1
Data S2. Morphological data of male anurans in breeding (post-brumation) condition. Snout-vent length (SVL), body mass and the size of all relevant tissues and organs. N = sample size.
Species	N	SVL (mm)	Brain mass (mg)	Body mass (g)	Body fat (mg)	Digestive tract mass (mg)	Digestive tract length (mm)	Heart mass (mg)	Lung mass (mg)	Liver mass (mg)	Kidney mass (mg)	Spleen mass (mg)	Foreleg muscle mass (mg)	Hindleg muscle mass (mg)	Testes mass (mg)
Amolops chunganensis	4	35.6	38.6	4.3	13.4	107.7	56.7	21.6	16.2	145.9	40.2	1.3	77.3	525.5	32
Amolops granulosus	2	32.6	35.5	3.2	15.1	115.5	68.9	1.2	8.6	79.4	18.2	2	65.1	505.2	13.4
Amolops kangtingensis	2	51.9	36.1	3.1	12.5	92.2	53.6	8.3	3.8	117	5.4	1.2	23.9	245.8	30.2
Amolops lifanensis	4	52.8	61.7	13.6	87.4	514.2	101.6	98.5	32.8	497.6	80.5	10.9	986.9	1779.6	66.3
Amolops loloensis	3	52.4	47.2	23.9	250.9	1152.7	148.6	133.6	26.1	973.5	118.8	46.4	1088.6	5325.9	53.8
Amolops mantzorum	4	53.8	70.3	12.9	73.6	374.1	87.3	48.7	38	250.8	60.3	7.8	705.3	2535.6	135.2
Amolops ricketti	3	51.8	58.9	14.2	88.2	432.7	55.2	24.5	28.8	430.8	58.2	10.8	303.3	2508	40.2
Amolops sinensis	4	52.6	41	13.6	51	625	56.6	24.9	33.2	428.4	59.4	6.8	318.2	2985.9	147.1
Amolops torrentis	2	53.5	60.8	7.2	10.7	264.2	70.7	10.9	30.3	145.3	45.3	7.2	143.6	1599.5	28.2
Amolops yunkaiensis	2	45.1	55.3	17	98.5	753.7	69.4	12.1	30.3	135.3	43.8	9.2	165	1580.6	42.4
Aquixalus palpebralis	4	27.1	20.6	1.1	1.1	30.3	22.4	3.7	6.4	16.4	2.8	0.7	18.7	122.3	2.2
Babina daunchina	4	48.3	63.4	10.6	32.9	351.6	77.8	43.4	33.8	210.2	51.2	2.6	400.8	1777.7	90.6
Bombina maxima	4	58.1	33.8	24.4	143.2	1452.1	77.9	89	142.7	441.6	120	4.3	462.9	1522.5	166.3
Brachytarsophrys chuannanensis	2	104.1	82.4	97.9	992.9	3946	181.9	944.4	1024.6	2628.5	634.6	31.4	3813.9	21498	1048
Brachytarsophrys feae	1	95.6	65.3	88.5	962.7	4964	132.6	821.5	564.3	1143.2	342.1	11.2	1756.4	12865.7	917.2
Bufo andrewsi	4	74.7	83.6	38	349.2	1767.7	165.1	182.5	530.3	637.2	189.1	44.8	1285.9	9131.3	232.4
Bufo gargarizans	4	99.5	221	116.2	490.8	2538.6	249.9	838.7	1766.2	3441.3	740.1	96	4554.6	25433.4	517.4
Bufo melanostictus	4	64.4	47.8	16.5	164.2	958	113.9	66.9	141	381.7	79.1	4.2	665.5	1109	164.2
Bufo minshanicus	4	67.5	59.5	23.1	289.4	969.6	140.4	148.1	320.8	1172.5	196.4	9.7	2203.2	4238.2	261.7
Bufo raddei	3	45.1	35	25.6	115.9	1382	85.1	46.4	123.1	197.3	84.2	7.5	237	593.5	222.6
Bufo tibetanus	4	64.9	61.2	26.6	311.5	1181	126.3	142.7	323.4	1470.3	197	24.7	928.8	2514.5	183.3
Calluella yunnanensis	3	31.7	19.5	3.4	19.9	175.4	65.2	20.2	14.7	46.5	14.7	1	40.8	374.7	6
Chirixalus doriae	4	26.1	19	1.1	1.3	28.7	35.9	10.6	3	81.9	2.7	4.7	14.5	100.9	9.3
Chirixalus vittatus	4	24.1	10.1	0.8	1.1	22	19	9.4	3.7	41	2.5	1.2	5.8	53	5.8
Feirana quadranus	4	71.1	149	52.3	312.6	2525.1	201.3	66	76.8	986.9	153.9	48.5	1226.2	8560.3	736.4
Fejervarya multistriata	4	37.5	33.3	5.2	41.4	156.8	56.4	20.8	14.5	137.2	19.2	1	162.6	543.3	50.2
Hyla annectans chuanxiensis	3	33	23.2	2.4	5.1	67.4	38.9	11.6	17.4	52.1	8.8	0.9	55.2	212.7	9.1
Hyla annectans jingdongensis	5	33.5	27	2.5	4.1	101.2	45.1	17.2	22.9	45.6	14.4	1.7	51.7	205.6	13
Hyla annectans wulingensis	4	33.9	24	2.3	3.4	75.3	40.5	8	7.2	16.1	6.8	2.1	31.4	126.8	3.3
Hyla chinensis	4	28.2	25.1	2.6	2.5	68.4	39.7	16.3	19.8	46.7	12.5	3.1	66.5	246	4.2
Hyla sanchiangensis	4	33.9	24.6	2.4	2.1	101.9	41.5	8.2	9.3	26.6	6	1.2	39.7	151.4	4.7
Hyla tsinlingensis	4	36.7	27.4	3.9	14.5	158.7	64.3	17.4	15	78.6	20.7	2.9	41.1	191.4	38.5
Hylarana guentheri	4	58.8	78.3	20.1	202.6	616.8	119.9	96.7	156.5	368	68.4	23.8	458.9	4731	184.7
Hylarana nigrotympanica	2	44	52.5	8.2	21.8	439.7	67.9	36.6	58.7	162.1	41.5	4.9	184.8	1483.2	12.3
Kaloula pulchra	2	74.6	87.4	28.9	169.1	1346.5	135.5	32.9	110.2	701.2	406.7	16.2	491.8	2677.3	43.8
Kaloula rugifera	4	38.9	20.9	5.7	23.2	155.9	76.6	35.3	107.6	116.4	19.7	0.3	190.1	580	19.2
Kaloula verrucosa	4	39.2	39.9	5.8	18.9	246.2	55	34.7	95.1	119.6	33.8	1.1	121.6	952.1	15
Leptobrachella bijie	2	28.3	22.2	1.6	5.3	53.7	38	6.9	30.8	13.9	7.3	1	28.1	249	8
Leptobrachella feii	4	22.6	16.4	1.3	3.7	35.6	25	3.6	3.8	27.6	4.9	0.8	14.6	120.2	4.2
Leptobrachium boringii	4	60.2	65.2	16	141	527.9	67.6	67.3	21.6	325.3	71.3	4.5	521.6	2293.6	68.5
Leptolalax oshanensis	4	29.6	15.2	1.9	3.2	88	41.5	3.7	1.6	24.3	3.9	0.8	16.4	259.6	5.9
Leptolalax ventripunctatus	4	25.8	16.8	1.3	5.3	57	36.4	4.4	3.3	23.1	5.6	0.6	12.6	186.2	6
Limnonectes fujianensis	4	52.6	58.9	17.2	176.5	546.9	112.1	28	52.2	216	60.7	2.3	224	2092.8	23.7
Lithobates catesbeianus	2	135.6	261.8	237	2851.2	8518.4	312.6	1211.2	1382.8	3499.2	1214.6	428.1	6123.5	30667.8	2413.8
Megophrys daweimontis	2	40.1	36.5	5.1	15.6	124.3	41.8	13.3	9.4	57.6	18.2	0.5	61.2	605.1	41.6
Megophrys jingdongensis	2	29.8	26.3	2.5	8.8	83.9	36.7	8.3	13.6	36.5	16	0.3	41.8	365.1	15.7
Megophrys kuatunensis	4	29.2	17.6	1.8	6.3	60.2	37.3	5.6	6.8	48.5	6.6	0.2	20.9	187.6	4.5
Megophrys major	2	51.1	79	14	48.7	653.5	88	38.9	46.7	392.8	38.6	3.3	325.2	2190.4	139.9
Megophrys minor	4	42.1	38.1	4.5	8.6	179.5	84.1	35	27.9	140	29.4	0.7	109.2	744.2	15.6
Megophrys omeimontis	2	60.4	88.9	18.4	88.2	582.2	97.3	73	100.5	450.4	77.5	1.6	420.3	3384.3	262.5
Megophrys parva	2	38.3	31.2	3.8	9	204.8	61.6	10.5	19.8	71.6	15	1.1	75.1	468.4	17.5
Megophrys shapingensis	2	72.6	47.2	72.9	564.3	1624.5	129.8	321.4	168.9	2314.5	679.2	13.5	1058.2	8156.3	246.9
Megophrys spinata	4	47.6	40.1	8.9	93.8	326.3	69.4	44.1	35.3	215.8	39.6	2	290.9	1893.8	151.4
Microhyla berdmorei	2	23.2	15.7	2.4	16.8	114.2	53.1	12.1	4	33.8	12.1	2.3	85.8	677.7	16.7
Microhyla butleri	4	21	8.9	0.9	1.9	34	40.9	6.4	5.9	22.3	8.8	0.4	9.4	113	7.4
Microhyla heymonsi	4	21.4	9.4	0.9	2.2	38.2	29.5	2.9	3.6	16.8	3.4	0.1	17.1	95.9	7
Microhyla mixtura	4	20.8	4.3	0.8	5.6	40.2	32.6	1.3	1	7.6	2.9	0.1	2.8	40.9	11
Microhyla ornata	4	24.4	12.1	1.3	2.4	60.8	38.2	13.4	15.7	35.5	10.4	0.2	8.1	156.3	16.8
Microhyla pulchra	2	31.5	8.6	3.7	18.5	147.1	55.6	12.5	4.9	42.4	8.5	0.7	14.6	404.6	5.6
Micryletta inornata	2	22.9	11.7	1.2	1.7	56.9	32.4	3.7	1.6	12.2	2.1	0.2	5.4	86.8	4.1
Nanorana parkeri	3	54.7	49.3	7.5	61.2	342.7	95.8	22.3	7.8	89.6	18.6	2.2	67.5	521.7	63.3
Nanorana pleskei	4	31	24.2	3.5	30.8	113.7	87.1	10.6	21	121.4	17.9	1.9	45.6	265	57.5
Nanorana ventripunctata	2	35.5	27.1	4.3	29.2	198.5	47.4	14.3	21.2	70.7	17.1	1.5	47.3	298.6	18.2
Nidirana leishanensis	4	54.7	73.9	15.7	135	472.9	85.5	70.5	48.1	243.1	66.6	8.6	260.2	3026.8	34.9
Nidirana yeae	4	54	52.4	10.2	44.1	337.2	62.2	26.1	68.1	139.9	28.9	1.5	132	1642.7	48.9
Occidozyga lima	4	23.4	15.8	1.6	3.3	54.1	28.2	10.1	6.1	13.1	6.8	0.7	22.4	226	4.2
Occidozyga martensii	4	19.8	13.3	1.5	2.2	83.1	29.1	3.7	16.5	22	8.9	0.7	20.8	241.3	9.3
Odorrana grahami	4	67.6	80.8	23.2	177.8	1249.2	87.3	84.1	115.8	433	111.6	5.6	1465.1	6253.7	53.5
Odorrana graminea	4	47.4	54.7	7.7	31.3	262	56.7	15.2	16.1	110.5	41.8	5.9	175.2	1461	18.1
Odorrana hainanensis	4	52.7	62.6	12.5	31.8	409	81.4	20.1	20.4	177.2	33.2	1.7	322.7	2182.6	20.7
Odorrana hejiangensis	4	46.6	40.4	7.2	50.6	324.5	76.5	23.7	152.8	151.3	32.9	7.6	443.1	1467.4	79.2
Odorrana huanggangensis	3	43.6	51.4	5.6	25.5	231.9	63.8	7.9	6.8	78.9	13.9	3	73.2	618.7	86.3
Odorrana kuangwuensis	4	56.4	37.5	3.7	15.4	129.1	65	61.2	13.8	19.4	55.5	1.8	104.4	911.5	25.1
Odorrana kweichowensis	2	44.8	62.3	6.7	32.1	255.2	61.7	24.1	33.3	163.7	33.6	5.6	181.9	1059.2	17.9
Odorrana lungshengensis	3	68.1	88.3	18.3	202.9	929.1	99.4	54.1	56.8	506.8	83.8	8.3	546.8	3655.3	139.7
Odorrana margaretae	4	72	85.6	23.2	67.3	543.2	97.4	154.1	156.4	643.9	142.8	40.2	1352.3	7244.8	56.5
Odorrana nanjiangensis	4	57.5	76	12.5	79.8	491.5	103.5	58.4	65.6	364.7	86.3	30.8	394.7	2353	42.2
Odorrana nasuta	4	59.5	81.2	15.6	74.3	422.2	70.4	27.8	30	230.9	45.4	7.1	360.5	2601.1	32.2
Odorrana schmackeri	4	47.7	43.3	8.1	44.5	258.6	72.5	24.5	44.8	279.5	14.8	6.6	125.1	2683.4	47.9
Odorrana tiannanensis	2	64.2	132.2	21.6	91.7	932.9	108.5	83	54.3	512.9	85.1	7.7	698	5377.8	47.1
Ophryophryne microstoma	2	29.1	19.6	1.6	2.1	41.3	36.1	4.3	4.7	45.5	6.2	0.2	19.8	199.6	6.1
Oreolalax rugosus	2	48.9	34.5	9.2	74	392.4	88.7	42.3	22.3	141.9	32.8	1.1	356.4	1017.8	20.4
Paa boulengeri	4	73.5	62.5	46.1	532.8	2700	170	122.7	238.5	803.9	200.7	12.2	2082.2	9955.5	348.1
Paa robertingeri	4	77.5	100.5	53.6	415.1	3058.5	130.8	100.3	164.7	686.2	139.3	21.5	856.8	9115.7	281.5
Paa sichuanensis	2	91.1	152.3	80.9	579.2	4519.3	193.5	346.3	272.2	1923.1	305.6	46.3	3660.2	17948.7	494.6
Paa yunnanensis	4	60.6	80.1	20.1	243	871.4	187.9	166.7	216.2	696.2	201	59.6	1552.2	7962.1	450.7
Pelophylax fukienensis	4	51.1	69.2	10.4	41.3	368.8	67.9	24.8	178.6	211.5	40.8	4.5	184.8	2242.4	47.4
Pelophylax hubeiensis	4	41.8	23	11.2	63.7	668.9	59.9	13.8	36.1	280.2	33	2.9	103.2	638	167.7
Pelophylax nigromaculatus	4	67.9	76.8	26.4	259.4	877.7	143.5	63.2	127.8	566.2	127	44.1	784.9	5304	290.7
Pelophylax pleuraden	4	54.5	50.7	12.8	143.1	474.1	69.6	28.4	95	347.9	81.1	9.9	336.4	1984.7	30.8
Philautus gracilipes	1	21.6	11.8	0.6	0.6	11.9	26.8	3.1	1.9	11	3.3	0.1	9.9	75.3	0.7
Philautus jinxiuensis	4	27.5	25.5	1.3	1	28.3	34.5	6.6	2.3	61	8.7	0.2	19	183.6	12.1
Philautus odontotarsus	4	30	26.3	1.6	2.1	55.9	36.1	5	5.7	22.1	8.9	0.8	31.3	197.1	1.4
Polypedates braueri	4	45.7	56	4.6	6.4	174.2	54.5	32.2	43.4	98.9	35.2	14.6	66.8	608	58.7
Polypedates impresus	4	45.4	48.5	4.5	5.4	202	58.2	35	48.8	102.4	34.4	15	84.1	673.6	109.1
Polypedates megacephalus	4	43.6	50	7.4	30.2	235.9	46.8	13.7	19.8	62.3	20.1	0.7	92.5	823.9	99.8
Polypedates mutus	4	40.1	40	5.7	18.6	202.5	56.5	16.1	18.7	64.7	15.3	0.9	73.2	646.9	120.2
Pseudorana weiningensis	4	36.2	24.4	3.3	4.4	179.2	52.4	7	11.3	47.8	13.4	0.2	43.9	558.1	33.2
Rana chaochiaoensis	4	50.4	51.1	12	41.9	458.1	63.3	22	43	85.4	25.8	0.9	169.9	1702.5	25.3
Rana chensinensis	4	44.3	33.9	5.6	57.2	276	104.4	16	23.3	122.7	26.4	2.6	128.4	1012.2	30.1
Rana hanluica	6	48.4	47.2	7.1	46.4	314.6	69.1	55.8	22.5	107.5	75.5	2.7	93.1	1521.3	9.5
Rana kukunoris	4	49.4	43.3	5.1	33.4	167.8	72.9	54	46.2	272.4	41.5	4.4	193.5	1572	136.4
Rana omeimontis	4	51.5	57.3	10.7	37.6	329.4	52.4	25.6	48.4	111.8	28.7	3.5	204.8	2013.5	11.7
Rhacophorus chenfui	4	38.6	33.5	5.8	34.6	329.4	53.7	44.8	13.4	164.3	23.6	7.4	48.5	856.5	116.5
Rhacophorus dennysi	4	74.9	106.3	33	244.1	1060.2	87.9	113.7	175	338.4	137.6	24.5	1076.5	4261.7	427.6
Rhacophorus dugritei	4	42.2	42	4.4	15.7	169.5	53	22.6	52.9	100.9	46.8	2.5	94.8	733.4	52.4
Rhacophorus feae	4	104.4	172.5	63.4	501	1844	103.1	382.6	370.5	1016	399.1	40.2	2436.8	10919.1	1792.2
Rhacophorus hongchibaensi	4	65.8	47.3	5.3	47.3	198.8	86.7	38.7	48.6	88.6	49.8	3.1	98.9	813.7	102.3
Rhacophorus hungfuensis	4	35.1	32.1	6.1	36.8	299.9	99.5	40.2	61.2	121.1	50.3	4.6	112.4	892.2	63.6
Rhacophorus omeimontis	4	59.8	66.7	11.4	51.1	357.8	61.7	61.4	106.5	192.3	64.1	7.9	310.1	2030.8	367.9
Rhacophorus rhodopus	3	35.5	58.8	6.8	7.7	276.5	78.6	66.9	109.8	178.9	55.8	4.5	297.2	1917.5	47.9
Scutiger chintingensis	2	43.2	27.7	7.6	34.6	251.3	64.1	10.5	20.8	88.7	28.2	1.5	138.9	393.7	161
Scutiger glandulatus	2	64.2	67.7	27.3	293.4	1564.1	92.2	185.6	139.1	1262.5	133.8	13.3	266	1463.7	121.9
Scutiger muliensis	2	75	107.6	62.9	767.9	3461.7	175.1	559.2	154.5	3028.3	506.9	27.4	744.1	5038.3	205
Xenophrys leishanensis	2	33.5	19.5	3	15.8	89	47.7	5.1	3.9	71.9	7	0.2	18.3	246.1	33.5
Xenophrys wushanensis	4	52.2	46.9	10.3	57.8	317.9	77.6	45.1	30	233.5	46	3.2	252.3	1471	131.7
