# Supplementary material for: How hibernation in frogs drives brain and reproductive evolution in opposite directions
Source: eLife. 2023 Dec 12;12:RP88236. doi: 10.7554/eLife.88236 (PMC10715729; doi:10.7554/eLife.88236)
Supplement: Source data 3. — Snout-vent length (SVL), body mass and the size of all relevant tissues and organs. N = sample size. [file elife-88236-data3.xlsx]

## Sheet: Sheet1
Data S3. Morphological data of male anurans in pre-brumation condition. Snout-vent length (SVL), body mass and the size of all relevant tissues and organs. N = sample size.
Species	N	SVL (mm)	Brain mass (mg)	Body mass (g)	Body fat (mg)	Digestive tract mass (mg)	Digestive tract length (mm)	Heart mass (mg)	Lung mass (mg)	Liver mass (mg)	Kidney mass (mg)	Spleen mass (mg)	Foreleg muscle mass (mg)	Hindleg muscle mass (mg)	Testes mass (mg)
Amolops chunganensis	2	36	41.5	4.6	43.6	88.9	49.8	23.2	15.8	144.3	42.1	2.1	79.2	632.3	3.8
Amolops lifanensis	2	51.4	37.9	15.9	198.4	837.7	121.1	52.9	41.3	540	69.9	7.8	911.2	1855.3	4.7
Amolops loloensis	2	56.2	47.2	23.5	301	1171.8	148.5	133.6	26.1	973.5	118.8	46.4	1001.2	5413.3	12.4
Amolops mantzorum	2	47.7	56.7	10.3	197.3	356.1	88.3	32.6	33.4	197.2	44.3	5.8	688	2041.6	18.9
Amolops sinensis	2	50.5	42.4	14.7	191.7	594.4	58	24	24.9	471.7	57.7	8.2	301.2	2984.1	29.1
Babina daunchina	2	43.7	38.8	9.2	65.7	274.1	87.7	26.5	24.1	245.8	41.6	2	327.5	2058.4	19.7
Bombina maxima	2	55.1	44.7	24.4	257.6	1406.1	80.3	95.6	121.3	379.4	115.7	4.7	499.2	4545.1	65.2
Bufo andrewsi	4	72.2	79.7	34.3	465.7	1058.2	106.6	139.4	392.6	571.5	159.6	22.9	1244.2	5229.5	37.1
Bufo gargarizans	4	91.7	158.5	111.2	1093	5938.5	267.7	783.6	1567.4	3959.4	379	33.5	4984.3	9712.9	244.3
Bufo melanostictus	4	67.4	72.3	33.2	557.6	1155.4	172.4	217.7	496	1728.1	278.2	23.5	623.6	1463.3	62.6
Bufo minshanicus	2	67.9	64.2	34.3	774.2	1336.3	103.5	48.9	186	724.4	100.8	21.4	2222.9	4634.5	106.4
Calluella yunnanensis	2	31.2	19.8	3.1	19.2	143.9	67.9	17	10.9	30.8	8	1.2	36.8	275.5	3.1
Feirana quadranus	4	68.4	122.2	41.6	428.2	1227.1	201.3	105.7	103.4	718.7	127.4	10.9	1176.5	11751	261.2
Fejervarya multistriata	4	40.9	34.9	8	127.3	258.4	44.5	44	28.9	434.9	32	12.4	152.1	1249.8	10.4
Hyla annectans jingdongensis	2	33.4	31.1	2.4	4.9	43.7	45.1	12.3	20.2	39	11.7	0.5	47.7	264.9	10.7
Hyla tsinlingensis	2	31.6	12.7	2.1	16.5	88.7	67.9	17.4	17.5	25	6.6	1.4	43.6	200	11.3
Hylarana guentheri	2	63.1	70.3	18	336.3	988.9	98	44.8	31.9	604.5	79.3	65.1	423.9	4210.7	33.2
Kaloula rugifera	2	38.9	19.9	7.6	59.8	351.2	82.5	37.5	154.5	135.1	25.1	0.8	187.3	766	14.8
Kaloula verrucosa	2	37	38.3	4.7	20.6	159.1	47.9	26.5	74.9	102	25.5	4.2	123.2	831.3	10.5
Lithobates catesbeianus	2	96.7	140.7	87.3	2401.2	6637.2	464.3	415.2	283	2654.5	449.8	59.8	3123.8	9132.3	239.4
Megophrys spinata	2	47.6	40.1	8.9	190.1	305	66	36.1	19.6	197.8	28.5	2.3	222.1	1404.9	31.4
Microhyla ornata	2	24.5	9.6	1.3	17.4	45.1	37.1	13.2	16.5	32.7	10.3	0.3	20.6	137.6	1.9
Nanorana pleskei	2	29.8	19.6	3.3	51.1	80.1	79.8	10.9	24.9	94.3	14.1	2	55.3	243.6	39.6
Nanorana ventripunctata	2	35.1	31.3	3.4	26.3	68.6	47.4	15.4	21.9	66.4	17.4	6.3	43.2	861.2	13.2
Nidirana leishanensis	2	55.6	74.7	15.9	164.5	423.7	84.7	84.6	48.9	248.6	74.8	8.2	256.2	3002.9	12.8
Occidozyga lima	2	23.3	15.7	1.6	3.6	59.3	30.1	12.4	7.2	14.3	6.7	0.6	30.4	241.8	4.1
Occidozyga martensii	2	23	14.8	1.9	4.5	68.5	35.8	14.5	3.5	12.2	5.7	0.8	19.8	198.1	9.7
Odorrana grahami	4	65.7	112	24.3	193.8	592.7	75.8	49.4	58.4	270.7	77.9	2.8	1433.7	3627.8	17.4
Odorrana graminea	4	48.5	58.7	8.2	38.2	363.8	50.8	16.3	17.7	176	27	7.3	169.2	1528.8	16.2
Odorrana hejiangensis	4	46.6	40.4	7.5	105.3	344.7	98.3	25.8	198.7	169.3	37.6	9.2	446.7	1542.1	16.3
Odorrana huanggangensis	4	44.3	53.3	6	83.5	237.2	67.7	34.7	13.5	146.5	58.2	1.1	80.2	776.7	65.3
Odorrana margaretae	4	70.3	85.6	29.6	281.4	1686.7	97.4	154.1	156.4	643.9	142.8	40.2	1359.8	8195.9	74.1
Odorrana nanjiangensis	4	51.8	72.3	13	119.6	572.2	109.2	61.8	60.1	406.2	90.2	21.9	389.6	2383.9	37.8
Odorrana nasuta	2	57.9	79.2	15.2	93.5	393.5	73.1	24.2	26.8	203.8	58.9	6.2	371.5	2421.1	23.2
Odorrana schmackeri	2	43.4	47.5	7.6	55.1	257.3	66.5	17.9	13.5	234.8	43.5	2.8	123.4	1098.2	16.5
Paa boulengeri	4	73.5	83.5	52.8	712.6	3118.6	155.6	140.6	293.5	855.8	240.2	16.3	2155.2	11664.1	318.3
Paa yunnanensis	2	65.3	75.8	40.1	709.2	2374.6	206.8	153	223.9	790.5	218.9	83.9	1563.7	9454.6	569.2
Pelophylax hubeiensis	2	43.4	38.4	7.6	122.6	228.8	77.4	12.2	39.1	215.2	19.5	2.3	104.9	533.1	18.9
Pelophylax nigromaculatus	4	53.4	70.6	18.3	395.8	836.2	137.1	49.6	168.5	790.9	79.3	13.2	744.7	2407.1	41.2
Pelophylax pleuraden	4	51.4	58.6	13.4	170.7	525.2	84.2	39.8	62.3	287.4	55.9	2.1	326.3	4101.2	13.7
Polypedates megacephalus	4	39.6	41.4	4.1	39.3	140.2	46.5	12	17.1	50.2	17.9	0.8	88.5	676.1	61.9
Polypedates mutus	2	40.2	44.5	4.4	20.7	116.8	50.9	14.7	12.9	77.1	14.9	1.6	81.6	699.1	26.8
Pseudorana weiningensis	2	36.2	11.5	3.3	27.6	106	50.8	7.3	11.5	41.5	14.4	0.8	41.5	530.6	2.4
Rana chaochiaoensis	2	42.4	47.5	5.1	34.6	129.9	93.9	16.5	22.3	272.3	58.9	3.6	170.6	968.3	4.4
Rana chensinensis	2	44.3	26	5	43.9	280.1	79.8	18.7	20.6	74.3	21.9	7.4	115.7	785.4	4.9
Rana kukunoris	2	49.7	27.8	10.3	230.3	275.6	72.9	54.1	46.2	272.4	41.5	4.4	183.9	1581.6	4.8
Rana omeimontis	4	48.6	52.1	6.4	33.5	209.5	51	18.3	75.8	95.9	16.5	0.7	214.7	3740	3.5
Rhacophorus chenfui	2	38.6	33.5	5.8	41.2	108.8	53.7	44.8	13.4	164.3	23.6	7.4	46.3	858.7	106.6
Rhacophorus dugritei	2	39.8	41.6	4.8	33.9	174.5	55.2	17.5	45.9	78.3	43	1.6	90.6	658.1	36.9
Rhacophorus omeimontis	2	55.9	54.4	9.5	148.4	335.9	57.9	43.7	57.9	303.2	52.8	15.8	302.5	1522.6	177.9
