# Supplementary material for: How hibernation in frogs drives brain and reproductive evolution in opposite directions
Source: eLife. 2023 Dec 12;12:RP88236. doi: 10.7554/eLife.88236 (PMC10715729; doi:10.7554/eLife.88236)
Supplement: Source data 5. [file elife-88236-data5.xlsx]

## Sheet: Sheet1
Data S5. Monthly temperatures and precipitation corresponding to the location of each species from 2012 to 2016, based on daily climate data.
Phylo	Latitude	Longitude	Elevation	Year	Month	Temperature	Precipitation
Amolops_chunganensis	32.8333	106.25	836.1	2012	1	1.19677	10.9
Amolops_chunganensis	32.8333	106.25	836.1	2013	1	1.82903	4.6
Amolops_chunganensis	32.8333	106.25	836.1	2014	1	2.71613	5.3
Amolops_chunganensis	32.8333	106.25	836.1	2015	1	2.80645	17.6
Amolops_chunganensis	32.8333	106.25	836.1	2016	1	1.72258	9.1
Amolops_chunganensis	32.8333	106.25	836.1	2012	2	2.45517	16.7
Amolops_chunganensis	32.8333	106.25	836.1	2013	2	5.35357	14.6
Amolops_chunganensis	32.8333	106.25	836.1	2014	2	2.59286	16
Amolops_chunganensis	32.8333	106.25	836.1	2015	2	4.50357	17.1
Amolops_chunganensis	32.8333	106.25	836.1	2016	2	3.7	14
Amolops_chunganensis	32.8333	106.25	836.1	2012	3	7.98387	22.6
Amolops_chunganensis	32.8333	106.25	836.1	2013	3	12.5226	16.9
Amolops_chunganensis	32.8333	106.25	836.1	2014	3	8.67419	17.8
Amolops_chunganensis	32.8333	106.25	836.1	2015	3	9.57419	37.8
Amolops_chunganensis	32.8333	106.25	836.1	2016	3	9.94194	23.6
Amolops_chunganensis	32.8333	106.25	836.1	2012	4	15.58	25.8
Amolops_chunganensis	32.8333	106.25	836.1	2013	4	14.6967	117.3
Amolops_chunganensis	32.8333	106.25	836.1	2014	4	14.3033	124
Amolops_chunganensis	32.8333	106.25	836.1	2015	4	14.37	111.6
Amolops_chunganensis	32.8333	106.25	836.1	2016	4	14.5167	80.4
Amolops_chunganensis	32.8333	106.25	836.1	2012	5	17.8161	169.1
Amolops_chunganensis	32.8333	106.25	836.1	2013	5	18.1516	249
Amolops_chunganensis	32.8333	106.25	836.1	2014	5	16.8097	91.1
Amolops_chunganensis	32.8333	106.25	836.1	2015	5	18.171	95.1
Amolops_chunganensis	32.8333	106.25	836.1	2016	5	16.8258	168.2
Amolops_chunganensis	32.8333	106.25	836.1	2012	6	23.1968	98.1
Amolops_chunganensis	32.8333	106.25	836.1	2013	6	21.7067	204.5
Amolops_chunganensis	32.8333	106.25	836.1	2014	6	21.2933	119.4
Amolops_chunganensis	32.8333	106.25	836.1	2015	6	21.0667	275.9
Amolops_chunganensis	32.8333	106.25	836.1	2016	6	22.9367	64.1
Amolops_chunganensis	32.8333	106.25	836.1	2012	7	23.1968	388.6
Amolops_chunganensis	32.8333	106.25	836.1	2013	7	23.5129	410.6
Amolops_chunganensis	32.8333	106.25	836.1	2014	7	24.0516	88.9
Amolops_chunganensis	32.8333	106.25	836.1	2015	7	23.029	120.8
Amolops_chunganensis	32.8333	106.25	836.1	2016	7	23.8161	172.3
Amolops_chunganensis	32.8333	106.25	836.1	2012	8	23.171	197.4
Amolops_chunganensis	32.8333	106.25	836.1	2013	8	24.3903	142.1
Amolops_chunganensis	32.8333	106.25	836.1	2014	8	22.1452	151.5
Amolops_chunganensis	32.8333	106.25	836.1	2015	8	22.0484	127.2
Amolops_chunganensis	32.8333	106.25	836.1	2016	8	24.371	84.8
Amolops_chunganensis	32.8333	106.25	836.1	2012	9	17.7267	120.6
Amolops_chunganensis	32.8333	106.25	836.1	2013	9	18.54	136.6
Amolops_chunganensis	32.8333	106.25	836.1	2014	9	18.5467	243.7
Amolops_chunganensis	32.8333	106.25	836.1	2015	9	18.2667	225.2
Amolops_chunganensis	32.8333	106.25	836.1	2016	9	19.2033	84.3
Amolops_chunganensis	32.8333	106.25	836.1	2012	10	13.629	46.4
Amolops_chunganensis	32.8333	106.25	836.1	2013	10	14.8871	38.6
Amolops_chunganensis	32.8333	106.25	836.1	2014	10	14.4097	141.9
Amolops_chunganensis	32.8333	106.25	836.1	2015	10	13.8097	64
Amolops_chunganensis	32.8333	106.25	836.1	2016	10	13.4258	65.8
Amolops_chunganensis	32.8333	106.25	836.1	2012	11	6.90667	29.6
Amolops_chunganensis	32.8333	106.25	836.1	2013	11	7.71667	32.6
Amolops_chunganensis	32.8333	106.25	836.1	2014	11	8.09667	41.2
Amolops_chunganensis	32.8333	106.25	836.1	2015	11	9.01	53.4
Amolops_chunganensis	32.8333	106.25	836.1	2016	11	7.97333	33.1
Amolops_chunganensis	32.8333	106.25	836.1	2012	12	2.45484	9
Amolops_chunganensis	32.8333	106.25	836.1	2013	12	2.64516	3.6
Amolops_chunganensis	32.8333	106.25	836.1	2014	12	2.03548	4.5
Amolops_chunganensis	32.8333	106.25	836.1	2015	12	3.43226	9.7
Amolops_chunganensis	32.8333	106.25	836.1	2016	12	4.18065	5
Amolops_granulosus	32.8333	106.25	836.1	2012	1	1.19677	10.9
Amolops_granulosus	32.8333	106.25	836.1	2013	1	1.82903	4.6
Amolops_granulosus	32.8333	106.25	836.1	2014	1	2.71613	5.3
Amolops_granulosus	32.8333	106.25	836.1	2015	1	2.80645	17.6
Amolops_granulosus	32.8333	106.25	836.1	2016	1	1.72258	9.1
Amolops_granulosus	32.8333	106.25	836.1	2012	2	2.45517	16.7
Amolops_granulosus	32.8333	106.25	836.1	2013	2	5.35357	14.6
Amolops_granulosus	32.8333	106.25	836.1	2014	2	2.59286	16
Amolops_granulosus	32.8333	106.25	836.1	2015	2	4.50357	17.1
Amolops_granulosus	32.8333	106.25	836.1	2016	2	3.7	14
Amolops_granulosus	32.8333	106.25	836.1	2012	3	7.98387	22.6
Amolops_granulosus	32.8333	106.25	836.1	2013	3	12.5226	16.9
Amolops_granulosus	32.8333	106.25	836.1	2014	3	8.67419	17.8
Amolops_granulosus	32.8333	106.25	836.1	2015	3	9.57419	37.8
Amolops_granulosus	32.8333	106.25	836.1	2016	3	9.94194	23.6
Amolops_granulosus	32.8333	106.25	836.1	2012	4	15.58	25.8
Amolops_granulosus	32.8333	106.25	836.1	2013	4	14.6967	117.3
Amolops_granulosus	32.8333	106.25	836.1	2014	4	14.3033	124
Amolops_granulosus	32.8333	106.25	836.1	2015	4	14.37	111.6
Amolops_granulosus	32.8333	106.25	836.1	2016	4	14.5167	80.4
Amolops_granulosus	32.8333	106.25	836.1	2012	5	17.8161	169.1
Amolops_granulosus	32.8333	106.25	836.1	2013	5	18.1516	249
Amolops_granulosus	32.8333	106.25	836.1	2014	5	16.8097	91.1
Amolops_granulosus	32.8333	106.25	836.1	2015	5	18.171	95.1
Amolops_granulosus	32.8333	106.25	836.1	2016	5	16.8258	168.2
Amolops_granulosus	32.8333	106.25	836.1	2012	6	23.1968	98.1
Amolops_granulosus	32.8333	106.25	836.1	2013	6	21.7067	204.5
Amolops_granulosus	32.8333	106.25	836.1	2014	6	21.2933	119.4
Amolops_granulosus	32.8333	106.25	836.1	2015	6	21.0667	275.9
Amolops_granulosus	32.8333	106.25	836.1	2016	6	22.9367	64.1
Amolops_granulosus	32.8333	106.25	836.1	2012	7	23.1968	388.6
Amolops_granulosus	32.8333	106.25	836.1	2013	7	23.5129	410.6
Amolops_granulosus	32.8333	106.25	836.1	2014	7	24.0516	88.9
Amolops_granulosus	32.8333	106.25	836.1	2015	7	23.029	120.8
Amolops_granulosus	32.8333	106.25	836.1	2016	7	23.8161	172.3
Amolops_granulosus	32.8333	106.25	836.1	2012	8	23.171	197.4
Amolops_granulosus	32.8333	106.25	836.1	2013	8	24.3903	142.1
Amolops_granulosus	32.8333	106.25	836.1	2014	8	22.1452	151.5
Amolops_granulosus	32.8333	106.25	836.1	2015	8	22.0484	127.2
Amolops_granulosus	32.8333	106.25	836.1	2016	8	24.371	84.8
Amolops_granulosus	32.8333	106.25	836.1	2012	9	17.7267	120.6
Amolops_granulosus	32.8333	106.25	836.1	2013	9	18.54	136.6
Amolops_granulosus	32.8333	106.25	836.1	2014	9	18.5467	243.7
Amolops_granulosus	32.8333	106.25	836.1	2015	9	18.2667	225.2
Amolops_granulosus	32.8333	106.25	836.1	2016	9	19.2033	84.3
Amolops_granulosus	32.8333	106.25	836.1	2012	10	13.629	46.4
Amolops_granulosus	32.8333	106.25	836.1	2013	10	14.8871	38.6
Amolops_granulosus	32.8333	106.25	836.1	2014	10	14.4097	141.9
Amolops_granulosus	32.8333	106.25	836.1	2015	10	13.8097	64
Amolops_granulosus	32.8333	106.25	836.1	2016	10	13.4258	65.8
Amolops_granulosus	32.8333	106.25	836.1	2012	11	6.90667	29.6
Amolops_granulosus	32.8333	106.25	836.1	2013	11	7.71667	32.6
Amolops_granulosus	32.8333	106.25	836.1	2014	11	8.09667	41.2
Amolops_granulosus	32.8333	106.25	836.1	2015	11	9.01	53.4
Amolops_granulosus	32.8333	106.25	836.1	2016	11	7.97333	33.1
Amolops_granulosus	32.8333	106.25	836.1	2012	12	2.45484	9
Amolops_granulosus	32.8333	106.25	836.1	2013	12	2.64516	3.6
Amolops_granulosus	32.8333	106.25	836.1	2014	12	2.03548	4.5
Amolops_granulosus	32.8333	106.25	836.1	2015	12	3.43226	9.7
Amolops_granulosus	32.8333	106.25	836.1	2016	12	4.18065	5
Amolops_kangtingensis	30.05	101.967	2615.7	2012	1	-4.1	0.9
Amolops_kangtingensis	30.05	101.967	2615.7	2013	1	-1.60645	4.6
Amolops_kangtingensis	30.05	101.967	2615.7	2014	1	-0.532258	5.5
Amolops_kangtingensis	30.05	101.967	2615.7	2015	1	0.241935	1.4
Amolops_kangtingensis	30.05	101.967	2615.7	2016	1	-2.39032	14.6
Amolops_kangtingensis	30.05	101.967	2615.7	2012	2	-1.18621	15.7
Amolops_kangtingensis	30.05	101.967	2615.7	2013	2	3.09643	0.2
Amolops_kangtingensis	30.05	101.967	2615.7	2014	2	-0.0357143	7.1
Amolops_kangtingensis	30.05	101.967	2615.7	2015	2	1.89286	2.6
Amolops_kangtingensis	30.05	101.967	2615.7	2016	2	-0.613793	52.2
Amolops_kangtingensis	30.05	101.967	2615.7	2012	3	2.7	55.1
Amolops_kangtingensis	30.05	101.967	2615.7	2013	3	6.07419	46.8
Amolops_kangtingensis	30.05	101.967	2615.7	2014	3	3.95806	27.8
Amolops_kangtingensis	30.05	101.967	2615.7	2015	3	5.69355	18.5
Amolops_kangtingensis	30.05	101.967	2615.7	2016	3	5.27419	23.4
Amolops_kangtingensis	30.05	101.967	2615.7	2012	4	7.95	70.1
Amolops_kangtingensis	30.05	101.967	2615.7	2013	4	7.95	82.7
Amolops_kangtingensis	30.05	101.967	2615.7	2014	4	9.19667	50.3
Amolops_kangtingensis	30.05	101.967	2615.7	2015	4	8.72	60.1
Amolops_kangtingensis	30.05	101.967	2615.7	2016	4	8.53333	123.4
Amolops_kangtingensis	30.05	101.967	2615.7	2012	5	12.0032	83.5
Amolops_kangtingensis	30.05	101.967	2615.7	2013	5	10.9806	102.3
Amolops_kangtingensis	30.05	101.967	2615.7	2014	5	10.9968	61.5
Amolops_kangtingensis	30.05	101.967	2615.7	2015	5	12.2129	97.4
Amolops_kangtingensis	30.05	101.967	2615.7	2016	5	12.4742	78.1
Amolops_kangtingensis	30.05	101.967	2615.7	2012	6	15.6226	142.7
Amolops_kangtingensis	30.05	101.967	2615.7	2013	6	15.4567	165.5
Amolops_kangtingensis	30.05	101.967	2615.7	2014	6	13.2033	233.2
Amolops_kangtingensis	30.05	101.967	2615.7	2015	6	14.3767	191.6
Amolops_kangtingensis	30.05	101.967	2615.7	2016	6	15.27	169.8
Amolops_kangtingensis	30.05	101.967	2615.7	2012	7	15.6226	105.8
Amolops_kangtingensis	30.05	101.967	2615.7	2013	7	17.1806	81.4
Amolops_kangtingensis	30.05	101.967	2615.7	2014	7	16.0194	150.8
Amolops_kangtingensis	30.05	101.967	2615.7	2015	7	14.6516	169.1
Amolops_kangtingensis	30.05	101.967	2615.7	2016	7	16.5516	169.1
Amolops_kangtingensis	30.05	101.967	2615.7	2012	8	16.3032	76.6
Amolops_kangtingensis	30.05	101.967	2615.7	2013	8	17.3613	22.5
Amolops_kangtingensis	30.05	101.967	2615.7	2014	8	14.3419	184.4
Amolops_kangtingensis	30.05	101.967	2615.7	2015	8	14.3323	199.9
Amolops_kangtingensis	30.05	101.967	2615.7	2016	8	17.6065	46.1
Amolops_kangtingensis	30.05	101.967	2615.7	2012	9	11.7933	150.9
Amolops_kangtingensis	30.05	101.967	2615.7	2013	9	12.0233	249
Amolops_kangtingensis	30.05	101.967	2615.7	2014	9	13.5167	127.7
Amolops_kangtingensis	30.05	101.967	2615.7	2015	9	12.2167	210.5
Amolops_kangtingensis	30.05	101.967	2615.7	2016	9	11.9033	219.3
Amolops_kangtingensis	30.05	101.967	2615.7	2012	10	7.92581	55.4
Amolops_kangtingensis	30.05	101.967	2615.7	2013	10	7.58065	98.6
Amolops_kangtingensis	30.05	101.967	2615.7	2014	10	9.46774	8.4
Amolops_kangtingensis	30.05	101.967	2615.7	2015	10	9.60323	31.7
Amolops_kangtingensis	30.05	101.967	2615.7	2016	10	10.0387	28.6
Amolops_kangtingensis	30.05	101.967	2615.7	2012	11	3.44	2.1
Amolops_kangtingensis	30.05	101.967	2615.7	2013	11	4.13333	2.9
Amolops_kangtingensis	30.05	101.967	2615.7	2014	11	3.40667	23.2
Amolops_kangtingensis	30.05	101.967	2615.7	2015	11	6.21667	0
Amolops_kangtingensis	30.05	101.967	2615.7	2016	11	4.37667	11.5
Amolops_kangtingensis	30.05	101.967	2615.7	2012	12	-0.174194	0.1
Amolops_kangtingensis	30.05	101.967	2615.7	2013	12	-1.57742	5.7
Amolops_kangtingensis	30.05	101.967	2615.7	2014	12	-1.27097	0.8
Amolops_kangtingensis	30.05	101.967	2615.7	2015	12	-0.648387	10.5
Amolops_kangtingensis	30.05	101.967	2615.7	2016	12	1.43226	4.3
Amolops_lifanensis	32.65	103.567	2850.7	2012	1	-3.60323	8.3
Amolops_lifanensis	32.65	103.567	2850.7	2013	1	3.54516	8
Amolops_lifanensis	32.65	103.567	2850.7	2014	1	-3.48387	6.8
Amolops_lifanensis	32.65	103.567	2850.7	2015	1	-3.31935	7.2
Amolops_lifanensis	32.65	103.567	2850.7	2016	1	-4.83226	8.8
Amolops_lifanensis	32.65	103.567	2850.7	2012	2	-0.172414	12.9
Amolops_lifanensis	32.65	103.567	2850.7	2013	2	5.2	10.6
Amolops_lifanensis	32.65	103.567	2850.7	2014	2	-0.842857	14.4
Amolops_lifanensis	32.65	103.567	2850.7	2015	2	-0.228571	3.2
Amolops_lifanensis	32.65	103.567	2850.7	2016	2	-1.57586	19.3
Amolops_lifanensis	32.65	103.567	2850.7	2012	3	3.03871	25.9
Amolops_lifanensis	32.65	103.567	2850.7	2013	3	12.0484	22.7
Amolops_lifanensis	32.65	103.567	2850.7	2014	3	2.80645	36.8
Amolops_lifanensis	32.65	103.567	2850.7	2015	3	4.10968	32.1
Amolops_lifanensis	32.65	103.567	2850.7	2016	3	2.8871	38.8
Amolops_lifanensis	32.65	103.567	2850.7	2012	4	6.75	37.7
Amolops_lifanensis	32.65	103.567	2850.7	2013	4	16.89	66
Amolops_lifanensis	32.65	103.567	2850.7	2014	4	6.85333	67.3
Amolops_lifanensis	32.65	103.567	2850.7	2015	4	6.30333	90.3
Amolops_lifanensis	32.65	103.567	2850.7	2016	4	6.76	70.7
Amolops_lifanensis	32.65	103.567	2850.7	2012	5	11.329	135.2
Amolops_lifanensis	32.65	103.567	2850.7	2013	5	21.7387	187.5
Amolops_lifanensis	32.65	103.567	2850.7	2014	5	9.65484	126.7
Amolops_lifanensis	32.65	103.567	2850.7	2015	5	9.72903	140.7
Amolops_lifanensis	32.65	103.567	2850.7	2016	5	10.1871	95.8
Amolops_lifanensis	32.65	103.567	2850.7	2012	6	15.5935	111.6
Amolops_lifanensis	32.65	103.567	2850.7	2013	6	25.28	80.4
Amolops_lifanensis	32.65	103.567	2850.7	2014	6	12.3867	111.2
Amolops_lifanensis	32.65	103.567	2850.7	2015	6	13.2033	181.1
Amolops_lifanensis	32.65	103.567	2850.7	2016	6	12.3967	124.6
Amolops_lifanensis	32.65	103.567	2850.7	2012	7	15.5935	155.3
Amolops_lifanensis	32.65	103.567	2850.7	2013	7	29.3903	66.8
Amolops_lifanensis	32.65	103.567	2850.7	2014	7	14.7387	128.2
Amolops_lifanensis	32.65	103.567	2850.7	2015	7	12.0581	76.8
Amolops_lifanensis	32.65	103.567	2850.7	2016	7	14.7742	86.2
Amolops_lifanensis	32.65	103.567	2850.7	2012	8	15.3677	98.8
Amolops_lifanensis	32.65	103.567	2850.7	2013	8	28.4097	52.7
Amolops_lifanensis	32.65	103.567	2850.7	2014	8	13.529	99.9
Amolops_lifanensis	32.65	103.567	2850.7	2015	8	12.329	134.1
Amolops_lifanensis	32.65	103.567	2850.7	2016	8	16.0355	58.2
Amolops_lifanensis	32.65	103.567	2850.7	2012	9	11.4933	89.8
Amolops_lifanensis	32.65	103.567	2850.7	2013	9	21.93	74.2
Amolops_lifanensis	32.65	103.567	2850.7	2014	9	12.18	157.3
Amolops_lifanensis	32.65	103.567	2850.7	2015	9	11.7333	89.6
Amolops_lifanensis	32.65	103.567	2850.7	2016	9	10.8033	89
Amolops_lifanensis	32.65	103.567	2850.7	2012	10	7.1129	86.9
Amolops_lifanensis	32.65	103.567	2850.7	2013	10	16.8645	53.1
Amolops_lifanensis	32.65	103.567	2850.7	2014	10	6.70645	61.8
Amolops_lifanensis	32.65	103.567	2850.7	2015	10	7.57097	66.2
Amolops_lifanensis	32.65	103.567	2850.7	2016	10	7.80645	75.6
Amolops_lifanensis	32.65	103.567	2850.7	2012	11	1.01333	17.2
Amolops_lifanensis	32.65	103.567	2850.7	2013	11	10.5533	26.5
Amolops_lifanensis	32.65	103.567	2850.7	2014	11	1.76333	20.3
Amolops_lifanensis	32.65	103.567	2850.7	2015	11	3.49	3
Amolops_lifanensis	32.65	103.567	2850.7	2016	11	2.37333	9.2
Amolops_lifanensis	32.65	103.567	2850.7	2012	12	-2.34194	3
Amolops_lifanensis	32.65	103.567	2850.7	2013	12	5.24839	0
Amolops_lifanensis	32.65	103.567	2850.7	2014	12	-3.14839	2.7
Amolops_lifanensis	32.65	103.567	2850.7	2015	12	-3.57742	5.1
Amolops_lifanensis	32.65	103.567	2850.7	2016	12	-1.45161	1.3
Amolops_loloensis	28.65	102.517	1659.5	2012	1	2.37742	2.8
Amolops_loloensis	28.65	102.517	1659.5	2013	1	4.27742	0
Amolops_loloensis	28.65	102.517	1659.5	2014	1	4.24516	1.7
Amolops_loloensis	28.65	102.517	1659.5	2015	1	5.83548	5.4
Amolops_loloensis	28.65	102.517	1659.5	2016	1	4.02903	9.5
Amolops_loloensis	28.65	102.517	1659.5	2012	2	4.78621	0.3
Amolops_loloensis	28.65	102.517	1659.5	2013	2	9.09286	0
Amolops_loloensis	28.65	102.517	1659.5	2014	2	5.63571	3.4
Amolops_loloensis	28.65	102.517	1659.5	2015	2	7.71786	6.3
Amolops_loloensis	28.65	102.517	1659.5	2016	2	5.16207	6
Amolops_loloensis	28.65	102.517	1659.5	2012	3	8.99032	25.5
Amolops_loloensis	28.65	102.517	1659.5	2013	3	12.7419	60.7
Amolops_loloensis	28.65	102.517	1659.5	2014	3	10.3452	21.4
Amolops_loloensis	28.65	102.517	1659.5	2015	3	12.2323	11.8
Amolops_loloensis	28.65	102.517	1659.5	2016	3	10.9419	31.4
Amolops_loloensis	28.65	102.517	1659.5	2012	4	14.25	21.3
Amolops_loloensis	28.65	102.517	1659.5	2013	4	14.19	49.1
Amolops_loloensis	28.65	102.517	1659.5	2014	4	15.39	41.7
Amolops_loloensis	28.65	102.517	1659.5	2015	4	14.49	43.3
Amolops_loloensis	28.65	102.517	1659.5	2016	4	14.4033	114.9
Amolops_loloensis	28.65	102.517	1659.5	2012	5	18.5742	53.8
Amolops_loloensis	28.65	102.517	1659.5	2013	5	17.0129	133.9
Amolops_loloensis	28.65	102.517	1659.5	2014	5	17.1452	112.9
Amolops_loloensis	28.65	102.517	1659.5	2015	5	18.1516	128.8
Amolops_loloensis	28.65	102.517	1659.5	2016	5	17.9129	128.1
Amolops_loloensis	28.65	102.517	1659.5	2012	6	21.4355	208
Amolops_loloensis	28.65	102.517	1659.5	2013	6	21.1867	235.5
Amolops_loloensis	28.65	102.517	1659.5	2014	6	18.9	149.3
Amolops_loloensis	28.65	102.517	1659.5	2015	6	20.25	299.9
Amolops_loloensis	28.65	102.517	1659.5	2016	6	20.4467	246.6
Amolops_loloensis	28.65	102.517	1659.5	2012	7	21.4355	289.7
Amolops_loloensis	28.65	102.517	1659.5	2013	7	22.6129	189.9
Amolops_loloensis	28.65	102.517	1659.5	2014	7	21.3677	173.1
Amolops_loloensis	28.65	102.517	1659.5	2015	7	20.1613	195.1
Amolops_loloensis	28.65	102.517	1659.5	2016	7	21.9	231.3
Amolops_loloensis	28.65	102.517	1659.5	2012	8	21.3065	143.8
Amolops_loloensis	28.65	102.517	1659.5	2013	8	21.7774	106.2
Amolops_loloensis	28.65	102.517	1659.5	2014	8	19.8387	327.8
Amolops_loloensis	28.65	102.517	1659.5	2015	8	20.1806	211.7
Amolops_loloensis	28.65	102.517	1659.5	2016	8	22.0935	149.4
Amolops_loloensis	28.65	102.517	1659.5	2012	9	17.06	138.8
Amolops_loloensis	28.65	102.517	1659.5	2013	9	17.62	136.4
Amolops_loloensis	28.65	102.517	1659.5	2014	9	19.3267	192
Amolops_loloensis	28.65	102.517	1659.5	2015	9	17.43	243.5
Amolops_loloensis	28.65	102.517	1659.5	2016	9	17.3867	185.7
Amolops_loloensis	28.65	102.517	1659.5	2012	10	13.5194	68.5
Amolops_loloensis	28.65	102.517	1659.5	2013	10	13.1419	97.2
Amolops_loloensis	28.65	102.517	1659.5	2014	10	15.271	134.5
Amolops_loloensis	28.65	102.517	1659.5	2015	10	15.0645	60.6
Amolops_loloensis	28.65	102.517	1659.5	2016	10	15.5968	87.3
Amolops_loloensis	28.65	102.517	1659.5	2012	11	9.5	0.5
Amolops_loloensis	28.65	102.517	1659.5	2013	11	10.2333	9.2
Amolops_loloensis	28.65	102.517	1659.5	2014	11	9.56	12.2
Amolops_loloensis	28.65	102.517	1659.5	2015	11	11.9967	0.4
Amolops_loloensis	28.65	102.517	1659.5	2016	11	9.62667	52.1
Amolops_loloensis	28.65	102.517	1659.5	2012	12	5.88387	0
Amolops_loloensis	28.65	102.517	1659.5	2013	12	3.89355	3.7
Amolops_loloensis	28.65	102.517	1659.5	2014	12	4.53871	0.3
Amolops_loloensis	28.65	102.517	1659.5	2015	12	5.69032	8.3
Amolops_loloensis	28.65	102.517	1659.5	2016	12	6.9129	1.3
Amolops_mantzorum	30.75	103.867	547.7	2012	1	5.03871	13.6
Amolops_mantzorum	30.75	103.867	547.7	2013	1	5.32581	1.2
Amolops_mantzorum	30.75	103.867	547.7	2014	1	6.04194	1.1
Amolops_mantzorum	30.75	103.867	547.7	2015	1	6.82258	3.1
Amolops_mantzorum	30.75	103.867	547.7	2016	1	5.66452	11.4
Amolops_mantzorum	30.75	103.867	547.7	2012	2	6.04483	6.3
Amolops_mantzorum	30.75	103.867	547.7	2013	2	9.34286	4.7
Amolops_mantzorum	30.75	103.867	547.7	2014	2	6.72143	8.7
Amolops_mantzorum	30.75	103.867	547.7	2015	2	8.63214	2.8
Amolops_mantzorum	30.75	103.867	547.7	2016	2	7.33793	25
Amolops_mantzorum	30.75	103.867	547.7	2012	3	11.2161	26.2
Amolops_mantzorum	30.75	103.867	547.7	2013	3	15.6677	7.6
Amolops_mantzorum	30.75	103.867	547.7	2014	3	11.8645	13
Amolops_mantzorum	30.75	103.867	547.7	2015	3	13.2645	8.1
Amolops_mantzorum	30.75	103.867	547.7	2016	3	13.1452	33.9
Amolops_mantzorum	30.75	103.867	547.7	2012	4	17.6733	17.6
Amolops_mantzorum	30.75	103.867	547.7	2013	4	17.7033	42.2
Amolops_mantzorum	30.75	103.867	547.7	2014	4	17.8533	46.2
Amolops_mantzorum	30.75	103.867	547.7	2015	4	17.5867	87.4
Amolops_mantzorum	30.75	103.867	547.7	2016	4	17.63	59.2
Amolops_mantzorum	30.75	103.867	547.7	2012	5	21.1806	118.8
Amolops_mantzorum	30.75	103.867	547.7	2013	5	21.1774	99
Amolops_mantzorum	30.75	103.867	547.7	2014	5	20.4355	51.9
Amolops_mantzorum	30.75	103.867	547.7	2015	5	21.9581	51.8
Amolops_mantzorum	30.75	103.867	547.7	2016	5	20.7516	89.3
Amolops_mantzorum	30.75	103.867	547.7	2012	6	22.4867	74.9
Amolops_mantzorum	30.75	103.867	547.7	2013	6	24.5367	182.1
Amolops_mantzorum	30.75	103.867	547.7	2014	6	22.8933	132.2
Amolops_mantzorum	30.75	103.867	547.7	2015	6	23.8733	90.8
Amolops_mantzorum	30.75	103.867	547.7	2016	6	24.6567	80.3
Amolops_mantzorum	30.75	103.867	547.7	2012	7	24.8387	143.1
Amolops_mantzorum	30.75	103.867	547.7	2013	7	25.8032	525.5
Amolops_mantzorum	30.75	103.867	547.7	2014	7	25.329	389.5
Amolops_mantzorum	30.75	103.867	547.7	2015	7	25.1	92.2
Amolops_mantzorum	30.75	103.867	547.7	2016	7	25.9226	349.9
Amolops_mantzorum	30.75	103.867	547.7	2012	8	25.9935	64.1
Amolops_mantzorum	30.75	103.867	547.7	2013	8	26.4935	228.3
Amolops_mantzorum	30.75	103.867	547.7	2014	8	24.0452	180.8
Amolops_mantzorum	30.75	103.867	547.7	2015	8	23.8516	291.9
Amolops_mantzorum	30.75	103.867	547.7	2016	8	26.5032	173
Amolops_mantzorum	30.75	103.867	547.7	2012	9	20.8867	76.7
Amolops_mantzorum	30.75	103.867	547.7	2013	9	20.77	196.2
Amolops_mantzorum	30.75	103.867	547.7	2014	9	21.5967	51.6
Amolops_mantzorum	30.75	103.867	547.7	2015	9	21.0967	205.7
Amolops_mantzorum	30.75	103.867	547.7	2016	9	21.5133	126.3
Amolops_mantzorum	30.75	103.867	547.7	2012	10	17.2	57
Amolops_mantzorum	30.75	103.867	547.7	2013	10	17.6323	27.1
Amolops_mantzorum	30.75	103.867	547.7	2014	10	17.6742	77.8
Amolops_mantzorum	30.75	103.867	547.7	2015	10	18.2452	23
Amolops_mantzorum	30.75	103.867	547.7	2016	10	17.8806	13.6
Amolops_mantzorum	30.75	103.867	547.7	2012	11	11.0033	9.7
Amolops_mantzorum	30.75	103.867	547.7	2013	11	12.02	21.8
Amolops_mantzorum	30.75	103.867	547.7	2014	11	11.7567	16.5
Amolops_mantzorum	30.75	103.867	547.7	2015	11	13.5133	9.8
Amolops_mantzorum	30.75	103.867	547.7	2016	11	11.9167	20.7
Amolops_mantzorum	30.75	103.867	547.7	2012	12	6.75484	2.9
Amolops_mantzorum	30.75	103.867	547.7	2013	12	6.0129	7.6
Amolops_mantzorum	30.75	103.867	547.7	2014	12	5.82581	5.7
Amolops_mantzorum	30.75	103.867	547.7	2015	12	7.35806	13.6
Amolops_mantzorum	30.75	103.867	547.7	2016	12	8.49032	1.3
Amolops_ricketti	28.3333	106.217	1180.2	2012	1	1.41935	25.2
Amolops_ricketti	28.3333	106.217	1180.2	2013	1	3.45484	8
Amolops_ricketti	28.3333	106.217	1180.2	2014	1	4.9	11.6
Amolops_ricketti	28.3333	106.217	1180.2	2015	1	5.13871	21.1
Amolops_ricketti	28.3333	106.217	1180.2	2016	1	3.26129	40
Amolops_ricketti	28.3333	106.217	1180.2	2012	2	2.75172	18.1
Amolops_ricketti	28.3333	106.217	1180.2	2013	2	7.20357	24.1
Amolops_ricketti	28.3333	106.217	1180.2	2014	2	3.85	32.4
Amolops_ricketti	28.3333	106.217	1180.2	2015	2	7.22857	18
Amolops_ricketti	28.3333	106.217	1180.2	2016	2	4.63793	20.8
Amolops_ricketti	28.3333	106.217	1180.2	2012	3	8.64194	27.6
Amolops_ricketti	28.3333	106.217	1180.2	2013	3	13.0871	60.9
Amolops_ricketti	28.3333	106.217	1180.2	2014	3	9.65806	117.5
Amolops_ricketti	28.3333	106.217	1180.2	2015	3	11.0258	41.7
Amolops_ricketti	28.3333	106.217	1180.2	2016	3	10.8129	101.5
Amolops_ricketti	28.3333	106.217	1180.2	2012	4	15.2467	87.1
Amolops_ricketti	28.3333	106.217	1180.2	2013	4	14.6933	91.8
Amolops_ricketti	28.3333	106.217	1180.2	2014	4	14.94	70.5
Amolops_ricketti	28.3333	106.217	1180.2	2015	4	15.4033	87.9
Amolops_ricketti	28.3333	106.217	1180.2	2016	4	14.76	138.3
Amolops_ricketti	28.3333	106.217	1180.2	2012	5	18.2645	150.7
Amolops_ricketti	28.3333	106.217	1180.2	2013	5	18.3742	114.8
Amolops_ricketti	28.3333	106.217	1180.2	2014	5	16.5613	113.7
Amolops_ricketti	28.3333	106.217	1180.2	2015	5	18.1419	134.6
Amolops_ricketti	28.3333	106.217	1180.2	2016	5	18.329	188.6
Amolops_ricketti	28.3333	106.217	1180.2	2012	6	23.3032	128.7
Amolops_ricketti	28.3333	106.217	1180.2	2013	6	22.81	348.4
Amolops_ricketti	28.3333	106.217	1180.2	2014	6	19.5467	194
Amolops_ricketti	28.3333	106.217	1180.2	2015	6	21.47	171.8
Amolops_ricketti	28.3333	106.217	1180.2	2016	6	21.6333	186.3
Amolops_ricketti	28.3333	106.217	1180.2	2012	7	23.3032	205.8
Amolops_ricketti	28.3333	106.217	1180.2	2013	7	25.8742	36.4
Amolops_ricketti	28.3333	106.217	1180.2	2014	7	23.0484	188.8
Amolops_ricketti	28.3333	106.217	1180.2	2015	7	21.9032	217.2
Amolops_ricketti	28.3333	106.217	1180.2	2016	7	24.7774	82.2
Amolops_ricketti	28.3333	106.217	1180.2	2012	8	23.1484	58.7
Amolops_ricketti	28.3333	106.217	1180.2	2013	8	24.1323	116.8
Amolops_ricketti	28.3333	106.217	1180.2	2014	8	22.0839	234.9
Amolops_ricketti	28.3333	106.217	1180.2	2015	8	21.5	167.3
Amolops_ricketti	28.3333	106.217	1180.2	2016	8	23.2258	178.1
Amolops_ricketti	28.3333	106.217	1180.2	2012	9	18.4467	105.4
Amolops_ricketti	28.3333	106.217	1180.2	2013	9	18.8533	115.8
Amolops_ricketti	28.3333	106.217	1180.2	2014	9	20.5233	109.1
Amolops_ricketti	28.3333	106.217	1180.2	2015	9	19.0267	102.1
Amolops_ricketti	28.3333	106.217	1180.2	2016	9	18.76	121.8
Amolops_ricketti	28.3333	106.217	1180.2	2012	10	14.371	58.2
Amolops_ricketti	28.3333	106.217	1180.2	2013	10	14.3161	90.6
Amolops_ricketti	28.3333	106.217	1180.2	2014	10	15.7645	112.8
Amolops_ricketti	28.3333	106.217	1180.2	2015	10	15.8581	112.7
Amolops_ricketti	28.3333	106.217	1180.2	2016	10	15.7065	73
Amolops_ricketti	28.3333	106.217	1180.2	2012	11	8.64333	32.7
Amolops_ricketti	28.3333	106.217	1180.2	2013	11	10.3533	36.1
Amolops_ricketti	28.3333	106.217	1180.2	2014	11	9.16333	46.2
Amolops_ricketti	28.3333	106.217	1180.2	2015	11	11.8833	16.5
Amolops_ricketti	28.3333	106.217	1180.2	2016	11	9.82667	47.8
Amolops_ricketti	28.3333	106.217	1180.2	2012	12	4.36774	22
Amolops_ricketti	28.3333	106.217	1180.2	2013	12	4.19355	18.7
Amolops_ricketti	28.3333	106.217	1180.2	2014	12	4.02903	25.7
Amolops_ricketti	28.3333	106.217	1180.2	2015	12	4.88065	31.1
Amolops_ricketti	28.3333	106.217	1180.2	2016	12	6.59355	15.5
Amolops_sinensis	28.3333	106.217	1180.2	2012	1	1.41935	25.2
Amolops_sinensis	28.3333	106.217	1180.2	2013	1	3.45484	8
Amolops_sinensis	28.3333	106.217	1180.2	2014	1	4.9	11.6
Amolops_sinensis	28.3333	106.217	1180.2	2015	1	5.13871	21.1
Amolops_sinensis	28.3333	106.217	1180.2	2016	1	3.26129	40
Amolops_sinensis	28.3333	106.217	1180.2	2012	2	2.75172	18.1
Amolops_sinensis	28.3333	106.217	1180.2	2013	2	7.20357	24.1
Amolops_sinensis	28.3333	106.217	1180.2	2014	2	3.85	32.4
Amolops_sinensis	28.3333	106.217	1180.2	2015	2	7.22857	18
Amolops_sinensis	28.3333	106.217	1180.2	2016	2	4.63793	20.8
Amolops_sinensis	28.3333	106.217	1180.2	2012	3	8.64194	27.6
Amolops_sinensis	28.3333	106.217	1180.2	2013	3	13.0871	60.9
Amolops_sinensis	28.3333	106.217	1180.2	2014	3	9.65806	117.5
Amolops_sinensis	28.3333	106.217	1180.2	2015	3	11.0258	41.7
Amolops_sinensis	28.3333	106.217	1180.2	2016	3	10.8129	101.5
Amolops_sinensis	28.3333	106.217	1180.2	2012	4	15.2467	87.1
Amolops_sinensis	28.3333	106.217	1180.2	2013	4	14.6933	91.8
Amolops_sinensis	28.3333	106.217	1180.2	2014	4	14.94	70.5
Amolops_sinensis	28.3333	106.217	1180.2	2015	4	15.4033	87.9
Amolops_sinensis	28.3333	106.217	1180.2	2016	4	14.76	138.3
Amolops_sinensis	28.3333	106.217	1180.2	2012	5	18.2645	150.7
Amolops_sinensis	28.3333	106.217	1180.2	2013	5	18.3742	114.8
Amolops_sinensis	28.3333	106.217	1180.2	2014	5	16.5613	113.7
Amolops_sinensis	28.3333	106.217	1180.2	2015	5	18.1419	134.6
Amolops_sinensis	28.3333	106.217	1180.2	2016	5	18.329	188.6
Amolops_sinensis	28.3333	106.217	1180.2	2012	6	23.3032	128.7
Amolops_sinensis	28.3333	106.217	1180.2	2013	6	22.81	348.4
Amolops_sinensis	28.3333	106.217	1180.2	2014	6	19.5467	194
Amolops_sinensis	28.3333	106.217	1180.2	2015	6	21.47	171.8
Amolops_sinensis	28.3333	106.217	1180.2	2016	6	21.6333	186.3
Amolops_sinensis	28.3333	106.217	1180.2	2012	7	23.3032	205.8
Amolops_sinensis	28.3333	106.217	1180.2	2013	7	25.8742	36.4
Amolops_sinensis	28.3333	106.217	1180.2	2014	7	23.0484	188.8
Amolops_sinensis	28.3333	106.217	1180.2	2015	7	21.9032	217.2
Amolops_sinensis	28.3333	106.217	1180.2	2016	7	24.7774	82.2
Amolops_sinensis	28.3333	106.217	1180.2	2012	8	23.1484	58.7
Amolops_sinensis	28.3333	106.217	1180.2	2013	8	24.1323	116.8
Amolops_sinensis	28.3333	106.217	1180.2	2014	8	22.0839	234.9
Amolops_sinensis	28.3333	106.217	1180.2	2015	8	21.5	167.3
Amolops_sinensis	28.3333	106.217	1180.2	2016	8	23.2258	178.1
Amolops_sinensis	28.3333	106.217	1180.2	2012	9	18.4467	105.4
Amolops_sinensis	28.3333	106.217	1180.2	2013	9	18.8533	115.8
Amolops_sinensis	28.3333	106.217	1180.2	2014	9	20.5233	109.1
Amolops_sinensis	28.3333	106.217	1180.2	2015	9	19.0267	102.1
Amolops_sinensis	28.3333	106.217	1180.2	2016	9	18.76	121.8
Amolops_sinensis	28.3333	106.217	1180.2	2012	10	14.371	58.2
Amolops_sinensis	28.3333	106.217	1180.2	2013	10	14.3161	90.6
Amolops_sinensis	28.3333	106.217	1180.2	2014	10	15.7645	112.8
Amolops_sinensis	28.3333	106.217	1180.2	2015	10	15.8581	112.7
Amolops_sinensis	28.3333	106.217	1180.2	2016	10	15.7065	73
Amolops_sinensis	28.3333	106.217	1180.2	2012	11	8.64333	32.7
Amolops_sinensis	28.3333	106.217	1180.2	2013	11	10.3533	36.1
Amolops_sinensis	28.3333	106.217	1180.2	2014	11	9.16333	46.2
Amolops_sinensis	28.3333	106.217	1180.2	2015	11	11.8833	16.5
Amolops_sinensis	28.3333	106.217	1180.2	2016	11	9.82667	47.8
Amolops_sinensis	28.3333	106.217	1180.2	2012	12	4.36774	22
Amolops_sinensis	28.3333	106.217	1180.2	2013	12	4.19355	18.7
Amolops_sinensis	28.3333	106.217	1180.2	2014	12	4.02903	25.7
Amolops_sinensis	28.3333	106.217	1180.2	2015	12	4.88065	31.1
Amolops_sinensis	28.3333	106.217	1180.2	2016	12	6.59355	15.5
Amolops_torrentis	19.0333	109.833	250.9	2012	1	16.9806	36.1
Amolops_torrentis	19.0333	109.833	250.9	2013	1	18.0677	28.5
Amolops_torrentis	19.0333	109.833	250.9	2014	1	16.7516	2.2
Amolops_torrentis	19.0333	109.833	250.9	2015	1	16.9452	24.4
Amolops_torrentis	19.0333	109.833	250.9	2016	1	18.5903	103.3
Amolops_torrentis	19.0333	109.833	250.9	2012	2	19.2655	27.1
Amolops_torrentis	19.0333	109.833	250.9	2013	2	21.3357	34.5
Amolops_torrentis	19.0333	109.833	250.9	2014	2	17.8429	13.4
Amolops_torrentis	19.0333	109.833	250.9	2015	2	19.9714	11.2
Amolops_torrentis	19.0333	109.833	250.9	2016	2	16.2862	19.1
Amolops_torrentis	19.0333	109.833	250.9	2012	3	22.1871	18.2
Amolops_torrentis	19.0333	109.833	250.9	2013	3	22.9871	78.2
Amolops_torrentis	19.0333	109.833	250.9	2014	3	22.6387	29.5
Amolops_torrentis	19.0333	109.833	250.9	2015	3	23.1774	37.1
Amolops_torrentis	19.0333	109.833	250.9	2016	3	21.3065	23.3
Amolops_torrentis	19.0333	109.833	250.9	2012	4	26.2767	203.5
Amolops_torrentis	19.0333	109.833	250.9	2013	4	24.8033	63.4
Amolops_torrentis	19.0333	109.833	250.9	2014	4	25.4367	158.9
Amolops_torrentis	19.0333	109.833	250.9	2015	4	24.1633	136.7
Amolops_torrentis	19.0333	109.833	250.9	2016	4	26.58	35.5
Amolops_torrentis	19.0333	109.833	250.9	2012	5	27.2484	341.5
Amolops_torrentis	19.0333	109.833	250.9	2013	5	27.2839	189.6
Amolops_torrentis	19.0333	109.833	250.9	2014	5	28.0871	230.3
Amolops_torrentis	19.0333	109.833	250.9	2015	5	28.5516	75.5
Amolops_torrentis	19.0333	109.833	250.9	2016	5	27.4742	162.2
Amolops_torrentis	19.0333	109.833	250.9	2012	6	27.61	334.3
Amolops_torrentis	19.0333	109.833	250.9	2013	6	27.21	118.5
Amolops_torrentis	19.0333	109.833	250.9	2014	6	28.22	257.6
Amolops_torrentis	19.0333	109.833	250.9	2015	6	28.5467	167.7
Amolops_torrentis	19.0333	109.833	250.9	2016	6	28.1933	57.6
Amolops_torrentis	19.0333	109.833	250.9	2012	7	27.1581	141.2
Amolops_torrentis	19.0333	109.833	250.9	2013	7	26.6	275.5
Amolops_torrentis	19.0333	109.833	250.9	2014	7	27.3935	393.8
Amolops_torrentis	19.0333	109.833	250.9	2015	7	27.1645	149
Amolops_torrentis	19.0333	109.833	250.9	2016	7	28.1548	162.1
Amolops_torrentis	19.0333	109.833	250.9	2012	8	26.7548	199.9
Amolops_torrentis	19.0333	109.833	250.9	2013	8	26.871	298.7
Amolops_torrentis	19.0333	109.833	250.9	2014	8	27.1452	220.8
Amolops_torrentis	19.0333	109.833	250.9	2015	8	27.7419	44
Amolops_torrentis	19.0333	109.833	250.9	2016	8	27.1742	527.2
Amolops_torrentis	19.0333	109.833	250.9	2012	9	25.9167	157.8
Amolops_torrentis	19.0333	109.833	250.9	2013	9	25.4233	546.9
Amolops_torrentis	19.0333	109.833	250.9	2014	9	26.5367	301.7
Amolops_torrentis	19.0333	109.833	250.9	2015	9	27.11	281.4
Amolops_torrentis	19.0333	109.833	250.9	2016	9	26.5	313.5
Amolops_torrentis	19.0333	109.833	250.9	2012	10	24.2065	319.1
Amolops_torrentis	19.0333	109.833	250.9	2013	10	23.4645	387.2
Amolops_torrentis	19.0333	109.833	250.9	2014	10	24.2613	431.1
Amolops_torrentis	19.0333	109.833	250.9	2015	10	24.0613	205.2
Amolops_torrentis	19.0333	109.833	250.9	2016	10	25.1387	898.5
Amolops_torrentis	19.0333	109.833	250.9	2012	11	23.0767	171.2
Amolops_torrentis	19.0333	109.833	250.9	2013	11	21.5433	483
Amolops_torrentis	19.0333	109.833	250.9	2014	11	22.8133	77.6
Amolops_torrentis	19.0333	109.833	250.9	2015	11	23.6567	214.8
Amolops_torrentis	19.0333	109.833	250.9	2016	11	21.9533	151
Amolops_torrentis	19.0333	109.833	250.9	2012	12	19.9839	132.1
Amolops_torrentis	19.0333	109.833	250.9	2013	12	15.8226	95.4
Amolops_torrentis	19.0333	109.833	250.9	2014	12	17.0258	111.2
Amolops_torrentis	19.0333	109.833	250.9	2015	12	19.5871	65
Amolops_torrentis	19.0333	109.833	250.9	2016	12	19.3742	51.6
Amolops_yunkaiensis	22.7	111.6	60	2012	1	11.4032	73.9
Amolops_yunkaiensis	22.7	111.6	60	2013	1	13.8161	5.3
Amolops_yunkaiensis	22.7	111.6	60	2014	1	13.4742	0
Amolops_yunkaiensis	22.7	111.6	60	2015	1	14.3806	83.1
Amolops_yunkaiensis	22.7	111.6	60	2016	1	13.7645	322
Amolops_yunkaiensis	22.7	111.6	60	2012	2	14.2448	37.6
Amolops_yunkaiensis	22.7	111.6	60	2013	2	17.8714	15.6
Amolops_yunkaiensis	22.7	111.6	60	2014	2	13.8071	25
Amolops_yunkaiensis	22.7	111.6	60	2015	2	17.4929	15.1
Amolops_yunkaiensis	22.7	111.6	60	2016	2	12.9172	41.5
Amolops_yunkaiensis	22.7	111.6	60	2012	3	18.8032	55.2
Amolops_yunkaiensis	22.7	111.6	60	2013	3	21.1097	189.8
Amolops_yunkaiensis	22.7	111.6	60	2014	3	18.4097	107.4
Amolops_yunkaiensis	22.7	111.6	60	2015	3	20.0194	20.6
Amolops_yunkaiensis	22.7	111.6	60	2016	3	18.0355	64.9
Amolops_yunkaiensis	22.7	111.6	60	2012	4	24.45	217.3
Amolops_yunkaiensis	22.7	111.6	60	2013	4	22.22	139.3
Amolops_yunkaiensis	22.7	111.6	60	2014	4	23.9033	165.8
Amolops_yunkaiensis	22.7	111.6	60	2015	4	23.5333	54.4
Amolops_yunkaiensis	22.7	111.6	60	2016	4	24.8233	89.3
Amolops_yunkaiensis	22.7	111.6	60	2012	5	27.4419	144.4
Amolops_yunkaiensis	22.7	111.6	60	2013	5	26.1387	161.7
Amolops_yunkaiensis	22.7	111.6	60	2014	5	25.8484	305.1
Amolops_yunkaiensis	22.7	111.6	60	2015	5	27.3742	343.8
Amolops_yunkaiensis	22.7	111.6	60	2016	5	27.1258	131.9
Amolops_yunkaiensis	22.7	111.6	60	2012	6	28.3548	257.9
Amolops_yunkaiensis	22.7	111.6	60	2013	6	27.9067	153.6
Amolops_yunkaiensis	22.7	111.6	60	2014	6	28.8467	222.2
Amolops_yunkaiensis	22.7	111.6	60	2015	6	28.6967	211.1
Amolops_yunkaiensis	22.7	111.6	60	2016	6	28.8733	157.8
Amolops_yunkaiensis	22.7	111.6	60	2012	7	28.3548	226.3
Amolops_yunkaiensis	22.7	111.6	60	2013	7	27.729	143.5
Amolops_yunkaiensis	22.7	111.6	60	2014	7	28.6935	173
Amolops_yunkaiensis	22.7	111.6	60	2015	7	28.4323	150.6
Amolops_yunkaiensis	22.7	111.6	60	2016	7	29.5742	97.1
Amolops_yunkaiensis	22.7	111.6	60	2012	8	28.5387	103.1
Amolops_yunkaiensis	22.7	111.6	60	2013	8	28.171	231.6
Amolops_yunkaiensis	22.7	111.6	60	2014	8	27.9839	116.6
Amolops_yunkaiensis	22.7	111.6	60	2015	8	29.0581	184.6
Amolops_yunkaiensis	22.7	111.6	60	2016	8	28.4516	252
Amolops_yunkaiensis	22.7	111.6	60	2012	9	26.4733	55.2
Amolops_yunkaiensis	22.7	111.6	60	2013	9	26.86	160.9
Amolops_yunkaiensis	22.7	111.6	60	2014	9	27.8233	101.9
Amolops_yunkaiensis	22.7	111.6	60	2015	9	27.5067	76
Amolops_yunkaiensis	22.7	111.6	60	2016	9	27.6367	92.4
Amolops_yunkaiensis	22.7	111.6	60	2012	10	24.1968	106.7
Amolops_yunkaiensis	22.7	111.6	60	2013	10	23.4065	3.6
Amolops_yunkaiensis	22.7	111.6	60	2014	10	24.6484	4.3
Amolops_yunkaiensis	22.7	111.6	60	2015	10	24.3032	187.3
Amolops_yunkaiensis	22.7	111.6	60	2016	10	25.6097	84.6
Amolops_yunkaiensis	22.7	111.6	60	2012	11	19.9067	175.4
Amolops_yunkaiensis	22.7	111.6	60	2013	11	19.52	129.4
Amolops_yunkaiensis	22.7	111.6	60	2014	11	20.8133	32.8
Amolops_yunkaiensis	22.7	111.6	60	2015	11	21.73	65.4
Amolops_yunkaiensis	22.7	111.6	60	2016	11	19.7367	142.2
Amolops_yunkaiensis	22.7	111.6	60	2012	12	15.3065	90.8
Amolops_yunkaiensis	22.7	111.6	60	2013	12	11.8452	200.9
Amolops_yunkaiensis	22.7	111.6	60	2014	12	12.871	61.7
Amolops_yunkaiensis	22.7	111.6	60	2015	12	15.1032	132.3
Amolops_yunkaiensis	22.7	111.6	60	2016	12	17.0419	0
Aquixalus_palpebralis	22.9833	103.683	1414.1	2012	1	8.57097	66.8
Aquixalus_palpebralis	22.9833	103.683	1414.1	2013	1	8.69677	31.3
Aquixalus_palpebralis	22.9833	103.683	1414.1	2014	1	8.99677	14
Aquixalus_palpebralis	22.9833	103.683	1414.1	2015	1	9.72258	73.7
Aquixalus_palpebralis	22.9833	103.683	1414.1	2016	1	9.97742	44.8
Aquixalus_palpebralis	22.9833	103.683	1414.1	2012	2	11.2931	5.1
Aquixalus_palpebralis	22.9833	103.683	1414.1	2013	2	13.8536	29
Aquixalus_palpebralis	22.9833	103.683	1414.1	2014	2	10.95	29.9
Aquixalus_palpebralis	22.9833	103.683	1414.1	2015	2	11.9214	41.6
Aquixalus_palpebralis	22.9833	103.683	1414.1	2016	2	9.08621	35.5
Aquixalus_palpebralis	22.9833	103.683	1414.1	2012	3	14.3774	9.8
Aquixalus_palpebralis	22.9833	103.683	1414.1	2013	3	16.4387	61.2
Aquixalus_palpebralis	22.9833	103.683	1414.1	2014	3	15.4516	33.3
Aquixalus_palpebralis	22.9833	103.683	1414.1	2015	3	16.8097	23.6
Aquixalus_palpebralis	22.9833	103.683	1414.1	2016	3	14.7161	21.8
Aquixalus_palpebralis	22.9833	103.683	1414.1	2012	4	19.93	43
Aquixalus_palpebralis	22.9833	103.683	1414.1	2013	4	17.84	77.8
Aquixalus_palpebralis	22.9833	103.683	1414.1	2014	4	19.3933	29
Aquixalus_palpebralis	22.9833	103.683	1414.1	2015	4	18.4067	84.7
Aquixalus_palpebralis	22.9833	103.683	1414.1	2016	4	20.0433	162.5
Aquixalus_palpebralis	22.9833	103.683	1414.1	2012	5	21.5742	104.3
Aquixalus_palpebralis	22.9833	103.683	1414.1	2013	5	20.8645	185.4
Aquixalus_palpebralis	22.9833	103.683	1414.1	2014	5	22.1516	28.8
Aquixalus_palpebralis	22.9833	103.683	1414.1	2015	5	22.6097	93.2
Aquixalus_palpebralis	22.9833	103.683	1414.1	2016	5	21.0677	157.3
Aquixalus_palpebralis	22.9833	103.683	1414.1	2012	6	21.2742	192.2
Aquixalus_palpebralis	22.9833	103.683	1414.1	2013	6	21.61	152.4
Aquixalus_palpebralis	22.9833	103.683	1414.1	2014	6	22.21	238.1
Aquixalus_palpebralis	22.9833	103.683	1414.1	2015	6	22.6733	234.4
Aquixalus_palpebralis	22.9833	103.683	1414.1	2016	6	21.8967	142.8
Aquixalus_palpebralis	22.9833	103.683	1414.1	2012	7	21.2742	459.2
Aquixalus_palpebralis	22.9833	103.683	1414.1	2013	7	20.929	331.1
Aquixalus_palpebralis	22.9833	103.683	1414.1	2014	7	21.5871	596.3
Aquixalus_palpebralis	22.9833	103.683	1414.1	2015	7	21.8032	90.8
Aquixalus_palpebralis	22.9833	103.683	1414.1	2016	7	21.9774	204.9
Aquixalus_palpebralis	22.9833	103.683	1414.1	2012	8	21.5806	234.4
Aquixalus_palpebralis	22.9833	103.683	1414.1	2013	8	20.8806	387.1
Aquixalus_palpebralis	22.9833	103.683	1414.1	2014	8	21.1968	215.1
Aquixalus_palpebralis	22.9833	103.683	1414.1	2015	8	21.2097	333.8
Aquixalus_palpebralis	22.9833	103.683	1414.1	2016	8	21.8	278
Aquixalus_palpebralis	22.9833	103.683	1414.1	2012	9	19.4067	138
Aquixalus_palpebralis	22.9833	103.683	1414.1	2013	9	19.4967	146.4
Aquixalus_palpebralis	22.9833	103.683	1414.1	2014	9	20.6367	221.1
Aquixalus_palpebralis	22.9833	103.683	1414.1	2015	9	20.7667	251.5
Aquixalus_palpebralis	22.9833	103.683	1414.1	2016	9	20.31	224.6
Aquixalus_palpebralis	22.9833	103.683	1414.1	2012	10	17.9613	25.2
Aquixalus_palpebralis	22.9833	103.683	1414.1	2013	10	16.2323	66
Aquixalus_palpebralis	22.9833	103.683	1414.1	2014	10	17.5387	131.9
Aquixalus_palpebralis	22.9833	103.683	1414.1	2015	10	17.9645	131.6
Aquixalus_palpebralis	22.9833	103.683	1414.1	2016	10	19.0387	21.2
Aquixalus_palpebralis	22.9833	103.683	1414.1	2012	11	15.4733	74.7
Aquixalus_palpebralis	22.9833	103.683	1414.1	2013	11	14.1767	9.6
Aquixalus_palpebralis	22.9833	103.683	1414.1	2014	11	14.3867	85
Aquixalus_palpebralis	22.9833	103.683	1414.1	2015	11	15.57	105.2
Aquixalus_palpebralis	22.9833	103.683	1414.1	2016	11	14.8033	110.3
Aquixalus_palpebralis	22.9833	103.683	1414.1	2012	12	11.5613	35
Aquixalus_palpebralis	22.9833	103.683	1414.1	2013	12	7.92581	129.4
Aquixalus_palpebralis	22.9833	103.683	1414.1	2014	12	9.09677	11.7
Aquixalus_palpebralis	22.9833	103.683	1414.1	2015	12	10.7484	102.1
Aquixalus_palpebralis	22.9833	103.683	1414.1	2016	12	11.8742	5.7
Babina_daunchina	29.5167	103.333	3047.4	2012	1	-8.33226	17.4
Babina_daunchina	29.5167	103.333	3047.4	2013	1	-5.90323	4.5
Babina_daunchina	29.5167	103.333	3047.4	2014	1	-3.63226	9.4
Babina_daunchina	29.5167	103.333	3047.4	2015	1	-3.64516	20.4
Babina_daunchina	29.5167	103.333	3047.4	2016	1	-6.1	18.7
Babina_daunchina	29.5167	103.333	3047.4	2012	2	-4.91379	11.5
Babina_daunchina	29.5167	103.333	3047.4	2013	2	-0.575	7.2
Babina_daunchina	29.5167	103.333	3047.4	2014	2	-4.79643	13.5
Babina_daunchina	29.5167	103.333	3047.4	2015	2	-2.73929	27.4
Babina_daunchina	29.5167	103.333	3047.4	2016	2	-5.22759	20.1
Babina_daunchina	29.5167	103.333	3047.4	2012	3	-1.98387	42.1
Babina_daunchina	29.5167	103.333	3047.4	2013	3	2.08387	34.4
Babina_daunchina	29.5167	103.333	3047.4	2014	3	-0.577419	79.6
Babina_daunchina	29.5167	103.333	3047.4	2015	3	0.416129	70.1
Babina_daunchina	29.5167	103.333	3047.4	2016	3	0.558065	126
Babina_daunchina	29.5167	103.333	3047.4	2012	4	3.53667	106.1
Babina_daunchina	29.5167	103.333	3047.4	2013	4	3.48333	106.2
Babina_daunchina	29.5167	103.333	3047.4	2014	4	4.09333	95.9
Babina_daunchina	29.5167	103.333	3047.4	2015	4	3.94333	84.8
Babina_daunchina	29.5167	103.333	3047.4	2016	4	4.12	136.1
Babina_daunchina	29.5167	103.333	3047.4	2012	5	7.14194	202.2
Babina_daunchina	29.5167	103.333	3047.4	2013	5	7.13871	176.2
Babina_daunchina	29.5167	103.333	3047.4	2014	5	5.99032	94.1
Babina_daunchina	29.5167	103.333	3047.4	2015	5	7.47742	203.9
Babina_daunchina	29.5167	103.333	3047.4	2016	5	8.01613	154.6
Babina_daunchina	29.5167	103.333	3047.4	2012	6	11.8677	274.9
Babina_daunchina	29.5167	103.333	3047.4	2013	6	11.6767	212.8
Babina_daunchina	29.5167	103.333	3047.4	2014	6	9.20333	369.1
Babina_daunchina	29.5167	103.333	3047.4	2015	6	10.4967	216
Babina_daunchina	29.5167	103.333	3047.4	2016	6	11.04	334.9
Babina_daunchina	29.5167	103.333	3047.4	2012	7	11.8677	564.4
Babina_daunchina	29.5167	103.333	3047.4	2013	7	13.3	300.8
Babina_daunchina	29.5167	103.333	3047.4	2014	7	12.4903	288.6
Babina_daunchina	29.5167	103.333	3047.4	2015	7	10.6645	325.2
Babina_daunchina	29.5167	103.333	3047.4	2016	7	13.0806	412.8
Babina_daunchina	29.5167	103.333	3047.4	2012	8	11.7258	365.7
Babina_daunchina	29.5167	103.333	3047.4	2013	8	12.2742	318
Babina_daunchina	29.5167	103.333	3047.4	2014	8	10.7645	681.1
Babina_daunchina	29.5167	103.333	3047.4	2015	8	10.6355	539.4
Babina_daunchina	29.5167	103.333	3047.4	2016	8	12.4774	200.2
Babina_daunchina	29.5167	103.333	3047.4	2012	9	7.89	166.7
Babina_daunchina	29.5167	103.333	3047.4	2013	9	8.62667	360.4
Babina_daunchina	29.5167	103.333	3047.4	2014	9	9.69667	169.8
Babina_daunchina	29.5167	103.333	3047.4	2015	9	8.17	226.6
Babina_daunchina	29.5167	103.333	3047.4	2016	9	8.22667	276.6
Babina_daunchina	29.5167	103.333	3047.4	2012	10	3.75161	101.3
Babina_daunchina	29.5167	103.333	3047.4	2013	10	4.13871	76.3
Babina_daunchina	29.5167	103.333	3047.4	2014	10	5.55484	122.7
Babina_daunchina	29.5167	103.333	3047.4	2015	10	5.65806	58.6
Babina_daunchina	29.5167	103.333	3047.4	2016	10	5.68065	121.7
Babina_daunchina	29.5167	103.333	3047.4	2012	11	-0.216667	16.6
Babina_daunchina	29.5167	103.333	3047.4	2013	11	0.11	32.2
Babina_daunchina	29.5167	103.333	3047.4	2014	11	-0.463333	26.1
Babina_daunchina	29.5167	103.333	3047.4	2015	11	2.85333	28.3
Babina_daunchina	29.5167	103.333	3047.4	2016	11	0.89	26.2
Babina_daunchina	29.5167	103.333	3047.4	2012	12	-3.16452	7.3
Babina_daunchina	29.5167	103.333	3047.4	2013	12	-5.50968	21.6
Babina_daunchina	29.5167	103.333	3047.4	2014	12	-4.99677	16.8
Babina_daunchina	29.5167	103.333	3047.4	2015	12	-4.35806	19.5
Babina_daunchina	29.5167	103.333	3047.4	2016	12	-2.18065	14
Bombina_maxima	26.85	100.217	2380.9	2012	1	6.81935	2
Bombina_maxima	26.85	100.217	2380.9	2013	1	6.73871	0
Bombina_maxima	26.85	100.217	2380.9	2014	1	7.49355	0.6
Bombina_maxima	26.85	100.217	2380.9	2015	1	7.74839	15.9
Bombina_maxima	26.85	100.217	2380.9	2016	1	5.60323	0
Bombina_maxima	26.85	100.217	2380.9	2012	2	9.52759	1.2
Bombina_maxima	26.85	100.217	2380.9	2013	2	11.0857	6.4
Bombina_maxima	26.85	100.217	2380.9	2014	2	9.38571	4.4
Bombina_maxima	26.85	100.217	2380.9	2015	2	9.38929	0
Bombina_maxima	26.85	100.217	2380.9	2016	2	8.71724	24.1
Bombina_maxima	26.85	100.217	2380.9	2012	3	11.5548	0.9
Bombina_maxima	26.85	100.217	2380.9	2013	3	12.9806	5
Bombina_maxima	26.85	100.217	2380.9	2014	3	12.3871	4.5
Bombina_maxima	26.85	100.217	2380.9	2015	3	13.9903	0.5
Bombina_maxima	26.85	100.217	2380.9	2016	3	12.1968	3.1
Bombina_maxima	26.85	100.217	2380.9	2012	4	14.46	1
Bombina_maxima	26.85	100.217	2380.9	2013	4	14.9267	6.6
Bombina_maxima	26.85	100.217	2380.9	2014	4	15.9767	12.5
Bombina_maxima	26.85	100.217	2380.9	2015	4	14.3067	25.7
Bombina_maxima	26.85	100.217	2380.9	2016	4	14.0433	32.5
Bombina_maxima	26.85	100.217	2380.9	2012	5	19.4355	16.4
Bombina_maxima	26.85	100.217	2380.9	2013	5	16.8839	94.5
Bombina_maxima	26.85	100.217	2380.9	2014	5	18.9548	2.2
Bombina_maxima	26.85	100.217	2380.9	2015	5	19.4581	14
Bombina_maxima	26.85	100.217	2380.9	2016	5	17.2065	80.1
Bombina_maxima	26.85	100.217	2380.9	2012	6	18.8161	128.6
Bombina_maxima	26.85	100.217	2380.9	2013	6	19.9833	108.6
Bombina_maxima	26.85	100.217	2380.9	2014	6	20.0167	219.9
Bombina_maxima	26.85	100.217	2380.9	2015	6	21.48	34.9
Bombina_maxima	26.85	100.217	2380.9	2016	6	18.94	165
Bombina_maxima	26.85	100.217	2380.9	2012	7	18.8161	182.3
Bombina_maxima	26.85	100.217	2380.9	2013	7	18.8968	367.5
Bombina_maxima	26.85	100.217	2380.9	2014	7	18.4774	358.8
Bombina_maxima	26.85	100.217	2380.9	2015	7	18.2097	134.9
Bombina_maxima	26.85	100.217	2380.9	2016	7	18.129	256.9
Bombina_maxima	26.85	100.217	2380.9	2012	8	18.0419	172.6
Bombina_maxima	26.85	100.217	2380.9	2013	8	17.8419	135.3
Bombina_maxima	26.85	100.217	2380.9	2014	8	17.8	192.5
Bombina_maxima	26.85	100.217	2380.9	2015	8	17.3742	341.4
Bombina_maxima	26.85	100.217	2380.9	2016	8	18.8903	143.1
Bombina_maxima	26.85	100.217	2380.9	2012	9	16.2133	116.4
Bombina_maxima	26.85	100.217	2380.9	2013	9	16.1633	124
Bombina_maxima	26.85	100.217	2380.9	2014	9	17.3267	108.6
Bombina_maxima	26.85	100.217	2380.9	2015	9	17.6633	230.5
Bombina_maxima	26.85	100.217	2380.9	2016	9	16.7333	170.1
Bombina_maxima	26.85	100.217	2380.9	2012	10	13.8742	33.6
Bombina_maxima	26.85	100.217	2380.9	2013	10	12.8903	43.3
Bombina_maxima	26.85	100.217	2380.9	2014	10	13.6226	11.3
Bombina_maxima	26.85	100.217	2380.9	2015	10	13.2484	96.7
Bombina_maxima	26.85	100.217	2380.9	2016	10	15.0774	28.4
Bombina_maxima	26.85	100.217	2380.9	2012	11	10.4667	0
Bombina_maxima	26.85	100.217	2380.9	2013	11	8.90333	0
Bombina_maxima	26.85	100.217	2380.9	2014	11	10.4333	0
Bombina_maxima	26.85	100.217	2380.9	2015	11	10.3667	1.5
Bombina_maxima	26.85	100.217	2380.9	2016	11	10.4467	58.4
Bombina_maxima	26.85	100.217	2380.9	2012	12	7.41613	0
Bombina_maxima	26.85	100.217	2380.9	2013	12	5.71613	5.1
Bombina_maxima	26.85	100.217	2380.9	2014	12	7.86452	2.6
Bombina_maxima	26.85	100.217	2380.9	2015	12	6.82903	1.3
Bombina_maxima	26.85	100.217	2380.9	2016	12	7.6	4.6
Brachytarsophrys_chuannanensis	27.35	103.717	1949.5	2012	1	0.303226	5.3
Brachytarsophrys_chuannanensis	27.35	103.717	1949.5	2013	1	2.76129	2.5
Brachytarsophrys_chuannanensis	27.35	103.717	1949.5	2014	1	3.40323	3.6
Brachytarsophrys_chuannanensis	27.35	103.717	1949.5	2015	1	3.85484	19.9
Brachytarsophrys_chuannanensis	27.35	103.717	1949.5	2016	1	2.39677	4.5
Brachytarsophrys_chuannanensis	27.35	103.717	1949.5	2012	2	3.74138	0.5
Brachytarsophrys_chuannanensis	27.35	103.717	1949.5	2013	2	8.96071	0.7
Brachytarsophrys_chuannanensis	27.35	103.717	1949.5	2014	2	3.875	16.9
Brachytarsophrys_chuannanensis	27.35	103.717	1949.5	2015	2	6.46429	0.1
Brachytarsophrys_chuannanensis	27.35	103.717	1949.5	2016	2	3.12414	11.9
Brachytarsophrys_chuannanensis	27.35	103.717	1949.5	2012	3	8.59677	12.4
Brachytarsophrys_chuannanensis	27.35	103.717	1949.5	2013	3	11.5774	34.6
Brachytarsophrys_chuannanensis	27.35	103.717	1949.5	2014	3	8.95161	16.1
Brachytarsophrys_chuannanensis	27.35	103.717	1949.5	2015	3	11.3935	20.9
Brachytarsophrys_chuannanensis	27.35	103.717	1949.5	2016	3	9.78387	17.2
Brachytarsophrys_chuannanensis	27.35	103.717	1949.5	2012	4	13.9667	13.9
Brachytarsophrys_chuannanensis	27.35	103.717	1949.5	2013	4	13.5133	50.8
Brachytarsophrys_chuannanensis	27.35	103.717	1949.5	2014	4	14.43	36.8
Brachytarsophrys_chuannanensis	27.35	103.717	1949.5	2015	4	13.8233	45.2
Brachytarsophrys_chuannanensis	27.35	103.717	1949.5	2016	4	13.4867	53.6
Brachytarsophrys_chuannanensis	27.35	103.717	1949.5	2012	5	17.6129	38.5
Brachytarsophrys_chuannanensis	27.35	103.717	1949.5	2013	5	16.4129	97.7
Brachytarsophrys_chuannanensis	27.35	103.717	1949.5	2014	5	15.8419	43.9
Brachytarsophrys_chuannanensis	27.35	103.717	1949.5	2015	5	17.229	42.7
Brachytarsophrys_chuannanensis	27.35	103.717	1949.5	2016	5	16.8323	112.8
Brachytarsophrys_chuannanensis	27.35	103.717	1949.5	2012	6	20.171	139.3
Brachytarsophrys_chuannanensis	27.35	103.717	1949.5	2013	6	20.1767	151.4
Brachytarsophrys_chuannanensis	27.35	103.717	1949.5	2014	6	17.6533	126.7
Brachytarsophrys_chuannanensis	27.35	103.717	1949.5	2015	6	19.7733	103.7
Brachytarsophrys_chuannanensis	27.35	103.717	1949.5	2016	6	18.8633	280.9
Brachytarsophrys_chuannanensis	27.35	103.717	1949.5	2012	7	20.171	148.1
Brachytarsophrys_chuannanensis	27.35	103.717	1949.5	2013	7	21.8258	148.1
Brachytarsophrys_chuannanensis	27.35	103.717	1949.5	2014	7	19.7645	184.5
Brachytarsophrys_chuannanensis	27.35	103.717	1949.5	2015	7	18.5774	196.7
Brachytarsophrys_chuannanensis	27.35	103.717	1949.5	2016	7	21.1355	148.8
Brachytarsophrys_chuannanensis	27.35	103.717	1949.5	2012	8	19.9516	57.1
Brachytarsophrys_chuannanensis	27.35	103.717	1949.5	2013	8	19.8839	222.8
Brachytarsophrys_chuannanensis	27.35	103.717	1949.5	2014	8	18.8387	268.2
Brachytarsophrys_chuannanensis	27.35	103.717	1949.5	2015	8	18.2935	223.9
Brachytarsophrys_chuannanensis	27.35	103.717	1949.5	2016	8	20.3258	90.4
Brachytarsophrys_chuannanensis	27.35	103.717	1949.5	2012	9	16.0233	111.7
Brachytarsophrys_chuannanensis	27.35	103.717	1949.5	2013	9	16.7633	92.4
Brachytarsophrys_chuannanensis	27.35	103.717	1949.5	2014	9	18.66	64.5
Brachytarsophrys_chuannanensis	27.35	103.717	1949.5	2015	9	16.81	87.6
Brachytarsophrys_chuannanensis	27.35	103.717	1949.5	2016	9	16.1667	138.3
Brachytarsophrys_chuannanensis	27.35	103.717	1949.5	2012	10	12.7097	29.8
Brachytarsophrys_chuannanensis	27.35	103.717	1949.5	2013	10	11.4968	61.8
Brachytarsophrys_chuannanensis	27.35	103.717	1949.5	2014	10	13.6	49
Brachytarsophrys_chuannanensis	27.35	103.717	1949.5	2015	10	13.6258	77
Brachytarsophrys_chuannanensis	27.35	103.717	1949.5	2016	10	14.1935	46.7
Brachytarsophrys_chuannanensis	27.35	103.717	1949.5	2012	11	8.81	5.5
Brachytarsophrys_chuannanensis	27.35	103.717	1949.5	2013	11	8.93333	0.6
Brachytarsophrys_chuannanensis	27.35	103.717	1949.5	2014	11	7.96333	13.5
Brachytarsophrys_chuannanensis	27.35	103.717	1949.5	2015	11	11.0667	0.2
Brachytarsophrys_chuannanensis	27.35	103.717	1949.5	2016	11	8.53667	26.7
Brachytarsophrys_chuannanensis	27.35	103.717	1949.5	2012	12	4.1	0.2
Brachytarsophrys_chuannanensis	27.35	103.717	1949.5	2013	12	1.94516	7.8
Brachytarsophrys_chuannanensis	27.35	103.717	1949.5	2014	12	2.20645	2.3
Brachytarsophrys_chuannanensis	27.35	103.717	1949.5	2015	12	3.92581	20.6
Brachytarsophrys_chuannanensis	27.35	103.717	1949.5	2016	12	5.33226	7.2
Brachytarsophrys_feae	26.6	107.983	720.3	2012	1	2.19355	47
Brachytarsophrys_feae	26.6	107.983	720.3	2013	1	5.70323	13.4
Brachytarsophrys_feae	26.6	107.983	720.3	2014	1	7.40645	8.7
Brachytarsophrys_feae	26.6	107.983	720.3	2015	1	7.23871	43.5
Brachytarsophrys_feae	26.6	107.983	720.3	2016	1	5.17097	49.2
Brachytarsophrys_feae	26.6	107.983	720.3	2012	2	3.42414	29
Brachytarsophrys_feae	26.6	107.983	720.3	2013	2	8.62143	30.5
Brachytarsophrys_feae	26.6	107.983	720.3	2014	2	4.72143	42
Brachytarsophrys_feae	26.6	107.983	720.3	2015	2	8.46429	48.8
Brachytarsophrys_feae	26.6	107.983	720.3	2016	2	8.05172	11.3
Brachytarsophrys_feae	26.6	107.983	720.3	2012	3	9.62903	57.2
Brachytarsophrys_feae	26.6	107.983	720.3	2013	3	14.7097	199.3
Brachytarsophrys_feae	26.6	107.983	720.3	2014	3	11.8839	89.6
Brachytarsophrys_feae	26.6	107.983	720.3	2015	3	11.8839	32.1
Brachytarsophrys_feae	26.6	107.983	720.3	2016	3	12.0387	105.1
Brachytarsophrys_feae	26.6	107.983	720.3	2012	4	18.3667	79.3
Brachytarsophrys_feae	26.6	107.983	720.3	2013	4	15.5467	136
Brachytarsophrys_feae	26.6	107.983	720.3	2014	4	17.2467	83.2
Brachytarsophrys_feae	26.6	107.983	720.3	2015	4	17.7333	50
Brachytarsophrys_feae	26.6	107.983	720.3	2016	4	18.0767	159.7
Brachytarsophrys_feae	26.6	107.983	720.3	2012	5	20.6387	205
Brachytarsophrys_feae	26.6	107.983	720.3	2013	5	20.5935	275.5
Brachytarsophrys_feae	26.6	107.983	720.3	2014	5	19.5968	189.1
Brachytarsophrys_feae	26.6	107.983	720.3	2015	5	21.529	335.6
Brachytarsophrys_feae	26.6	107.983	720.3	2016	5	20.271	162.9
Brachytarsophrys_feae	26.6	107.983	720.3	2012	6	26.1387	126.2
Brachytarsophrys_feae	26.6	107.983	720.3	2013	6	24.4567	168.5
Brachytarsophrys_feae	26.6	107.983	720.3	2014	6	23.37	199
Brachytarsophrys_feae	26.6	107.983	720.3	2015	6	24.5567	391.4
Brachytarsophrys_feae	26.6	107.983	720.3	2016	6	25.1533	184.8
Brachytarsophrys_feae	26.6	107.983	720.3	2012	7	26.1387	275.6
Brachytarsophrys_feae	26.6	107.983	720.3	2013	7	26.9806	35.2
Brachytarsophrys_feae	26.6	107.983	720.3	2014	7	25.4548	236.7
Brachytarsophrys_feae	26.6	107.983	720.3	2015	7	23.9032	134.9
Brachytarsophrys_feae	26.6	107.983	720.3	2016	7	27.0516	268
Brachytarsophrys_feae	26.6	107.983	720.3	2012	8	24.8484	62.9
Brachytarsophrys_feae	26.6	107.983	720.3	2013	8	26.0484	123.9
Brachytarsophrys_feae	26.6	107.983	720.3	2014	8	24.4161	76.4
Brachytarsophrys_feae	26.6	107.983	720.3	2015	8	23.9129	210.6
Brachytarsophrys_feae	26.6	107.983	720.3	2016	8	25.4194	177.9
Brachytarsophrys_feae	26.6	107.983	720.3	2012	9	20.4333	102.5
Brachytarsophrys_feae	26.6	107.983	720.3	2013	9	20.83	181
Brachytarsophrys_feae	26.6	107.983	720.3	2014	9	23.1333	106.6
Brachytarsophrys_feae	26.6	107.983	720.3	2015	9	21.7933	129.4
Brachytarsophrys_feae	26.6	107.983	720.3	2016	9	22.9267	32.8
Brachytarsophrys_feae	26.6	107.983	720.3	2012	10	17.0323	65.1
Brachytarsophrys_feae	26.6	107.983	720.3	2013	10	16.129	68.1
Brachytarsophrys_feae	26.6	107.983	720.3	2014	10	18.871	71.8
Brachytarsophrys_feae	26.6	107.983	720.3	2015	10	17.9839	119
Brachytarsophrys_feae	26.6	107.983	720.3	2016	10	19.1839	65.7
Brachytarsophrys_feae	26.6	107.983	720.3	2012	11	10.8333	45.8
Brachytarsophrys_feae	26.6	107.983	720.3	2013	11	13.39	65.2
Brachytarsophrys_feae	26.6	107.983	720.3	2014	11	11.6767	96.4
Brachytarsophrys_feae	26.6	107.983	720.3	2015	11	13.1133	73.8
Brachytarsophrys_feae	26.6	107.983	720.3	2016	11	12.8267	69.2
Brachytarsophrys_feae	26.6	107.983	720.3	2012	12	5.87419	26
Brachytarsophrys_feae	26.6	107.983	720.3	2013	12	6.70323	46
Brachytarsophrys_feae	26.6	107.983	720.3	2014	12	6.97419	5.9
Brachytarsophrys_feae	26.6	107.983	720.3	2015	12	6.76452	82.8
Brachytarsophrys_feae	26.6	107.983	720.3	2016	12	8.4871	36.2
Bufo_andrewsi	30.75	103.867	547.7	2012	1	5.03871	13.6
Bufo_andrewsi	30.75	103.867	547.7	2013	1	5.32581	1.2
Bufo_andrewsi	30.75	103.867	547.7	2014	1	6.04194	1.1
Bufo_andrewsi	30.75	103.867	547.7	2015	1	6.82258	3.1
Bufo_andrewsi	30.75	103.867	547.7	2016	1	5.66452	11.4
Bufo_andrewsi	30.75	103.867	547.7	2012	2	6.04483	6.3
Bufo_andrewsi	30.75	103.867	547.7	2013	2	9.34286	4.7
Bufo_andrewsi	30.75	103.867	547.7	2014	2	6.72143	8.7
Bufo_andrewsi	30.75	103.867	547.7	2015	2	8.63214	2.8
Bufo_andrewsi	30.75	103.867	547.7	2016	2	7.33793	25
Bufo_andrewsi	30.75	103.867	547.7	2012	3	11.2161	26.2
Bufo_andrewsi	30.75	103.867	547.7	2013	3	15.6677	7.6
Bufo_andrewsi	30.75	103.867	547.7	2014	3	11.8645	13
Bufo_andrewsi	30.75	103.867	547.7	2015	3	13.2645	8.1
Bufo_andrewsi	30.75	103.867	547.7	2016	3	13.1452	33.9
Bufo_andrewsi	30.75	103.867	547.7	2012	4	17.6733	17.6
Bufo_andrewsi	30.75	103.867	547.7	2013	4	17.7033	42.2
Bufo_andrewsi	30.75	103.867	547.7	2014	4	17.8533	46.2
Bufo_andrewsi	30.75	103.867	547.7	2015	4	17.5867	87.4
Bufo_andrewsi	30.75	103.867	547.7	2016	4	17.63	59.2
Bufo_andrewsi	30.75	103.867	547.7	2012	5	21.1806	118.8
Bufo_andrewsi	30.75	103.867	547.7	2013	5	21.1774	99
Bufo_andrewsi	30.75	103.867	547.7	2014	5	20.4355	51.9
Bufo_andrewsi	30.75	103.867	547.7	2015	5	21.9581	51.8
Bufo_andrewsi	30.75	103.867	547.7	2016	5	20.7516	89.3
Bufo_andrewsi	30.75	103.867	547.7	2012	6	22.4867	74.9
Bufo_andrewsi	30.75	103.867	547.7	2013	6	24.5367	182.1
Bufo_andrewsi	30.75	103.867	547.7	2014	6	22.8933	132.2
Bufo_andrewsi	30.75	103.867	547.7	2015	6	23.8733	90.8
Bufo_andrewsi	30.75	103.867	547.7	2016	6	24.6567	80.3
Bufo_andrewsi	30.75	103.867	547.7	2012	7	24.8387	143.1
Bufo_andrewsi	30.75	103.867	547.7	2013	7	25.8032	525.5
Bufo_andrewsi	30.75	103.867	547.7	2014	7	25.329	389.5
Bufo_andrewsi	30.75	103.867	547.7	2015	7	25.1	92.2
Bufo_andrewsi	30.75	103.867	547.7	2016	7	25.9226	349.9
Bufo_andrewsi	30.75	103.867	547.7	2012	8	25.9935	64.1
Bufo_andrewsi	30.75	103.867	547.7	2013	8	26.4935	228.3
Bufo_andrewsi	30.75	103.867	547.7	2014	8	24.0452	180.8
Bufo_andrewsi	30.75	103.867	547.7	2015	8	23.8516	291.9
Bufo_andrewsi	30.75	103.867	547.7	2016	8	26.5032	173
Bufo_andrewsi	30.75	103.867	547.7	2012	9	20.8867	76.7
Bufo_andrewsi	30.75	103.867	547.7	2013	9	20.77	196.2
Bufo_andrewsi	30.75	103.867	547.7	2014	9	21.5967	51.6
Bufo_andrewsi	30.75	103.867	547.7	2015	9	21.0967	205.7
Bufo_andrewsi	30.75	103.867	547.7	2016	9	21.5133	126.3
Bufo_andrewsi	30.75	103.867	547.7	2012	10	17.2	57
Bufo_andrewsi	30.75	103.867	547.7	2013	10	17.6323	27.1
Bufo_andrewsi	30.75	103.867	547.7	2014	10	17.6742	77.8
Bufo_andrewsi	30.75	103.867	547.7	2015	10	18.2452	23
Bufo_andrewsi	30.75	103.867	547.7	2016	10	17.8806	13.6
Bufo_andrewsi	30.75	103.867	547.7	2012	11	11.0033	9.7
Bufo_andrewsi	30.75	103.867	547.7	2013	11	12.02	21.8
Bufo_andrewsi	30.75	103.867	547.7	2014	11	11.7567	16.5
Bufo_andrewsi	30.75	103.867	547.7	2015	11	13.5133	9.8
Bufo_andrewsi	30.75	103.867	547.7	2016	11	11.9167	20.7
Bufo_andrewsi	30.75	103.867	547.7	2012	12	6.75484	2.9
Bufo_andrewsi	30.75	103.867	547.7	2013	12	6.0129	7.6
Bufo_andrewsi	30.75	103.867	547.7	2014	12	5.82581	5.7
Bufo_andrewsi	30.75	103.867	547.7	2015	12	7.35806	13.6
Bufo_andrewsi	30.75	103.867	547.7	2016	12	8.49032	1.3
Bufo_gargarizans	30.7833	106.1	309.7	2012	1	6.5	36.7
Bufo_gargarizans	30.7833	106.1	309.7	2013	1	7.01613	10.8
Bufo_gargarizans	30.7833	106.1	309.7	2014	1	7.20645	1.1
Bufo_gargarizans	30.7833	106.1	309.7	2015	1	8.4871	19.5
Bufo_gargarizans	30.7833	106.1	309.7	2016	1	6.28387	27.4
Bufo_gargarizans	30.7833	106.1	309.7	2012	2	7.43793	24.5
Bufo_gargarizans	30.7833	106.1	309.7	2013	2	10.6857	10.4
Bufo_gargarizans	30.7833	106.1	309.7	2014	2	8.01786	23.2
Bufo_gargarizans	30.7833	106.1	309.7	2015	2	10.275	7.8
Bufo_gargarizans	30.7833	106.1	309.7	2016	2	8.73103	14.6
Bufo_gargarizans	30.7833	106.1	309.7	2012	3	13.3258	28.7
Bufo_gargarizans	30.7833	106.1	309.7	2013	3	17.2742	15.5
Bufo_gargarizans	30.7833	106.1	309.7	2014	3	13.3548	50.9
Bufo_gargarizans	30.7833	106.1	309.7	2015	3	15.8194	4.1
Bufo_gargarizans	30.7833	106.1	309.7	2016	3	14.4677	36.8
Bufo_gargarizans	30.7833	106.1	309.7	2012	4	20.1333	21.7
Bufo_gargarizans	30.7833	106.1	309.7	2013	4	20.5133	19.5
Bufo_gargarizans	30.7833	106.1	309.7	2014	4	19.53	89.1
Bufo_gargarizans	30.7833	106.1	309.7	2015	4	20.23	69.9
Bufo_gargarizans	30.7833	106.1	309.7	2016	4	18.62	69.6
Bufo_gargarizans	30.7833	106.1	309.7	2012	5	22.7194	176.2
Bufo_gargarizans	30.7833	106.1	309.7	2013	5	22.3452	199.7
Bufo_gargarizans	30.7833	106.1	309.7	2014	5	21.2806	57.9
Bufo_gargarizans	30.7833	106.1	309.7	2015	5	23.129	84.7
Bufo_gargarizans	30.7833	106.1	309.7	2016	5	21.1903	150.3
Bufo_gargarizans	30.7833	106.1	309.7	2012	6	27.1387	162.7
Bufo_gargarizans	30.7833	106.1	309.7	2013	6	27.4433	163.9
Bufo_gargarizans	30.7833	106.1	309.7	2014	6	24.3433	252.6
Bufo_gargarizans	30.7833	106.1	309.7	2015	6	25.49	129.5
Bufo_gargarizans	30.7833	106.1	309.7	2016	6	25.4433	104.5
Bufo_gargarizans	30.7833	106.1	309.7	2012	7	27.1387	249.3
Bufo_gargarizans	30.7833	106.1	309.7	2013	7	29.3484	185.7
Bufo_gargarizans	30.7833	106.1	309.7	2014	7	29.1516	83.9
Bufo_gargarizans	30.7833	106.1	309.7	2015	7	28.5097	63.3
Bufo_gargarizans	30.7833	106.1	309.7	2016	7	28.2161	181.4
Bufo_gargarizans	30.7833	106.1	309.7	2012	8	29.171	201.6
Bufo_gargarizans	30.7833	106.1	309.7	2013	8	29.1677	136.2
Bufo_gargarizans	30.7833	106.1	309.7	2014	8	26.9839	169.8
Bufo_gargarizans	30.7833	106.1	309.7	2015	8	27.5452	392.3
Bufo_gargarizans	30.7833	106.1	309.7	2016	8	28.1258	61.8
Bufo_gargarizans	30.7833	106.1	309.7	2012	9	22.5133	207.5
Bufo_gargarizans	30.7833	106.1	309.7	2013	9	22.5733	97.9
Bufo_gargarizans	30.7833	106.1	309.7	2014	9	23.2033	195.1
Bufo_gargarizans	30.7833	106.1	309.7	2015	9	23.1367	153.2
Bufo_gargarizans	30.7833	106.1	309.7	2016	9	22.54	75.5
Bufo_gargarizans	30.7833	106.1	309.7	2012	10	18.0323	47.7
Bufo_gargarizans	30.7833	106.1	309.7	2013	10	19.171	57.6
Bufo_gargarizans	30.7833	106.1	309.7	2014	10	19.4258	160.5
Bufo_gargarizans	30.7833	106.1	309.7	2015	10	19.6355	132.5
Bufo_gargarizans	30.7833	106.1	309.7	2016	10	18.4	111.3
Bufo_gargarizans	30.7833	106.1	309.7	2012	11	12.5533	12.6
Bufo_gargarizans	30.7833	106.1	309.7	2013	11	13.62	45.2
Bufo_gargarizans	30.7833	106.1	309.7	2014	11	13.41	20.4
Bufo_gargarizans	30.7833	106.1	309.7	2015	11	15.0433	21.4
Bufo_gargarizans	30.7833	106.1	309.7	2016	11	12.47	65.5
Bufo_gargarizans	30.7833	106.1	309.7	2012	12	8.2	4.1
Bufo_gargarizans	30.7833	106.1	309.7	2013	12	7.70968	5.5
Bufo_gargarizans	30.7833	106.1	309.7	2014	12	8.08387	2.1
Bufo_gargarizans	30.7833	106.1	309.7	2015	12	9.29677	15.6
Bufo_gargarizans	30.7833	106.1	309.7	2016	12	9.1129	12.6
Bufo_melanostictus	25.9667	108.533	285.7	2012	1	5.83871	49.3
Bufo_melanostictus	25.9667	108.533	285.7	2013	1	8.25484	17.7
Bufo_melanostictus	25.9667	108.533	285.7	2014	1	9.54839	14.9
Bufo_melanostictus	25.9667	108.533	285.7	2015	1	10.0355	43.3
Bufo_melanostictus	25.9667	108.533	285.7	2016	1	8.73871	34.4
Bufo_melanostictus	25.9667	108.533	285.7	2012	2	6.98621	16.3
Bufo_melanostictus	25.9667	108.533	285.7	2013	2	11.9429	12.4
Bufo_melanostictus	25.9667	108.533	285.7	2014	2	8.23214	49.2
Bufo_melanostictus	25.9667	108.533	285.7	2015	2	11.8286	33.4
Bufo_melanostictus	25.9667	108.533	285.7	2016	2	10.1586	16.6
Bufo_melanostictus	25.9667	108.533	285.7	2012	3	13.5129	70.4
Bufo_melanostictus	25.9667	108.533	285.7	2013	3	17.2452	135.5
Bufo_melanostictus	25.9667	108.533	285.7	2014	3	14.9161	63.8
Bufo_melanostictus	25.9667	108.533	285.7	2015	3	14.8194	25.1
Bufo_melanostictus	25.9667	108.533	285.7	2016	3	14.2548	90.1
Bufo_melanostictus	25.9667	108.533	285.7	2012	4	21.26	68.5
Bufo_melanostictus	25.9667	108.533	285.7	2013	4	18.96	126
Bufo_melanostictus	25.9667	108.533	285.7	2014	4	19.6833	69.5
Bufo_melanostictus	25.9667	108.533	285.7	2015	4	20.5567	87.1
Bufo_melanostictus	25.9667	108.533	285.7	2016	4	20.2933	320.3
Bufo_melanostictus	25.9667	108.533	285.7	2012	5	23.4097	242.1
Bufo_melanostictus	25.9667	108.533	285.7	2013	5	23.4516	259.3
Bufo_melanostictus	25.9667	108.533	285.7	2014	5	22.5935	130.4
Bufo_melanostictus	25.9667	108.533	285.7	2015	5	23.9323	322.2
Bufo_melanostictus	25.9667	108.533	285.7	2016	5	22.4484	246.3
Bufo_melanostictus	25.9667	108.533	285.7	2012	6	27.5774	155.7
Bufo_melanostictus	25.9667	108.533	285.7	2013	6	26.1567	169.6
Bufo_melanostictus	25.9667	108.533	285.7	2014	6	25.9933	208
Bufo_melanostictus	25.9667	108.533	285.7	2015	6	26.4967	357.7
Bufo_melanostictus	25.9667	108.533	285.7	2016	6	26.79	287.9
Bufo_melanostictus	25.9667	108.533	285.7	2012	7	27.5774	171.2
Bufo_melanostictus	25.9667	108.533	285.7	2013	7	28.2452	7.2
Bufo_melanostictus	25.9667	108.533	285.7	2014	7	27.6742	134.3
Bufo_melanostictus	25.9667	108.533	285.7	2015	7	25.9419	171.2
Bufo_melanostictus	25.9667	108.533	285.7	2016	7	28.2613	150.7
Bufo_melanostictus	25.9667	108.533	285.7	2012	8	26.9613	43.7
Bufo_melanostictus	25.9667	108.533	285.7	2013	8	27.5226	81.1
Bufo_melanostictus	25.9667	108.533	285.7	2014	8	26.429	201.1
Bufo_melanostictus	25.9667	108.533	285.7	2015	8	26.2774	210.5
Bufo_melanostictus	25.9667	108.533	285.7	2016	8	27.1452	177.9
Bufo_melanostictus	25.9667	108.533	285.7	2012	9	22.9667	51.3
Bufo_melanostictus	25.9667	108.533	285.7	2013	9	23.2767	116.3
Bufo_melanostictus	25.9667	108.533	285.7	2014	9	25.5633	139.2
Bufo_melanostictus	25.9667	108.533	285.7	2015	9	24.2	175.4
Bufo_melanostictus	25.9667	108.533	285.7	2016	9	24.91	64.7
Bufo_melanostictus	25.9667	108.533	285.7	2012	10	20.1935	35.4
Bufo_melanostictus	25.9667	108.533	285.7	2013	10	18.8806	53.8
Bufo_melanostictus	25.9667	108.533	285.7	2014	10	21.4	64.3
Bufo_melanostictus	25.9667	108.533	285.7	2015	10	20.3613	99.5
Bufo_melanostictus	25.9667	108.533	285.7	2016	10	21.8742	96.2
Bufo_melanostictus	25.9667	108.533	285.7	2012	11	14.1967	69
Bufo_melanostictus	25.9667	108.533	285.7	2013	11	15.5967	53.6
Bufo_melanostictus	25.9667	108.533	285.7	2014	11	15.1233	114.4
Bufo_melanostictus	25.9667	108.533	285.7	2015	11	15.9533	139.7
Bufo_melanostictus	25.9667	108.533	285.7	2016	11	15.5833	54.6
Bufo_melanostictus	25.9667	108.533	285.7	2012	12	9.21935	27
Bufo_melanostictus	25.9667	108.533	285.7	2013	12	9.5129	58.9
Bufo_melanostictus	25.9667	108.533	285.7	2014	12	9.57742	11.1
Bufo_melanostictus	25.9667	108.533	285.7	2015	12	10.2613	73.8
Bufo_melanostictus	25.9667	108.533	285.7	2016	12	11.2065	31.3
Bufo_minshanicus	32.8	102.55	3491.6	2012	1	-8.19032	7.5
Bufo_minshanicus	32.8	102.55	3491.6	2013	1	-8.85161	4.5
Bufo_minshanicus	32.8	102.55	3491.6	2014	1	-8.42581	4.5
Bufo_minshanicus	32.8	102.55	3491.6	2015	1	-9.02903	18.3
Bufo_minshanicus	32.8	102.55	3491.6	2016	1	-10.729	13.9
Bufo_minshanicus	32.8	102.55	3491.6	2012	2	-4.22069	18
Bufo_minshanicus	32.8	102.55	3491.6	2013	2	-3.52857	10.1
Bufo_minshanicus	32.8	102.55	3491.6	2014	2	-5.66429	11
Bufo_minshanicus	32.8	102.55	3491.6	2015	2	-4.31071	0.3
Bufo_minshanicus	32.8	102.55	3491.6	2016	2	-5.48966	13.4
Bufo_minshanicus	32.8	102.55	3491.6	2012	3	-1.56129	40.9
Bufo_minshanicus	32.8	102.55	3491.6	2013	3	0.274194	14.2
Bufo_minshanicus	32.8	102.55	3491.6	2014	3	-0.929032	32.8
Bufo_minshanicus	32.8	102.55	3491.6	2015	3	0.693548	14.5
Bufo_minshanicus	32.8	102.55	3491.6	2016	3	-0.641935	34.2
Bufo_minshanicus	32.8	102.55	3491.6	2012	4	2.55	35.5
Bufo_minshanicus	32.8	102.55	3491.6	2013	4	2.87	34.5
Bufo_minshanicus	32.8	102.55	3491.6	2014	4	3.02333	45.8
Bufo_minshanicus	32.8	102.55	3491.6	2015	4	2.71333	48.3
Bufo_minshanicus	32.8	102.55	3491.6	2016	4	3.49	85.2
Bufo_minshanicus	32.8	102.55	3491.6	2012	5	7.54194	102.8
Bufo_minshanicus	32.8	102.55	3491.6	2013	5	5.81935	135.6
Bufo_minshanicus	32.8	102.55	3491.6	2014	5	6.40645	139.7
Bufo_minshanicus	32.8	102.55	3491.6	2015	5	7.23548	114.7
Bufo_minshanicus	32.8	102.55	3491.6	2016	5	7.38065	68.5
Bufo_minshanicus	32.8	102.55	3491.6	2012	6	12.1613	186.8
Bufo_minshanicus	32.8	102.55	3491.6	2013	6	11.4733	143.8
Bufo_minshanicus	32.8	102.55	3491.6	2014	6	10.1733	138.7
Bufo_minshanicus	32.8	102.55	3491.6	2015	6	11.07	196.8
Bufo_minshanicus	32.8	102.55	3491.6	2016	6	9.37667	94.9
Bufo_minshanicus	32.8	102.55	3491.6	2012	7	12.1613	208
Bufo_minshanicus	32.8	102.55	3491.6	2013	7	12.7871	188.3
Bufo_minshanicus	32.8	102.55	3491.6	2014	7	11.9677	100.8
Bufo_minshanicus	32.8	102.55	3491.6	2015	7	9.76774	73.8
Bufo_minshanicus	32.8	102.55	3491.6	2016	7	12.2161	115.5
Bufo_minshanicus	32.8	102.55	3491.6	2012	8	11.6097	142.8
Bufo_minshanicus	32.8	102.55	3491.6	2013	8	11.1774	70.9
Bufo_minshanicus	32.8	102.55	3491.6	2014	8	10.2645	170.2
Bufo_minshanicus	32.8	102.55	3491.6	2015	8	9.73226	89.6
Bufo_minshanicus	32.8	102.55	3491.6	2016	8	12.6419	45.3
Bufo_minshanicus	32.8	102.55	3491.6	2012	9	7.64667	110.3
Bufo_minshanicus	32.8	102.55	3491.6	2013	9	7.33667	104.6
Bufo_minshanicus	32.8	102.55	3491.6	2014	9	9.11	212.1
Bufo_minshanicus	32.8	102.55	3491.6	2015	9	9.40667	108.2
Bufo_minshanicus	32.8	102.55	3491.6	2016	9	6.92333	121
Bufo_minshanicus	32.8	102.55	3491.6	2012	10	3.17419	58.2
Bufo_minshanicus	32.8	102.55	3491.6	2013	10	2.43226	33.1
Bufo_minshanicus	32.8	102.55	3491.6	2014	10	3.40968	43.1
Bufo_minshanicus	32.8	102.55	3491.6	2015	10	4.49355	39.1
Bufo_minshanicus	32.8	102.55	3491.6	2016	10	4.04516	108.8
Bufo_minshanicus	32.8	102.55	3491.6	2012	11	-3.59333	7.4
Bufo_minshanicus	32.8	102.55	3491.6	2013	11	-3.86667	12.5
Bufo_minshanicus	32.8	102.55	3491.6	2014	11	-1.56	5.3
Bufo_minshanicus	32.8	102.55	3491.6	2015	11	-0.533333	4.2
Bufo_minshanicus	32.8	102.55	3491.6	2016	11	-1.13333	7.6
Bufo_minshanicus	32.8	102.55	3491.6	2012	12	-6.87742	2.4
Bufo_minshanicus	32.8	102.55	3491.6	2013	12	-9.89355	1.1
Bufo_minshanicus	32.8	102.55	3491.6	2014	12	-7.31935	4.3
Bufo_minshanicus	32.8	102.55	3491.6	2015	12	-9.65161	11.5
Bufo_minshanicus	32.8	102.55	3491.6	2016	12	-5.11613	2.1
Bufo_raddei	40.1	113.143	1000	2012	1	-11.271	0.5
Bufo_raddei	40.1	113.143	1000	2013	1	-11.2548	2.1
Bufo_raddei	40.1	113.143	1000	2014	1	-8.45161	0
Bufo_raddei	40.1	113.143	1000	2015	1	-8.82581	10.3
Bufo_raddei	40.1	113.143	1000	2016	1	-12.9548	0.6
Bufo_raddei	40.1	113.143	1000	2012	2	-8.43103	0.1
Bufo_raddei	40.1	113.143	1000	2013	2	-6.44643	0.1
Bufo_raddei	40.1	113.143	1000	2014	2	-7.20357	8.2
Bufo_raddei	40.1	113.143	1000	2015	2	-6.18214	10.7
Bufo_raddei	40.1	113.143	1000	2016	2	-8.32069	6.7
Bufo_raddei	40.1	113.143	1000	2012	3	0.341935	7.7
Bufo_raddei	40.1	113.143	1000	2013	3	1.99677	2.9
Bufo_raddei	40.1	113.143	1000	2014	3	2.77419	1.9
Bufo_raddei	40.1	113.143	1000	2015	3	1.91613	0
Bufo_raddei	40.1	113.143	1000	2016	3	1.66129	0.8
Bufo_raddei	40.1	113.143	1000	2012	4	11.3333	12.1
Bufo_raddei	40.1	113.143	1000	2013	4	7.43333	12.7
Bufo_raddei	40.1	113.143	1000	2014	4	11.7	21
Bufo_raddei	40.1	113.143	1000	2015	4	9.31667	17.6
Bufo_raddei	40.1	113.143	1000	2016	4	11.3567	16.1
Bufo_raddei	40.1	113.143	1000	2012	5	18.0903	51.6
Bufo_raddei	40.1	113.143	1000	2013	5	18.129	19.3
Bufo_raddei	40.1	113.143	1000	2014	5	16.1548	57.6
Bufo_raddei	40.1	113.143	1000	2015	5	16.0387	32
Bufo_raddei	40.1	113.143	1000	2016	5	15.6645	65.1
Bufo_raddei	40.1	113.143	1000	2012	6	23.2032	82.6
Bufo_raddei	40.1	113.143	1000	2013	6	20.5067	95.4
Bufo_raddei	40.1	113.143	1000	2014	6	19.2267	62.8
Bufo_raddei	40.1	113.143	1000	2015	6	19.0633	38.9
Bufo_raddei	40.1	113.143	1000	2016	6	19.67	51.8
Bufo_raddei	40.1	113.143	1000	2012	7	23.2032	177.4
Bufo_raddei	40.1	113.143	1000	2013	7	21.3774	182
Bufo_raddei	40.1	113.143	1000	2014	7	21.8355	43.9
Bufo_raddei	40.1	113.143	1000	2015	7	21.5613	42.8
Bufo_raddei	40.1	113.143	1000	2016	7	22.2226	73.6
Bufo_raddei	40.1	113.143	1000	2012	8	20.771	73.2
Bufo_raddei	40.1	113.143	1000	2013	8	20.2032	98.2
Bufo_raddei	40.1	113.143	1000	2014	8	18.9581	74.5
Bufo_raddei	40.1	113.143	1000	2015	8	19.9226	63.5
Bufo_raddei	40.1	113.143	1000	2016	8	21.1097	109.1
Bufo_raddei	40.1	113.143	1000	2012	9	13.77	61.5
Bufo_raddei	40.1	113.143	1000	2013	9	14.3167	77.9
Bufo_raddei	40.1	113.143	1000	2014	9	13.86	107.9
Bufo_raddei	40.1	113.143	1000	2015	9	14.23	93.5
Bufo_raddei	40.1	113.143	1000	2016	9	14.4567	58.2
Bufo_raddei	40.1	113.143	1000	2012	10	7.51613	28.2
Bufo_raddei	40.1	113.143	1000	2013	10	6.16774	11
Bufo_raddei	40.1	113.143	1000	2014	10	8.47097	25.4
Bufo_raddei	40.1	113.143	1000	2015	10	7.84516	11.9
Bufo_raddei	40.1	113.143	1000	2016	10	2.15161	66.7
Bufo_raddei	40.1	113.143	1000	2012	11	-3.76667	14.3
Bufo_raddei	40.1	113.143	1000	2013	11	-1.88	1.2
Bufo_raddei	40.1	113.143	1000	2014	11	-1.37667	1.4
Bufo_raddei	40.1	113.143	1000	2015	11	-0.433333	48.2
Bufo_raddei	40.1	113.143	1000	2016	11	-1.23333	8
Bufo_raddei	40.1	113.143	1000	2012	12	-11.0452	3.6
Bufo_raddei	40.1	113.143	1000	2013	12	-8.41935	0
Bufo_raddei	40.1	113.143	1000	2014	12	-9.7129	0
Bufo_raddei	40.1	113.143	1000	2015	12	-7.1871	3.3
Bufo_raddei	40.1	113.143	1000	2016	12	-6.77097	2.3
Bufo_tibetanus	30.05	101.967	2615.7	2012	1	-4.1	0.9
Bufo_tibetanus	30.05	101.967	2615.7	2013	1	-1.60645	4.6
Bufo_tibetanus	30.05	101.967	2615.7	2014	1	-0.532258	5.5
Bufo_tibetanus	30.05	101.967	2615.7	2015	1	0.241935	1.4
Bufo_tibetanus	30.05	101.967	2615.7	2016	1	-2.39032	14.6
Bufo_tibetanus	30.05	101.967	2615.7	2012	2	-1.18621	15.7
Bufo_tibetanus	30.05	101.967	2615.7	2013	2	3.09643	0.2
Bufo_tibetanus	30.05	101.967	2615.7	2014	2	-0.0357143	7.1
Bufo_tibetanus	30.05	101.967	2615.7	2015	2	1.89286	2.6
Bufo_tibetanus	30.05	101.967	2615.7	2016	2	-0.613793	52.2
Bufo_tibetanus	30.05	101.967	2615.7	2012	3	2.7	55.1
Bufo_tibetanus	30.05	101.967	2615.7	2013	3	6.07419	46.8
Bufo_tibetanus	30.05	101.967	2615.7	2014	3	3.95806	27.8
Bufo_tibetanus	30.05	101.967	2615.7	2015	3	5.69355	18.5
Bufo_tibetanus	30.05	101.967	2615.7	2016	3	5.27419	23.4
Bufo_tibetanus	30.05	101.967	2615.7	2012	4	7.95	70.1
Bufo_tibetanus	30.05	101.967	2615.7	2013	4	7.95	82.7
Bufo_tibetanus	30.05	101.967	2615.7	2014	4	9.19667	50.3
Bufo_tibetanus	30.05	101.967	2615.7	2015	4	8.72	60.1
Bufo_tibetanus	30.05	101.967	2615.7	2016	4	8.53333	123.4
Bufo_tibetanus	30.05	101.967	2615.7	2012	5	12.0032	83.5
Bufo_tibetanus	30.05	101.967	2615.7	2013	5	10.9806	102.3
Bufo_tibetanus	30.05	101.967	2615.7	2014	5	10.9968	61.5
Bufo_tibetanus	30.05	101.967	2615.7	2015	5	12.2129	97.4
Bufo_tibetanus	30.05	101.967	2615.7	2016	5	12.4742	78.1
Bufo_tibetanus	30.05	101.967	2615.7	2012	6	15.6226	142.7
Bufo_tibetanus	30.05	101.967	2615.7	2013	6	15.4567	165.5
Bufo_tibetanus	30.05	101.967	2615.7	2014	6	13.2033	233.2
Bufo_tibetanus	30.05	101.967	2615.7	2015	6	14.3767	191.6
Bufo_tibetanus	30.05	101.967	2615.7	2016	6	15.27	169.8
Bufo_tibetanus	30.05	101.967	2615.7	2012	7	15.6226	105.8
Bufo_tibetanus	30.05	101.967	2615.7	2013	7	17.1806	81.4
Bufo_tibetanus	30.05	101.967	2615.7	2014	7	16.0194	150.8
Bufo_tibetanus	30.05	101.967	2615.7	2015	7	14.6516	169.1
Bufo_tibetanus	30.05	101.967	2615.7	2016	7	16.5516	169.1
Bufo_tibetanus	30.05	101.967	2615.7	2012	8	16.3032	76.6
Bufo_tibetanus	30.05	101.967	2615.7	2013	8	17.3613	22.5
Bufo_tibetanus	30.05	101.967	2615.7	2014	8	14.3419	184.4
Bufo_tibetanus	30.05	101.967	2615.7	2015	8	14.3323	199.9
Bufo_tibetanus	30.05	101.967	2615.7	2016	8	17.6065	46.1
Bufo_tibetanus	30.05	101.967	2615.7	2012	9	11.7933	150.9
Bufo_tibetanus	30.05	101.967	2615.7	2013	9	12.0233	249
Bufo_tibetanus	30.05	101.967	2615.7	2014	9	13.5167	127.7
Bufo_tibetanus	30.05	101.967	2615.7	2015	9	12.2167	210.5
Bufo_tibetanus	30.05	101.967	2615.7	2016	9	11.9033	219.3
Bufo_tibetanus	30.05	101.967	2615.7	2012	10	7.92581	55.4
Bufo_tibetanus	30.05	101.967	2615.7	2013	10	7.58065	98.6
Bufo_tibetanus	30.05	101.967	2615.7	2014	10	9.46774	8.4
Bufo_tibetanus	30.05	101.967	2615.7	2015	10	9.60323	31.7
Bufo_tibetanus	30.05	101.967	2615.7	2016	10	10.0387	28.6
Bufo_tibetanus	30.05	101.967	2615.7	2012	11	3.44	2.1
Bufo_tibetanus	30.05	101.967	2615.7	2013	11	4.13333	2.9
Bufo_tibetanus	30.05	101.967	2615.7	2014	11	3.40667	23.2
Bufo_tibetanus	30.05	101.967	2615.7	2015	11	6.21667	0
Bufo_tibetanus	30.05	101.967	2615.7	2016	11	4.37667	11.5
Bufo_tibetanus	30.05	101.967	2615.7	2012	12	-0.174194	0.1
Bufo_tibetanus	30.05	101.967	2615.7	2013	12	-1.57742	5.7
Bufo_tibetanus	30.05	101.967	2615.7	2014	12	-1.27097	0.8
Bufo_tibetanus	30.05	101.967	2615.7	2015	12	-0.648387	10.5
Bufo_tibetanus	30.05	101.967	2615.7	2016	12	1.43226	4.3
Calluella_yunnanensis	24.4667	100.867	1162.3	2012	1	11.7484	12
Calluella_yunnanensis	24.4667	100.867	1162.3	2013	1	11.8742	0
Calluella_yunnanensis	24.4667	100.867	1162.3	2014	1	10.8	2.3
Calluella_yunnanensis	24.4667	100.867	1162.3	2015	1	11.4065	168.1
Calluella_yunnanensis	24.4667	100.867	1162.3	2016	1	10.671	25.4
Calluella_yunnanensis	24.4667	100.867	1162.3	2012	2	14.6414	0
Calluella_yunnanensis	24.4667	100.867	1162.3	2013	2	15.5393	0
Calluella_yunnanensis	24.4667	100.867	1162.3	2014	2	14.7393	13.2
Calluella_yunnanensis	24.4667	100.867	1162.3	2015	2	13.3	4
Calluella_yunnanensis	24.4667	100.867	1162.3	2016	2	14.1276	25.4
Calluella_yunnanensis	24.4667	100.867	1162.3	2012	3	17.1548	39.4
Calluella_yunnanensis	24.4667	100.867	1162.3	2013	3	18.6419	13.1
Calluella_yunnanensis	24.4667	100.867	1162.3	2014	3	17.6258	6
Calluella_yunnanensis	24.4667	100.867	1162.3	2015	3	18.4194	13.3
Calluella_yunnanensis	24.4667	100.867	1162.3	2016	3	18.4161	3.9
Calluella_yunnanensis	24.4667	100.867	1162.3	2012	4	20.2933	12
Calluella_yunnanensis	24.4667	100.867	1162.3	2013	4	21.4167	3.9
Calluella_yunnanensis	24.4667	100.867	1162.3	2014	4	21.84	1.3
Calluella_yunnanensis	24.4667	100.867	1162.3	2015	4	20.1467	43.3
Calluella_yunnanensis	24.4667	100.867	1162.3	2016	4	20.3633	75.9
Calluella_yunnanensis	24.4667	100.867	1162.3	2012	5	24.9839	71.1
Calluella_yunnanensis	24.4667	100.867	1162.3	2013	5	23.5419	40.6
Calluella_yunnanensis	24.4667	100.867	1162.3	2014	5	24.5548	28.3
Calluella_yunnanensis	24.4667	100.867	1162.3	2015	5	24.0742	37.5
Calluella_yunnanensis	24.4667	100.867	1162.3	2016	5	21.8774	132.4
Calluella_yunnanensis	24.4667	100.867	1162.3	2012	6	23.7258	247.4
Calluella_yunnanensis	24.4667	100.867	1162.3	2013	6	25.0933	91.2
Calluella_yunnanensis	24.4667	100.867	1162.3	2014	6	25.6367	145.4
Calluella_yunnanensis	24.4667	100.867	1162.3	2015	6	25.9933	98.6
Calluella_yunnanensis	24.4667	100.867	1162.3	2016	6	23.5067	270.4
Calluella_yunnanensis	24.4667	100.867	1162.3	2012	7	23.7258	174.3
Calluella_yunnanensis	24.4667	100.867	1162.3	2013	7	23.9226	101.5
Calluella_yunnanensis	24.4667	100.867	1162.3	2014	7	24.571	245.8
Calluella_yunnanensis	24.4667	100.867	1162.3	2015	7	23.4452	165.8
Calluella_yunnanensis	24.4667	100.867	1162.3	2016	7	23.6226	305.3
Calluella_yunnanensis	24.4667	100.867	1162.3	2012	8	23.6839	110.4
Calluella_yunnanensis	24.4667	100.867	1162.3	2013	8	23.4	298.1
Calluella_yunnanensis	24.4667	100.867	1162.3	2014	8	23.7484	216.5
Calluella_yunnanensis	24.4667	100.867	1162.3	2015	8	23.1452	170.5
Calluella_yunnanensis	24.4667	100.867	1162.3	2016	8	24.4774	162.7
Calluella_yunnanensis	24.4667	100.867	1162.3	2012	9	22.16	77.6
Calluella_yunnanensis	24.4667	100.867	1162.3	2013	9	22.03	88.3
Calluella_yunnanensis	24.4667	100.867	1162.3	2014	9	23.0867	102.5
Calluella_yunnanensis	24.4667	100.867	1162.3	2015	9	23.3033	132.6
Calluella_yunnanensis	24.4667	100.867	1162.3	2016	9	23.0433	148.8
Calluella_yunnanensis	24.4667	100.867	1162.3	2012	10	19.5581	25.4
Calluella_yunnanensis	24.4667	100.867	1162.3	2013	10	18.8903	243.5
Calluella_yunnanensis	24.4667	100.867	1162.3	2014	10	19.6419	21
Calluella_yunnanensis	24.4667	100.867	1162.3	2015	10	18.9903	172.3
Calluella_yunnanensis	24.4667	100.867	1162.3	2016	10	21.3935	178.3
Calluella_yunnanensis	24.4667	100.867	1162.3	2012	11	16.26	16.1
Calluella_yunnanensis	24.4667	100.867	1162.3	2013	11	15.7067	0.6
Calluella_yunnanensis	24.4667	100.867	1162.3	2014	11	15.7967	24.2
Calluella_yunnanensis	24.4667	100.867	1162.3	2015	11	15.9667	34.6
Calluella_yunnanensis	24.4667	100.867	1162.3	2016	11	16.98	69.5
Calluella_yunnanensis	24.4667	100.867	1162.3	2012	12	12.071	0
Calluella_yunnanensis	24.4667	100.867	1162.3	2013	12	11.1677	30.7
Calluella_yunnanensis	24.4667	100.867	1162.3	2014	12	12.3484	16.2
Calluella_yunnanensis	24.4667	100.867	1162.3	2015	12	12.8387	25.7
Calluella_yunnanensis	24.4667	100.867	1162.3	2016	12	14.2613	4.6
Chirixalus_vittatus	19.0333	109.833	250.9	2012	1	16.9806	36.1
Chirixalus_vittatus	19.0333	109.833	250.9	2013	1	18.0677	28.5
Chirixalus_vittatus	19.0333	109.833	250.9	2014	1	16.7516	2.2
Chirixalus_vittatus	19.0333	109.833	250.9	2015	1	16.9452	24.4
Chirixalus_vittatus	19.0333	109.833	250.9	2016	1	18.5903	103.3
Chirixalus_vittatus	19.0333	109.833	250.9	2012	2	19.2655	27.1
Chirixalus_vittatus	19.0333	109.833	250.9	2013	2	21.3357	34.5
Chirixalus_vittatus	19.0333	109.833	250.9	2014	2	17.8429	13.4
Chirixalus_vittatus	19.0333	109.833	250.9	2015	2	19.9714	11.2
Chirixalus_vittatus	19.0333	109.833	250.9	2016	2	16.2862	19.1
Chirixalus_vittatus	19.0333	109.833	250.9	2012	3	22.1871	18.2
Chirixalus_vittatus	19.0333	109.833	250.9	2013	3	22.9871	78.2
Chirixalus_vittatus	19.0333	109.833	250.9	2014	3	22.6387	29.5
Chirixalus_vittatus	19.0333	109.833	250.9	2015	3	23.1774	37.1
Chirixalus_vittatus	19.0333	109.833	250.9	2016	3	21.3065	23.3
Chirixalus_vittatus	19.0333	109.833	250.9	2012	4	26.2767	203.5
Chirixalus_vittatus	19.0333	109.833	250.9	2013	4	24.8033	63.4
Chirixalus_vittatus	19.0333	109.833	250.9	2014	4	25.4367	158.9
Chirixalus_vittatus	19.0333	109.833	250.9	2015	4	24.1633	136.7
Chirixalus_vittatus	19.0333	109.833	250.9	2016	4	26.58	35.5
Chirixalus_vittatus	19.0333	109.833	250.9	2012	5	27.2484	341.5
Chirixalus_vittatus	19.0333	109.833	250.9	2013	5	27.2839	189.6
Chirixalus_vittatus	19.0333	109.833	250.9	2014	5	28.0871	230.3
Chirixalus_vittatus	19.0333	109.833	250.9	2015	5	28.5516	75.5
Chirixalus_vittatus	19.0333	109.833	250.9	2016	5	27.4742	162.2
Chirixalus_vittatus	19.0333	109.833	250.9	2012	6	27.61	334.3
Chirixalus_vittatus	19.0333	109.833	250.9	2013	6	27.21	118.5
Chirixalus_vittatus	19.0333	109.833	250.9	2014	6	28.22	257.6
Chirixalus_vittatus	19.0333	109.833	250.9	2015	6	28.5467	167.7
Chirixalus_vittatus	19.0333	109.833	250.9	2016	6	28.1933	57.6
Chirixalus_vittatus	19.0333	109.833	250.9	2012	7	27.1581	141.2
Chirixalus_vittatus	19.0333	109.833	250.9	2013	7	26.6	275.5
Chirixalus_vittatus	19.0333	109.833	250.9	2014	7	27.3935	393.8
Chirixalus_vittatus	19.0333	109.833	250.9	2015	7	27.1645	149
Chirixalus_vittatus	19.0333	109.833	250.9	2016	7	28.1548	162.1
Chirixalus_vittatus	19.0333	109.833	250.9	2012	8	26.7548	199.9
Chirixalus_vittatus	19.0333	109.833	250.9	2013	8	26.871	298.7
Chirixalus_vittatus	19.0333	109.833	250.9	2014	8	27.1452	220.8
Chirixalus_vittatus	19.0333	109.833	250.9	2015	8	27.7419	44
Chirixalus_vittatus	19.0333	109.833	250.9	2016	8	27.1742	527.2
Chirixalus_vittatus	19.0333	109.833	250.9	2012	9	25.9167	157.8
Chirixalus_vittatus	19.0333	109.833	250.9	2013	9	25.4233	546.9
Chirixalus_vittatus	19.0333	109.833	250.9	2014	9	26.5367	301.7
Chirixalus_vittatus	19.0333	109.833	250.9	2015	9	27.11	281.4
Chirixalus_vittatus	19.0333	109.833	250.9	2016	9	26.5	313.5
Chirixalus_vittatus	19.0333	109.833	250.9	2012	10	24.2065	319.1
Chirixalus_vittatus	19.0333	109.833	250.9	2013	10	23.4645	387.2
Chirixalus_vittatus	19.0333	109.833	250.9	2014	10	24.2613	431.1
Chirixalus_vittatus	19.0333	109.833	250.9	2015	10	24.0613	205.2
Chirixalus_vittatus	19.0333	109.833	250.9	2016	10	25.1387	898.5
Chirixalus_vittatus	19.0333	109.833	250.9	2012	11	23.0767	171.2
Chirixalus_vittatus	19.0333	109.833	250.9	2013	11	21.5433	483
Chirixalus_vittatus	19.0333	109.833	250.9	2014	11	22.8133	77.6
Chirixalus_vittatus	19.0333	109.833	250.9	2015	11	23.6567	214.8
Chirixalus_vittatus	19.0333	109.833	250.9	2016	11	21.9533	151
Chirixalus_vittatus	19.0333	109.833	250.9	2012	12	19.9839	132.1
Chirixalus_vittatus	19.0333	109.833	250.9	2013	12	15.8226	95.4
Chirixalus_vittatus	19.0333	109.833	250.9	2014	12	17.0258	111.2
Chirixalus_vittatus	19.0333	109.833	250.9	2015	12	19.5871	65
Chirixalus_vittatus	19.0333	109.833	250.9	2016	12	19.3742	51.6
Chirixalus_doriae	21.4667	101.567	633.4	2012	1	16.7129	30.4
Chirixalus_doriae	21.4667	101.567	633.4	2013	1	17.6032	46.3
Chirixalus_doriae	21.4667	101.567	633.4	2014	1	15.3903	6
Chirixalus_doriae	21.4667	101.567	633.4	2015	1	14.5682	73.3
Chirixalus_doriae	21.4667	101.567	633.4	2016	1	14.8613	46.7
Chirixalus_doriae	21.4667	101.567	633.4	2012	2	18.5724	0
Chirixalus_doriae	21.4667	101.567	633.4	2013	2	20.3	20.3
Chirixalus_doriae	21.4667	101.567	633.4	2014	2	17.6607	0
Chirixalus_doriae	21.4667	101.567	633.4	2015	2	17.525	11.9
Chirixalus_doriae	21.4667	101.567	633.4	2016	2	16.4483	56.4
Chirixalus_doriae	21.4667	101.567	633.4	2012	3	20.3258	34.4
Chirixalus_doriae	21.4667	101.567	633.4	2013	3	20.5161	45.9
Chirixalus_doriae	21.4667	101.567	633.4	2014	3	20.4355	106.3
Chirixalus_doriae	21.4667	101.567	633.4	2015	3	21.1161	23.8
Chirixalus_doriae	21.4667	101.567	633.4	2016	3	21.2323	1.4
Chirixalus_doriae	21.4667	101.567	633.4	2012	4	23.9133	79
Chirixalus_doriae	21.4667	101.567	633.4	2013	4	23.9567	88.5
Chirixalus_doriae	21.4667	101.567	633.4	2014	4	23.94	76.2
Chirixalus_doriae	21.4667	101.567	633.4	2015	4	22.8533	174
Chirixalus_doriae	21.4667	101.567	633.4	2016	4	24.11	38.8
Chirixalus_doriae	21.4667	101.567	633.4	2012	5	25.3032	198.7
Chirixalus_doriae	21.4667	101.567	633.4	2013	5	25.1	178
Chirixalus_doriae	21.4667	101.567	633.4	2014	5	25.4645	102.5
Chirixalus_doriae	21.4667	101.567	633.4	2015	5	25.9516	47.5
Chirixalus_doriae	21.4667	101.567	633.4	2016	5	25.3516	206
Chirixalus_doriae	21.4667	101.567	633.4	2012	6	26	151.1
Chirixalus_doriae	21.4667	101.567	633.4	2013	6	25.1333	250.4
Chirixalus_doriae	21.4667	101.567	633.4	2014	6	26.0067	168.8
Chirixalus_doriae	21.4667	101.567	633.4	2015	6	25.7967	151.1
Chirixalus_doriae	21.4667	101.567	633.4	2016	6	25.55	187.7
Chirixalus_doriae	21.4667	101.567	633.4	2012	7	24.7871	555.9
Chirixalus_doriae	21.4667	101.567	633.4	2013	7	24.8742	347.6
Chirixalus_doriae	21.4667	101.567	633.4	2014	7	25.2839	198.8
Chirixalus_doriae	21.4667	101.567	633.4	2015	7	25.2097	274.2
Chirixalus_doriae	21.4667	101.567	633.4	2016	7	25.1194	193.3
Chirixalus_doriae	21.4667	101.567	633.4	2012	8	25.0839	282.8
Chirixalus_doriae	21.4667	101.567	633.4	2013	8	24.8032	309.9
Chirixalus_doriae	21.4667	101.567	633.4	2014	8	24.8742	332.5
Chirixalus_doriae	21.4667	101.567	633.4	2015	8	24.9806	356.4
Chirixalus_doriae	21.4667	101.567	633.4	2016	8	25.4677	430
Chirixalus_doriae	21.4667	101.567	633.4	2012	9	24.42	161.2
Chirixalus_doriae	21.4667	101.567	633.4	2013	9	24.28	168.5
Chirixalus_doriae	21.4667	101.567	633.4	2014	9	25.01	155.9
Chirixalus_doriae	21.4667	101.567	633.4	2015	9	24.91	211.3
Chirixalus_doriae	21.4667	101.567	633.4	2016	9	24.5567	170.6
Chirixalus_doriae	21.4667	101.567	633.4	2012	10	23.0387	39
Chirixalus_doriae	21.4667	101.567	633.4	2013	10	21.6839	80.1
Chirixalus_doriae	21.4667	101.567	633.4	2014	10	22.6774	56.1
Chirixalus_doriae	21.4667	101.567	633.4	2015	10	22.7355	38.7
Chirixalus_doriae	21.4667	101.567	633.4	2016	10	23.7968	66.1
Chirixalus_doriae	21.4667	101.567	633.4	2012	11	21.8967	57.8
Chirixalus_doriae	21.4667	101.567	633.4	2013	11	20.21	32.2
Chirixalus_doriae	21.4667	101.567	633.4	2014	11	20.67	79.8
Chirixalus_doriae	21.4667	101.567	633.4	2015	11	20.82	62
Chirixalus_doriae	21.4667	101.567	633.4	2016	11	20.89	87
Chirixalus_doriae	21.4667	101.567	633.4	2012	12	18.4968	37
Chirixalus_doriae	21.4667	101.567	633.4	2013	12	14.9645	191
Chirixalus_doriae	21.4667	101.567	633.4	2014	12	16.9419	0
Chirixalus_doriae	21.4667	101.567	633.4	2015	12	17.4387	42.1
Chirixalus_doriae	21.4667	101.567	633.4	2016	12	17.4419	2.5
Feirana_quadranus	32.8333	106.25	836.1	2012	1	1.19677	10.9
Feirana_quadranus	32.8333	106.25	836.1	2013	1	1.82903	4.6
Feirana_quadranus	32.8333	106.25	836.1	2014	1	2.71613	5.3
Feirana_quadranus	32.8333	106.25	836.1	2015	1	2.80645	17.6
Feirana_quadranus	32.8333	106.25	836.1	2016	1	1.72258	9.1
Feirana_quadranus	32.8333	106.25	836.1	2012	2	2.45517	16.7
Feirana_quadranus	32.8333	106.25	836.1	2013	2	5.35357	14.6
Feirana_quadranus	32.8333	106.25	836.1	2014	2	2.59286	16
Feirana_quadranus	32.8333	106.25	836.1	2015	2	4.50357	17.1
Feirana_quadranus	32.8333	106.25	836.1	2016	2	3.7	14
Feirana_quadranus	32.8333	106.25	836.1	2012	3	7.98387	22.6
Feirana_quadranus	32.8333	106.25	836.1	2013	3	12.5226	16.9
Feirana_quadranus	32.8333	106.25	836.1	2014	3	8.67419	17.8
Feirana_quadranus	32.8333	106.25	836.1	2015	3	9.57419	37.8
Feirana_quadranus	32.8333	106.25	836.1	2016	3	9.94194	23.6
Feirana_quadranus	32.8333	106.25	836.1	2012	4	15.58	25.8
Feirana_quadranus	32.8333	106.25	836.1	2013	4	14.6967	117.3
Feirana_quadranus	32.8333	106.25	836.1	2014	4	14.3033	124
Feirana_quadranus	32.8333	106.25	836.1	2015	4	14.37	111.6
Feirana_quadranus	32.8333	106.25	836.1	2016	4	14.5167	80.4
Feirana_quadranus	32.8333	106.25	836.1	2012	5	17.8161	169.1
Feirana_quadranus	32.8333	106.25	836.1	2013	5	18.1516	249
Feirana_quadranus	32.8333	106.25	836.1	2014	5	16.8097	91.1
Feirana_quadranus	32.8333	106.25	836.1	2015	5	18.171	95.1
Feirana_quadranus	32.8333	106.25	836.1	2016	5	16.8258	168.2
Feirana_quadranus	32.8333	106.25	836.1	2012	6	23.1968	98.1
Feirana_quadranus	32.8333	106.25	836.1	2013	6	21.7067	204.5
Feirana_quadranus	32.8333	106.25	836.1	2014	6	21.2933	119.4
Feirana_quadranus	32.8333	106.25	836.1	2015	6	21.0667	275.9
Feirana_quadranus	32.8333	106.25	836.1	2016	6	22.9367	64.1
Feirana_quadranus	32.8333	106.25	836.1	2012	7	23.1968	388.6
Feirana_quadranus	32.8333	106.25	836.1	2013	7	23.5129	410.6
Feirana_quadranus	32.8333	106.25	836.1	2014	7	24.0516	88.9
Feirana_quadranus	32.8333	106.25	836.1	2015	7	23.029	120.8
Feirana_quadranus	32.8333	106.25	836.1	2016	7	23.8161	172.3
Feirana_quadranus	32.8333	106.25	836.1	2012	8	23.171	197.4
Feirana_quadranus	32.8333	106.25	836.1	2013	8	24.3903	142.1
Feirana_quadranus	32.8333	106.25	836.1	2014	8	22.1452	151.5
Feirana_quadranus	32.8333	106.25	836.1	2015	8	22.0484	127.2
Feirana_quadranus	32.8333	106.25	836.1	2016	8	24.371	84.8
Feirana_quadranus	32.8333	106.25	836.1	2012	9	17.7267	120.6
Feirana_quadranus	32.8333	106.25	836.1	2013	9	18.54	136.6
Feirana_quadranus	32.8333	106.25	836.1	2014	9	18.5467	243.7
Feirana_quadranus	32.8333	106.25	836.1	2015	9	18.2667	225.2
Feirana_quadranus	32.8333	106.25	836.1	2016	9	19.2033	84.3
Feirana_quadranus	32.8333	106.25	836.1	2012	10	13.629	46.4
Feirana_quadranus	32.8333	106.25	836.1	2013	10	14.8871	38.6
Feirana_quadranus	32.8333	106.25	836.1	2014	10	14.4097	141.9
Feirana_quadranus	32.8333	106.25	836.1	2015	10	13.8097	64
Feirana_quadranus	32.8333	106.25	836.1	2016	10	13.4258	65.8
Feirana_quadranus	32.8333	106.25	836.1	2012	11	6.90667	29.6
Feirana_quadranus	32.8333	106.25	836.1	2013	11	7.71667	32.6
Feirana_quadranus	32.8333	106.25	836.1	2014	11	8.09667	41.2
Feirana_quadranus	32.8333	106.25	836.1	2015	11	9.01	53.4
Feirana_quadranus	32.8333	106.25	836.1	2016	11	7.97333	33.1
Feirana_quadranus	32.8333	106.25	836.1	2012	12	2.45484	9
Feirana_quadranus	32.8333	106.25	836.1	2013	12	2.64516	3.6
Feirana_quadranus	32.8333	106.25	836.1	2014	12	2.03548	4.5
Feirana_quadranus	32.8333	106.25	836.1	2015	12	3.43226	9.7
Feirana_quadranus	32.8333	106.25	836.1	2016	12	4.18065	5
Fejervarya_multistriata	28.8	104.6	340.8	2012	1	6.7	44.3
Fejervarya_multistriata	28.8	104.6	340.8	2013	1	8.52258	5.9
Fejervarya_multistriata	28.8	104.6	340.8	2014	1	8.66129	4.2
Fejervarya_multistriata	28.8	104.6	340.8	2015	1	9.80968	22.7
Fejervarya_multistriata	28.8	104.6	340.8	2016	1	8.1	20.6
Fejervarya_multistriata	28.8	104.6	340.8	2012	2	8.15517	35.6
Fejervarya_multistriata	28.8	104.6	340.8	2013	2	12.1571	14.9
Fejervarya_multistriata	28.8	104.6	340.8	2014	2	9.15714	25.9
Fejervarya_multistriata	28.8	104.6	340.8	2015	2	11.8393	21.7
Fejervarya_multistriata	28.8	104.6	340.8	2016	2	9.94483	16.2
Fejervarya_multistriata	28.8	104.6	340.8	2012	3	14.129	17.2
Fejervarya_multistriata	28.8	104.6	340.8	2013	3	18.8258	15.3
Fejervarya_multistriata	28.8	104.6	340.8	2014	3	14.7097	75
Fejervarya_multistriata	28.8	104.6	340.8	2015	3	16.3968	30.7
Fejervarya_multistriata	28.8	104.6	340.8	2016	3	15.8419	51.8
Fejervarya_multistriata	28.8	104.6	340.8	2012	4	20.44	35
Fejervarya_multistriata	28.8	104.6	340.8	2013	4	20.24	95.3
Fejervarya_multistriata	28.8	104.6	340.8	2014	4	20.2467	62.8
Fejervarya_multistriata	28.8	104.6	340.8	2015	4	20.3933	73.4
Fejervarya_multistriata	28.8	104.6	340.8	2016	4	19.7467	106.8
Fejervarya_multistriata	28.8	104.6	340.8	2012	5	23.1	129.6
Fejervarya_multistriata	28.8	104.6	340.8	2013	5	23.1387	75.6
Fejervarya_multistriata	28.8	104.6	340.8	2014	5	21.829	73.5
Fejervarya_multistriata	28.8	104.6	340.8	2015	5	23.7484	64.1
Fejervarya_multistriata	28.8	104.6	340.8	2016	5	23.0161	89.3
Fejervarya_multistriata	28.8	104.6	340.8	2012	6	26.5065	169.1
Fejervarya_multistriata	28.8	104.6	340.8	2013	6	27.0367	148.9
Fejervarya_multistriata	28.8	104.6	340.8	2014	6	24.0133	85.5
Fejervarya_multistriata	28.8	104.6	340.8	2015	6	25.93	87
Fejervarya_multistriata	28.8	104.6	340.8	2016	6	26.1033	412.8
Fejervarya_multistriata	28.8	104.6	340.8	2012	7	26.5065	255.4
Fejervarya_multistriata	28.8	104.6	340.8	2013	7	28.3194	280.9
Fejervarya_multistriata	28.8	104.6	340.8	2014	7	27.7677	77.3
Fejervarya_multistriata	28.8	104.6	340.8	2015	7	27.1677	87
Fejervarya_multistriata	28.8	104.6	340.8	2016	7	28.3903	177.1
Fejervarya_multistriata	28.8	104.6	340.8	2012	8	27.7419	192.5
Fejervarya_multistriata	28.8	104.6	340.8	2013	8	28.0548	320.2
Fejervarya_multistriata	28.8	104.6	340.8	2014	8	25.9323	234.3
Fejervarya_multistriata	28.8	104.6	340.8	2015	8	26.4484	213
Fejervarya_multistriata	28.8	104.6	340.8	2016	8	28.7839	265.8
Fejervarya_multistriata	28.8	104.6	340.8	2012	9	22.3167	287.5
Fejervarya_multistriata	28.8	104.6	340.8	2013	9	22.67	155.5
Fejervarya_multistriata	28.8	104.6	340.8	2014	9	23.44	173.1
Fejervarya_multistriata	28.8	104.6	340.8	2015	9	22.63	118.2
Fejervarya_multistriata	28.8	104.6	340.8	2016	9	22.65	250.9
Fejervarya_multistriata	28.8	104.6	340.8	2012	10	18.8355	75.8
Fejervarya_multistriata	28.8	104.6	340.8	2013	10	19.4903	84.6
Fejervarya_multistriata	28.8	104.6	340.8	2014	10	19.5484	93.2
Fejervarya_multistriata	28.8	104.6	340.8	2015	10	20.2	111.3
Fejervarya_multistriata	28.8	104.6	340.8	2016	10	19.8484	30.6
Fejervarya_multistriata	28.8	104.6	340.8	2012	11	13.05	12.2
Fejervarya_multistriata	28.8	104.6	340.8	2013	11	14.2067	21.7
Fejervarya_multistriata	28.8	104.6	340.8	2014	11	14.0533	22.3
Fejervarya_multistriata	28.8	104.6	340.8	2015	11	16.0633	19.9
Fejervarya_multistriata	28.8	104.6	340.8	2016	11	14.15	37.4
Fejervarya_multistriata	28.8	104.6	340.8	2012	12	9.13226	24.6
Fejervarya_multistriata	28.8	104.6	340.8	2013	12	8.95161	17.4
Fejervarya_multistriata	28.8	104.6	340.8	2014	12	8.99355	11.5
Fejervarya_multistriata	28.8	104.6	340.8	2015	12	10.1968	17.3
Fejervarya_multistriata	28.8	104.6	340.8	2016	12	11.3129	23.2
Hyla_annectans_chuanxiensis	30.75	103.867	547.7	2012	1	5.03871	13.6
Hyla_annectans_chuanxiensis	30.75	103.867	547.7	2013	1	5.32581	1.2
Hyla_annectans_chuanxiensis	30.75	103.867	547.7	2014	1	6.04194	1.1
Hyla_annectans_chuanxiensis	30.75	103.867	547.7	2015	1	6.82258	3.1
Hyla_annectans_chuanxiensis	30.75	103.867	547.7	2016	1	5.66452	11.4
Hyla_annectans_chuanxiensis	30.75	103.867	547.7	2012	2	6.04483	6.3
Hyla_annectans_chuanxiensis	30.75	103.867	547.7	2013	2	9.34286	4.7
Hyla_annectans_chuanxiensis	30.75	103.867	547.7	2014	2	6.72143	8.7
Hyla_annectans_chuanxiensis	30.75	103.867	547.7	2015	2	8.63214	2.8
Hyla_annectans_chuanxiensis	30.75	103.867	547.7	2016	2	7.33793	25
Hyla_annectans_chuanxiensis	30.75	103.867	547.7	2012	3	11.2161	26.2
Hyla_annectans_chuanxiensis	30.75	103.867	547.7	2013	3	15.6677	7.6
Hyla_annectans_chuanxiensis	30.75	103.867	547.7	2014	3	11.8645	13
Hyla_annectans_chuanxiensis	30.75	103.867	547.7	2015	3	13.2645	8.1
Hyla_annectans_chuanxiensis	30.75	103.867	547.7	2016	3	13.1452	33.9
Hyla_annectans_chuanxiensis	30.75	103.867	547.7	2012	4	17.6733	17.6
Hyla_annectans_chuanxiensis	30.75	103.867	547.7	2013	4	17.7033	42.2
Hyla_annectans_chuanxiensis	30.75	103.867	547.7	2014	4	17.8533	46.2
Hyla_annectans_chuanxiensis	30.75	103.867	547.7	2015	4	17.5867	87.4
Hyla_annectans_chuanxiensis	30.75	103.867	547.7	2016	4	17.63	59.2
Hyla_annectans_chuanxiensis	30.75	103.867	547.7	2012	5	21.1806	118.8
Hyla_annectans_chuanxiensis	30.75	103.867	547.7	2013	5	21.1774	99
Hyla_annectans_chuanxiensis	30.75	103.867	547.7	2014	5	20.4355	51.9
Hyla_annectans_chuanxiensis	30.75	103.867	547.7	2015	5	21.9581	51.8
Hyla_annectans_chuanxiensis	30.75	103.867	547.7	2016	5	20.7516	89.3
Hyla_annectans_chuanxiensis	30.75	103.867	547.7	2012	6	22.4867	74.9
Hyla_annectans_chuanxiensis	30.75	103.867	547.7	2013	6	24.5367	182.1
Hyla_annectans_chuanxiensis	30.75	103.867	547.7	2014	6	22.8933	132.2
Hyla_annectans_chuanxiensis	30.75	103.867	547.7	2015	6	23.8733	90.8
Hyla_annectans_chuanxiensis	30.75	103.867	547.7	2016	6	24.6567	80.3
Hyla_annectans_chuanxiensis	30.75	103.867	547.7	2012	7	24.8387	143.1
Hyla_annectans_chuanxiensis	30.75	103.867	547.7	2013	7	25.8032	525.5
Hyla_annectans_chuanxiensis	30.75	103.867	547.7	2014	7	25.329	389.5
Hyla_annectans_chuanxiensis	30.75	103.867	547.7	2015	7	25.1	92.2
Hyla_annectans_chuanxiensis	30.75	103.867	547.7	2016	7	25.9226	349.9
Hyla_annectans_chuanxiensis	30.75	103.867	547.7	2012	8	25.9935	64.1
Hyla_annectans_chuanxiensis	30.75	103.867	547.7	2013	8	26.4935	228.3
Hyla_annectans_chuanxiensis	30.75	103.867	547.7	2014	8	24.0452	180.8
Hyla_annectans_chuanxiensis	30.75	103.867	547.7	2015	8	23.8516	291.9
Hyla_annectans_chuanxiensis	30.75	103.867	547.7	2016	8	26.5032	173
Hyla_annectans_chuanxiensis	30.75	103.867	547.7	2012	9	20.8867	76.7
Hyla_annectans_chuanxiensis	30.75	103.867	547.7	2013	9	20.77	196.2
Hyla_annectans_chuanxiensis	30.75	103.867	547.7	2014	9	21.5967	51.6
Hyla_annectans_chuanxiensis	30.75	103.867	547.7	2015	9	21.0967	205.7
Hyla_annectans_chuanxiensis	30.75	103.867	547.7	2016	9	21.5133	126.3
Hyla_annectans_chuanxiensis	30.75	103.867	547.7	2012	10	17.2	57
Hyla_annectans_chuanxiensis	30.75	103.867	547.7	2013	10	17.6323	27.1
Hyla_annectans_chuanxiensis	30.75	103.867	547.7	2014	10	17.6742	77.8
Hyla_annectans_chuanxiensis	30.75	103.867	547.7	2015	10	18.2452	23
Hyla_annectans_chuanxiensis	30.75	103.867	547.7	2016	10	17.8806	13.6
Hyla_annectans_chuanxiensis	30.75	103.867	547.7	2012	11	11.0033	9.7
Hyla_annectans_chuanxiensis	30.75	103.867	547.7	2013	11	12.02	21.8
Hyla_annectans_chuanxiensis	30.75	103.867	547.7	2014	11	11.7567	16.5
Hyla_annectans_chuanxiensis	30.75	103.867	547.7	2015	11	13.5133	9.8
Hyla_annectans_chuanxiensis	30.75	103.867	547.7	2016	11	11.9167	20.7
Hyla_annectans_chuanxiensis	30.75	103.867	547.7	2012	12	6.75484	2.9
Hyla_annectans_chuanxiensis	30.75	103.867	547.7	2013	12	6.0129	7.6
Hyla_annectans_chuanxiensis	30.75	103.867	547.7	2014	12	5.82581	5.7
Hyla_annectans_chuanxiensis	30.75	103.867	547.7	2015	12	7.35806	13.6
Hyla_annectans_chuanxiensis	30.75	103.867	547.7	2016	12	8.49032	1.3
Hyla_annectans_jingdongensis	22.9833	103.683	1414.1	2012	1	8.57097	66.8
Hyla_annectans_jingdongensis	22.9833	103.683	1414.1	2013	1	8.69677	31.3
Hyla_annectans_jingdongensis	22.9833	103.683	1414.1	2014	1	8.99677	14
Hyla_annectans_jingdongensis	22.9833	103.683	1414.1	2015	1	9.72258	73.7
Hyla_annectans_jingdongensis	22.9833	103.683	1414.1	2016	1	9.97742	44.8
Hyla_annectans_jingdongensis	22.9833	103.683	1414.1	2012	2	11.2931	5.1
Hyla_annectans_jingdongensis	22.9833	103.683	1414.1	2013	2	13.8536	29
Hyla_annectans_jingdongensis	22.9833	103.683	1414.1	2014	2	10.95	29.9
Hyla_annectans_jingdongensis	22.9833	103.683	1414.1	2015	2	11.9214	41.6
Hyla_annectans_jingdongensis	22.9833	103.683	1414.1	2016	2	9.08621	35.5
Hyla_annectans_jingdongensis	22.9833	103.683	1414.1	2012	3	14.3774	9.8
Hyla_annectans_jingdongensis	22.9833	103.683	1414.1	2013	3	16.4387	61.2
Hyla_annectans_jingdongensis	22.9833	103.683	1414.1	2014	3	15.4516	33.3
Hyla_annectans_jingdongensis	22.9833	103.683	1414.1	2015	3	16.8097	23.6
Hyla_annectans_jingdongensis	22.9833	103.683	1414.1	2016	3	14.7161	21.8
Hyla_annectans_jingdongensis	22.9833	103.683	1414.1	2012	4	19.93	43
Hyla_annectans_jingdongensis	22.9833	103.683	1414.1	2013	4	17.84	77.8
Hyla_annectans_jingdongensis	22.9833	103.683	1414.1	2014	4	19.3933	29
Hyla_annectans_jingdongensis	22.9833	103.683	1414.1	2015	4	18.4067	84.7
Hyla_annectans_jingdongensis	22.9833	103.683	1414.1	2016	4	20.0433	162.5
Hyla_annectans_jingdongensis	22.9833	103.683	1414.1	2012	5	21.5742	104.3
Hyla_annectans_jingdongensis	22.9833	103.683	1414.1	2013	5	20.8645	185.4
Hyla_annectans_jingdongensis	22.9833	103.683	1414.1	2014	5	22.1516	28.8
Hyla_annectans_jingdongensis	22.9833	103.683	1414.1	2015	5	22.6097	93.2
Hyla_annectans_jingdongensis	22.9833	103.683	1414.1	2016	5	21.0677	157.3
Hyla_annectans_jingdongensis	22.9833	103.683	1414.1	2012	6	21.2742	192.2
Hyla_annectans_jingdongensis	22.9833	103.683	1414.1	2013	6	21.61	152.4
Hyla_annectans_jingdongensis	22.9833	103.683	1414.1	2014	6	22.21	238.1
Hyla_annectans_jingdongensis	22.9833	103.683	1414.1	2015	6	22.6733	234.4
Hyla_annectans_jingdongensis	22.9833	103.683	1414.1	2016	6	21.8967	142.8
Hyla_annectans_jingdongensis	22.9833	103.683	1414.1	2012	7	21.2742	459.2
Hyla_annectans_jingdongensis	22.9833	103.683	1414.1	2013	7	20.929	331.1
Hyla_annectans_jingdongensis	22.9833	103.683	1414.1	2014	7	21.5871	596.3
Hyla_annectans_jingdongensis	22.9833	103.683	1414.1	2015	7	21.8032	90.8
Hyla_annectans_jingdongensis	22.9833	103.683	1414.1	2016	7	21.9774	204.9
Hyla_annectans_jingdongensis	22.9833	103.683	1414.1	2012	8	21.5806	234.4
Hyla_annectans_jingdongensis	22.9833	103.683	1414.1	2013	8	20.8806	387.1
Hyla_annectans_jingdongensis	22.9833	103.683	1414.1	2014	8	21.1968	215.1
Hyla_annectans_jingdongensis	22.9833	103.683	1414.1	2015	8	21.2097	333.8
Hyla_annectans_jingdongensis	22.9833	103.683	1414.1	2016	8	21.8	278
Hyla_annectans_jingdongensis	22.9833	103.683	1414.1	2012	9	19.4067	138
Hyla_annectans_jingdongensis	22.9833	103.683	1414.1	2013	9	19.4967	146.4
Hyla_annectans_jingdongensis	22.9833	103.683	1414.1	2014	9	20.6367	221.1
Hyla_annectans_jingdongensis	22.9833	103.683	1414.1	2015	9	20.7667	251.5
Hyla_annectans_jingdongensis	22.9833	103.683	1414.1	2016	9	20.31	224.6
Hyla_annectans_jingdongensis	22.9833	103.683	1414.1	2012	10	17.9613	25.2
Hyla_annectans_jingdongensis	22.9833	103.683	1414.1	2013	10	16.2323	66
Hyla_annectans_jingdongensis	22.9833	103.683	1414.1	2014	10	17.5387	131.9
Hyla_annectans_jingdongensis	22.9833	103.683	1414.1	2015	10	17.9645	131.6
Hyla_annectans_jingdongensis	22.9833	103.683	1414.1	2016	10	19.0387	21.2
Hyla_annectans_jingdongensis	22.9833	103.683	1414.1	2012	11	15.4733	74.7
Hyla_annectans_jingdongensis	22.9833	103.683	1414.1	2013	11	14.1767	9.6
Hyla_annectans_jingdongensis	22.9833	103.683	1414.1	2014	11	14.3867	85
Hyla_annectans_jingdongensis	22.9833	103.683	1414.1	2015	11	15.57	105.2
Hyla_annectans_jingdongensis	22.9833	103.683	1414.1	2016	11	14.8033	110.3
Hyla_annectans_jingdongensis	22.9833	103.683	1414.1	2012	12	11.5613	35
Hyla_annectans_jingdongensis	22.9833	103.683	1414.1	2013	12	7.92581	129.4
Hyla_annectans_jingdongensis	22.9833	103.683	1414.1	2014	12	9.09677	11.7
Hyla_annectans_jingdongensis	22.9833	103.683	1414.1	2015	12	10.7484	102.1
Hyla_annectans_jingdongensis	22.9833	103.683	1414.1	2016	12	11.8742	5.7
Hyla_annectans_wulingensis	27.95	108.25	416.8	2012	1	4.66129	19.5
Hyla_annectans_wulingensis	27.95	108.25	416.8	2013	1	6.7129	12
Hyla_annectans_wulingensis	27.95	108.25	416.8	2014	1	8.84516	7
Hyla_annectans_wulingensis	27.95	108.25	416.8	2015	1	9.30968	11
Hyla_annectans_wulingensis	27.95	108.25	416.8	2016	1	6.87097	35.4
Hyla_annectans_wulingensis	27.95	108.25	416.8	2012	2	5.7	15.8
Hyla_annectans_wulingensis	27.95	108.25	416.8	2013	2	10.0286	24.4
Hyla_annectans_wulingensis	27.95	108.25	416.8	2014	2	6.85357	20.1
Hyla_annectans_wulingensis	27.95	108.25	416.8	2015	2	9.775	44.8
Hyla_annectans_wulingensis	27.95	108.25	416.8	2016	2	9.48276	10.9
Hyla_annectans_wulingensis	27.95	108.25	416.8	2012	3	11.1	52.2
Hyla_annectans_wulingensis	27.95	108.25	416.8	2013	3	15.3548	69.3
Hyla_annectans_wulingensis	27.95	108.25	416.8	2014	3	13.329	57.6
Hyla_annectans_wulingensis	27.95	108.25	416.8	2015	3	13.7613	32
Hyla_annectans_wulingensis	27.95	108.25	416.8	2016	3	13.4355	149.3
Hyla_annectans_wulingensis	27.95	108.25	416.8	2012	4	18.8067	90.8
Hyla_annectans_wulingensis	27.95	108.25	416.8	2013	4	17.21	119.7
Hyla_annectans_wulingensis	27.95	108.25	416.8	2014	4	18.1	132.5
Hyla_annectans_wulingensis	27.95	108.25	416.8	2015	4	19.0067	42.4
Hyla_annectans_wulingensis	27.95	108.25	416.8	2016	4	18.4367	139.6
Hyla_annectans_wulingensis	27.95	108.25	416.8	2012	5	21.6323	188.6
Hyla_annectans_wulingensis	27.95	108.25	416.8	2013	5	22.0677	149.5
Hyla_annectans_wulingensis	27.95	108.25	416.8	2014	5	20.4258	209.4
Hyla_annectans_wulingensis	27.95	108.25	416.8	2015	5	22.4	211
Hyla_annectans_wulingensis	27.95	108.25	416.8	2016	5	21.3839	231.1
Hyla_annectans_wulingensis	27.95	108.25	416.8	2012	6	27.8613	120.5
Hyla_annectans_wulingensis	27.95	108.25	416.8	2013	6	26.3833	65.1
Hyla_annectans_wulingensis	27.95	108.25	416.8	2014	6	24.07	187.8
Hyla_annectans_wulingensis	27.95	108.25	416.8	2015	6	25.5133	225.4
Hyla_annectans_wulingensis	27.95	108.25	416.8	2016	6	25.8067	174
Hyla_annectans_wulingensis	27.95	108.25	416.8	2012	7	27.8613	244.3
Hyla_annectans_wulingensis	27.95	108.25	416.8	2013	7	30.2258	25.1
Hyla_annectans_wulingensis	27.95	108.25	416.8	2014	7	26.9968	499.4
Hyla_annectans_wulingensis	27.95	108.25	416.8	2015	7	26.1645	63.9
Hyla_annectans_wulingensis	27.95	108.25	416.8	2016	7	28.7387	155.4
Hyla_annectans_wulingensis	27.95	108.25	416.8	2012	8	27.1387	83.1
Hyla_annectans_wulingensis	27.95	108.25	416.8	2013	8	29.0839	59.5
Hyla_annectans_wulingensis	27.95	108.25	416.8	2014	8	26.6194	162.5
Hyla_annectans_wulingensis	27.95	108.25	416.8	2015	8	26.1677	138.7
Hyla_annectans_wulingensis	27.95	108.25	416.8	2016	8	27.4968	132.5
Hyla_annectans_wulingensis	27.95	108.25	416.8	2012	9	22.64	81.2
Hyla_annectans_wulingensis	27.95	108.25	416.8	2013	9	23.3067	134.5
Hyla_annectans_wulingensis	27.95	108.25	416.8	2014	9	25.2133	30.2
Hyla_annectans_wulingensis	27.95	108.25	416.8	2015	9	23.1533	117.1
Hyla_annectans_wulingensis	27.95	108.25	416.8	2016	9	24.51	27.4
Hyla_annectans_wulingensis	27.95	108.25	416.8	2012	10	17.829	94.3
Hyla_annectans_wulingensis	27.95	108.25	416.8	2013	10	18.271	23.2
Hyla_annectans_wulingensis	27.95	108.25	416.8	2014	10	20.6387	42.2
Hyla_annectans_wulingensis	27.95	108.25	416.8	2015	10	19.9645	75.1
Hyla_annectans_wulingensis	27.95	108.25	416.8	2016	10	19.8516	94.5
Hyla_annectans_wulingensis	27.95	108.25	416.8	2012	11	12.3867	51.5
Hyla_annectans_wulingensis	27.95	108.25	416.8	2013	11	14.8167	65.8
Hyla_annectans_wulingensis	27.95	108.25	416.8	2014	11	13.4533	64.8
Hyla_annectans_wulingensis	27.95	108.25	416.8	2015	11	14.2033	45.5
Hyla_annectans_wulingensis	27.95	108.25	416.8	2016	11	13.92	51.1
Hyla_annectans_wulingensis	27.95	108.25	416.8	2012	12	6.94839	28.1
Hyla_annectans_wulingensis	27.95	108.25	416.8	2013	12	8.92258	16.1
Hyla_annectans_wulingensis	27.95	108.25	416.8	2014	12	8.99032	3.5
Hyla_annectans_wulingensis	27.95	108.25	416.8	2015	12	8.40645	66.8
Hyla_annectans_wulingensis	27.95	108.25	416.8	2016	12	9.51935	29.1
Hyla_chinensis	22.7	111.6	60	2012	1	11.4032	73.9
Hyla_chinensis	22.7	111.6	60	2013	1	13.8161	5.3
Hyla_chinensis	22.7	111.6	60	2014	1	13.4742	0
Hyla_chinensis	22.7	111.6	60	2015	1	14.3806	83.1
Hyla_chinensis	22.7	111.6	60	2016	1	13.7645	322
Hyla_chinensis	22.7	111.6	60	2012	2	14.2448	37.6
Hyla_chinensis	22.7	111.6	60	2013	2	17.8714	15.6
Hyla_chinensis	22.7	111.6	60	2014	2	13.8071	25
Hyla_chinensis	22.7	111.6	60	2015	2	17.4929	15.1
Hyla_chinensis	22.7	111.6	60	2016	2	12.9172	41.5
Hyla_chinensis	22.7	111.6	60	2012	3	18.8032	55.2
Hyla_chinensis	22.7	111.6	60	2013	3	21.1097	189.8
Hyla_chinensis	22.7	111.6	60	2014	3	18.4097	107.4
Hyla_chinensis	22.7	111.6	60	2015	3	20.0194	20.6
Hyla_chinensis	22.7	111.6	60	2016	3	18.0355	64.9
Hyla_chinensis	22.7	111.6	60	2012	4	24.45	217.3
Hyla_chinensis	22.7	111.6	60	2013	4	22.22	139.3
Hyla_chinensis	22.7	111.6	60	2014	4	23.9033	165.8
Hyla_chinensis	22.7	111.6	60	2015	4	23.5333	54.4
Hyla_chinensis	22.7	111.6	60	2016	4	24.8233	89.3
Hyla_chinensis	22.7	111.6	60	2012	5	27.4419	144.4
Hyla_chinensis	22.7	111.6	60	2013	5	26.1387	161.7
Hyla_chinensis	22.7	111.6	60	2014	5	25.8484	305.1
Hyla_chinensis	22.7	111.6	60	2015	5	27.3742	343.8
Hyla_chinensis	22.7	111.6	60	2016	5	27.1258	131.9
Hyla_chinensis	22.7	111.6	60	2012	6	28.3548	257.9
Hyla_chinensis	22.7	111.6	60	2013	6	27.9067	153.6
Hyla_chinensis	22.7	111.6	60	2014	6	28.8467	222.2
Hyla_chinensis	22.7	111.6	60	2015	6	28.6967	211.1
Hyla_chinensis	22.7	111.6	60	2016	6	28.8733	157.8
Hyla_chinensis	22.7	111.6	60	2012	7	28.3548	226.3
Hyla_chinensis	22.7	111.6	60	2013	7	27.729	143.5
Hyla_chinensis	22.7	111.6	60	2014	7	28.6935	173
Hyla_chinensis	22.7	111.6	60	2015	7	28.4323	150.6
Hyla_chinensis	22.7	111.6	60	2016	7	29.5742	97.1
Hyla_chinensis	22.7	111.6	60	2012	8	28.5387	103.1
Hyla_chinensis	22.7	111.6	60	2013	8	28.171	231.6
Hyla_chinensis	22.7	111.6	60	2014	8	27.9839	116.6
Hyla_chinensis	22.7	111.6	60	2015	8	29.0581	184.6
Hyla_chinensis	22.7	111.6	60	2016	8	28.4516	252
Hyla_chinensis	22.7	111.6	60	2012	9	26.4733	55.2
Hyla_chinensis	22.7	111.6	60	2013	9	26.86	160.9
Hyla_chinensis	22.7	111.6	60	2014	9	27.8233	101.9
Hyla_chinensis	22.7	111.6	60	2015	9	27.5067	76
Hyla_chinensis	22.7	111.6	60	2016	9	27.6367	92.4
Hyla_chinensis	22.7	111.6	60	2012	10	24.1968	106.7
Hyla_chinensis	22.7	111.6	60	2013	10	23.4065	3.6
Hyla_chinensis	22.7	111.6	60	2014	10	24.6484	4.3
Hyla_chinensis	22.7	111.6	60	2015	10	24.3032	187.3
Hyla_chinensis	22.7	111.6	60	2016	10	25.6097	84.6
Hyla_chinensis	22.7	111.6	60	2012	11	19.9067	175.4
Hyla_chinensis	22.7	111.6	60	2013	11	19.52	129.4
Hyla_chinensis	22.7	111.6	60	2014	11	20.8133	32.8
Hyla_chinensis	22.7	111.6	60	2015	11	21.73	65.4
Hyla_chinensis	22.7	111.6	60	2016	11	19.7367	142.2
Hyla_chinensis	22.7	111.6	60	2012	12	15.3065	90.8
Hyla_chinensis	22.7	111.6	60	2013	12	11.8452	200.9
Hyla_chinensis	22.7	111.6	60	2014	12	12.871	61.7
Hyla_chinensis	22.7	111.6	60	2015	12	15.1032	132.3
Hyla_chinensis	22.7	111.6	60	2016	12	17.0419	0
Hyla_sanchiangensis	27.95	108.25	416.8	2012	1	4.66129	19.5
Hyla_sanchiangensis	27.95	108.25	416.8	2013	1	6.7129	12
Hyla_sanchiangensis	27.95	108.25	416.8	2014	1	8.84516	7
Hyla_sanchiangensis	27.95	108.25	416.8	2015	1	9.30968	11
Hyla_sanchiangensis	27.95	108.25	416.8	2016	1	6.87097	35.4
Hyla_sanchiangensis	27.95	108.25	416.8	2012	2	5.7	15.8
Hyla_sanchiangensis	27.95	108.25	416.8	2013	2	10.0286	24.4
Hyla_sanchiangensis	27.95	108.25	416.8	2014	2	6.85357	20.1
Hyla_sanchiangensis	27.95	108.25	416.8	2015	2	9.775	44.8
Hyla_sanchiangensis	27.95	108.25	416.8	2016	2	9.48276	10.9
Hyla_sanchiangensis	27.95	108.25	416.8	2012	3	11.1	52.2
Hyla_sanchiangensis	27.95	108.25	416.8	2013	3	15.3548	69.3
Hyla_sanchiangensis	27.95	108.25	416.8	2014	3	13.329	57.6
Hyla_sanchiangensis	27.95	108.25	416.8	2015	3	13.7613	32
Hyla_sanchiangensis	27.95	108.25	416.8	2016	3	13.4355	149.3
Hyla_sanchiangensis	27.95	108.25	416.8	2012	4	18.8067	90.8
Hyla_sanchiangensis	27.95	108.25	416.8	2013	4	17.21	119.7
Hyla_sanchiangensis	27.95	108.25	416.8	2014	4	18.1	132.5
Hyla_sanchiangensis	27.95	108.25	416.8	2015	4	19.0067	42.4
Hyla_sanchiangensis	27.95	108.25	416.8	2016	4	18.4367	139.6
Hyla_sanchiangensis	27.95	108.25	416.8	2012	5	21.6323	188.6
Hyla_sanchiangensis	27.95	108.25	416.8	2013	5	22.0677	149.5
Hyla_sanchiangensis	27.95	108.25	416.8	2014	5	20.4258	209.4
Hyla_sanchiangensis	27.95	108.25	416.8	2015	5	22.4	211
Hyla_sanchiangensis	27.95	108.25	416.8	2016	5	21.3839	231.1
Hyla_sanchiangensis	27.95	108.25	416.8	2012	6	27.8613	120.5
Hyla_sanchiangensis	27.95	108.25	416.8	2013	6	26.3833	65.1
Hyla_sanchiangensis	27.95	108.25	416.8	2014	6	24.07	187.8
Hyla_sanchiangensis	27.95	108.25	416.8	2015	6	25.5133	225.4
Hyla_sanchiangensis	27.95	108.25	416.8	2016	6	25.8067	174
Hyla_sanchiangensis	27.95	108.25	416.8	2012	7	27.8613	244.3
Hyla_sanchiangensis	27.95	108.25	416.8	2013	7	30.2258	25.1
Hyla_sanchiangensis	27.95	108.25	416.8	2014	7	26.9968	499.4
Hyla_sanchiangensis	27.95	108.25	416.8	2015	7	26.1645	63.9
Hyla_sanchiangensis	27.95	108.25	416.8	2016	7	28.7387	155.4
Hyla_sanchiangensis	27.95	108.25	416.8	2012	8	27.1387	83.1
Hyla_sanchiangensis	27.95	108.25	416.8	2013	8	29.0839	59.5
Hyla_sanchiangensis	27.95	108.25	416.8	2014	8	26.6194	162.5
Hyla_sanchiangensis	27.95	108.25	416.8	2015	8	26.1677	138.7
Hyla_sanchiangensis	27.95	108.25	416.8	2016	8	27.4968	132.5
Hyla_sanchiangensis	27.95	108.25	416.8	2012	9	22.64	81.2
Hyla_sanchiangensis	27.95	108.25	416.8	2013	9	23.3067	134.5
Hyla_sanchiangensis	27.95	108.25	416.8	2014	9	25.2133	30.2
Hyla_sanchiangensis	27.95	108.25	416.8	2015	9	23.1533	117.1
Hyla_sanchiangensis	27.95	108.25	416.8	2016	9	24.51	27.4
Hyla_sanchiangensis	27.95	108.25	416.8	2012	10	17.829	94.3
Hyla_sanchiangensis	27.95	108.25	416.8	2013	10	18.271	23.2
Hyla_sanchiangensis	27.95	108.25	416.8	2014	10	20.6387	42.2
Hyla_sanchiangensis	27.95	108.25	416.8	2015	10	19.9645	75.1
Hyla_sanchiangensis	27.95	108.25	416.8	2016	10	19.8516	94.5
Hyla_sanchiangensis	27.95	108.25	416.8	2012	11	12.3867	51.5
Hyla_sanchiangensis	27.95	108.25	416.8	2013	11	14.8167	65.8
Hyla_sanchiangensis	27.95	108.25	416.8	2014	11	13.4533	64.8
Hyla_sanchiangensis	27.95	108.25	416.8	2015	11	14.2033	45.5
Hyla_sanchiangensis	27.95	108.25	416.8	2016	11	13.92	51.1
Hyla_sanchiangensis	27.95	108.25	416.8	2012	12	6.94839	28.1
Hyla_sanchiangensis	27.95	108.25	416.8	2013	12	8.92258	16.1
Hyla_sanchiangensis	27.95	108.25	416.8	2014	12	8.99032	3.5
Hyla_sanchiangensis	27.95	108.25	416.8	2015	12	8.40645	66.8
Hyla_sanchiangensis	27.95	108.25	416.8	2016	12	9.51935	29.1
Hyla_tsinlingensis	30.6	109.717	609.2	2012	1	3.87097	16.6
Hyla_tsinlingensis	30.6	109.717	609.2	2013	1	4.67097	13
Hyla_tsinlingensis	30.6	109.717	609.2	2014	1	5.29677	9.1
Hyla_tsinlingensis	30.6	109.717	609.2	2015	1	6.28065	22.9
Hyla_tsinlingensis	30.6	109.717	609.2	2016	1	4.76452	47.2
Hyla_tsinlingensis	30.6	109.717	609.2	2012	2	5.03448	1.9
Hyla_tsinlingensis	30.6	109.717	609.2	2013	2	7.65	19
Hyla_tsinlingensis	30.6	109.717	609.2	2014	2	5.40714	14.3
Hyla_tsinlingensis	30.6	109.717	609.2	2015	2	6.92143	45
Hyla_tsinlingensis	30.6	109.717	609.2	2016	2	6.77586	29.5
Hyla_tsinlingensis	30.6	109.717	609.2	2012	3	9.70645	95.3
Hyla_tsinlingensis	30.6	109.717	609.2	2013	3	13.3968	54.1
Hyla_tsinlingensis	30.6	109.717	609.2	2014	3	11.4839	51.2
Hyla_tsinlingensis	30.6	109.717	609.2	2015	3	12.1871	41.4
Hyla_tsinlingensis	30.6	109.717	609.2	2016	3	11.4	74.5
Hyla_tsinlingensis	30.6	109.717	609.2	2012	4	15.71	106.3
Hyla_tsinlingensis	30.6	109.717	609.2	2013	4	16.6233	74.5
Hyla_tsinlingensis	30.6	109.717	609.2	2014	4	16.1333	165.6
Hyla_tsinlingensis	30.6	109.717	609.2	2015	4	16.2633	125.4
Hyla_tsinlingensis	30.6	109.717	609.2	2016	4	16.9933	134.8
Hyla_tsinlingensis	30.6	109.717	609.2	2012	5	19.7968	204.1
Hyla_tsinlingensis	30.6	109.717	609.2	2013	5	20.4742	191.9
Hyla_tsinlingensis	30.6	109.717	609.2	2014	5	18.4903	104.2
Hyla_tsinlingensis	30.6	109.717	609.2	2015	5	20.0258	166.2
Hyla_tsinlingensis	30.6	109.717	609.2	2016	5	19.8613	178.6
Hyla_tsinlingensis	30.6	109.717	609.2	2012	6	26.4065	90.8
Hyla_tsinlingensis	30.6	109.717	609.2	2013	6	24.7033	145.7
Hyla_tsinlingensis	30.6	109.717	609.2	2014	6	22.72	155.2
Hyla_tsinlingensis	30.6	109.717	609.2	2015	6	22.6733	244.4
Hyla_tsinlingensis	30.6	109.717	609.2	2016	6	22.9333	575
Hyla_tsinlingensis	30.6	109.717	609.2	2012	7	26.4065	221.9
Hyla_tsinlingensis	30.6	109.717	609.2	2013	7	27.0774	203.1
Hyla_tsinlingensis	30.6	109.717	609.2	2014	7	25.8968	190.8
Hyla_tsinlingensis	30.6	109.717	609.2	2015	7	24.4903	148.3
Hyla_tsinlingensis	30.6	109.717	609.2	2016	7	26.4194	447.9
Hyla_tsinlingensis	30.6	109.717	609.2	2012	8	26.2548	145.9
Hyla_tsinlingensis	30.6	109.717	609.2	2013	8	26.6581	159.8
Hyla_tsinlingensis	30.6	109.717	609.2	2014	8	23.971	327.2
Hyla_tsinlingensis	30.6	109.717	609.2	2015	8	24.7226	206
Hyla_tsinlingensis	30.6	109.717	609.2	2016	8	26.4032	191.7
Hyla_tsinlingensis	30.6	109.717	609.2	2012	9	20.6333	187.4
Hyla_tsinlingensis	30.6	109.717	609.2	2013	9	20.1133	154.6
Hyla_tsinlingensis	30.6	109.717	609.2	2014	9	21.9033	276.9
Hyla_tsinlingensis	30.6	109.717	609.2	2015	9	21.2033	149.8
Hyla_tsinlingensis	30.6	109.717	609.2	2016	9	22.7633	154.7
Hyla_tsinlingensis	30.6	109.717	609.2	2012	10	15.2258	95.7
Hyla_tsinlingensis	30.6	109.717	609.2	2013	10	16.7129	36.2
Hyla_tsinlingensis	30.6	109.717	609.2	2014	10	16.8097	101.4
Hyla_tsinlingensis	30.6	109.717	609.2	2015	10	17.8548	43.8
Hyla_tsinlingensis	30.6	109.717	609.2	2016	10	17.5774	132.9
Hyla_tsinlingensis	30.6	109.717	609.2	2012	11	10.6033	32.7
Hyla_tsinlingensis	30.6	109.717	609.2	2013	11	11.7767	75.6
Hyla_tsinlingensis	30.6	109.717	609.2	2014	11	11.2367	71.5
Hyla_tsinlingensis	30.6	109.717	609.2	2015	11	11.85	85.5
Hyla_tsinlingensis	30.6	109.717	609.2	2016	11	11.27	103.8
Hyla_tsinlingensis	30.6	109.717	609.2	2012	12	5.23548	24.4
Hyla_tsinlingensis	30.6	109.717	609.2	2013	12	5.99032	17.2
Hyla_tsinlingensis	30.6	109.717	609.2	2014	12	5.57419	6.1
Hyla_tsinlingensis	30.6	109.717	609.2	2015	12	6.46129	34.1
Hyla_tsinlingensis	30.6	109.717	609.2	2016	12	7.07742	10.2
Hylarana_guentheri	30.5	105.55	355	2012	1	5.85484	32.5
Hylarana_guentheri	30.5	105.55	355	2013	1	6.49032	8.7
Hylarana_guentheri	30.5	105.55	355	2014	1	6.71935	1.9
Hylarana_guentheri	30.5	105.55	355	2015	1	8.12903	17.8
Hylarana_guentheri	30.5	105.55	355	2016	1	6.52581	23
Hylarana_guentheri	30.5	105.55	355	2012	2	6.93793	25.4
Hylarana_guentheri	30.5	105.55	355	2013	2	10.375	7.9
Hylarana_guentheri	30.5	105.55	355	2014	2	7.17143	18.6
Hylarana_guentheri	30.5	105.55	355	2015	2	10.0821	9.5
Hylarana_guentheri	30.5	105.55	355	2016	2	8.92069	15.6
Hylarana_guentheri	30.5	105.55	355	2012	3	12.8742	21.9
Hylarana_guentheri	30.5	105.55	355	2013	3	17.1129	10.4
Hylarana_guentheri	30.5	105.55	355	2014	3	12.9581	43.2
Hylarana_guentheri	30.5	105.55	355	2015	3	15.371	6.8
Hylarana_guentheri	30.5	105.55	355	2016	3	15.0129	32.4
Hylarana_guentheri	30.5	105.55	355	2012	4	19.48	26.3
Hylarana_guentheri	30.5	105.55	355	2013	4	19.76	28.9
Hylarana_guentheri	30.5	105.55	355	2014	4	18.7333	67.5
Hylarana_guentheri	30.5	105.55	355	2015	4	19.6133	104.9
Hylarana_guentheri	30.5	105.55	355	2016	4	18.6667	85
Hylarana_guentheri	30.5	105.55	355	2012	5	22.0419	113.1
Hylarana_guentheri	30.5	105.55	355	2013	5	21.6226	199.9
Hylarana_guentheri	30.5	105.55	355	2014	5	20.7452	48.7
Hylarana_guentheri	30.5	105.55	355	2015	5	22.6839	78.1
Hylarana_guentheri	30.5	105.55	355	2016	5	21.6935	111.7
Hylarana_guentheri	30.5	105.55	355	2012	6	25.7742	93
Hylarana_guentheri	30.5	105.55	355	2013	6	26.2033	399.5
Hylarana_guentheri	30.5	105.55	355	2014	6	23.4933	214.7
Hylarana_guentheri	30.5	105.55	355	2015	6	24.8067	207.7
Hylarana_guentheri	30.5	105.55	355	2016	6	25.8133	110.3
Hylarana_guentheri	30.5	105.55	355	2012	7	25.7742	364.5
Hylarana_guentheri	30.5	105.55	355	2013	7	27.7161	335.8
Hylarana_guentheri	30.5	105.55	355	2014	7	27.9484	115.6
Hylarana_guentheri	30.5	105.55	355	2015	7	27.2065	70.2
Hylarana_guentheri	30.5	105.55	355	2016	7	28.2097	162.2
Hylarana_guentheri	30.5	105.55	355	2012	8	27.429	135.5
Hylarana_guentheri	30.5	105.55	355	2013	8	27.6452	65.1
Hylarana_guentheri	30.5	105.55	355	2014	8	25.9581	199.8
Hylarana_guentheri	30.5	105.55	355	2015	8	26.2065	246.9
Hylarana_guentheri	30.5	105.55	355	2016	8	27.9452	218.4
Hylarana_guentheri	30.5	105.55	355	2012	9	21.4667	198.3
Hylarana_guentheri	30.5	105.55	355	2013	9	21.3833	170.1
Hylarana_guentheri	30.5	105.55	355	2014	9	22.44	265.2
Hylarana_guentheri	30.5	105.55	355	2015	9	22.2867	157.5
Hylarana_guentheri	30.5	105.55	355	2016	9	23.5933	87
Hylarana_guentheri	30.5	105.55	355	2012	10	17.2968	59.4
Hylarana_guentheri	30.5	105.55	355	2013	10	17.9806	39.6
Hylarana_guentheri	30.5	105.55	355	2014	10	18.8613	89.5
Hylarana_guentheri	30.5	105.55	355	2015	10	19.0258	149.8
Hylarana_guentheri	30.5	105.55	355	2016	10	18.4	222.1
Hylarana_guentheri	30.5	105.55	355	2012	11	11.6633	6.3
Hylarana_guentheri	30.5	105.55	355	2013	11	12.64	41.7
Hylarana_guentheri	30.5	105.55	355	2014	11	12.79	20.8
Hylarana_guentheri	30.5	105.55	355	2015	11	14.5567	20.4
Hylarana_guentheri	30.5	105.55	355	2016	11	12.73	37.4
Hylarana_guentheri	30.5	105.55	355	2012	12	7.43226	6.7
Hylarana_guentheri	30.5	105.55	355	2013	12	6.9129	3.4
Hylarana_guentheri	30.5	105.55	355	2014	12	7.48065	1
Hylarana_guentheri	30.5	105.55	355	2015	12	8.86129	18
Hylarana_guentheri	30.5	105.55	355	2016	12	9.32903	9.6
Hylarana_nigrotympanica	22	100.783	582	2012	1	17.7065	9.8
Hylarana_nigrotympanica	22	100.783	582	2013	1	18.1161	7.6
Hylarana_nigrotympanica	22	100.783	582	2014	1	16.8903	0
Hylarana_nigrotympanica	22	100.783	582	2015	1	16.6548	126.9
Hylarana_nigrotympanica	22	100.783	582	2016	1	16.3258	25.4
Hylarana_nigrotympanica	22	100.783	582	2012	2	20.1	0
Hylarana_nigrotympanica	22	100.783	582	2013	2	21.1607	29.1
Hylarana_nigrotympanica	22	100.783	582	2014	2	20.0393	0.2
Hylarana_nigrotympanica	22	100.783	582	2015	2	19.525	1.2
Hylarana_nigrotympanica	22	100.783	582	2016	2	18.7034	30.2
Hylarana_nigrotympanica	22	100.783	582	2012	3	22.0839	2.1
Hylarana_nigrotympanica	22	100.783	582	2013	3	21.7226	32.6
Hylarana_nigrotympanica	22	100.783	582	2014	3	22.1548	20.4
Hylarana_nigrotympanica	22	100.783	582	2015	3	22.7677	41.4
Hylarana_nigrotympanica	22	100.783	582	2016	3	22.8806	0
Hylarana_nigrotympanica	22	100.783	582	2012	4	25.5067	16.3
Hylarana_nigrotympanica	22	100.783	582	2013	4	24.8767	42.2
Hylarana_nigrotympanica	22	100.783	582	2014	4	25.46	43.2
[truncated: 4,962 more rows]
